# Supplementary material for: A quantum chemical study: thoughtful exploration for optimal donors in Y-type dual donor-based dye sensitizers
Source: Royal Society of Chemistry journal article supplement (doi:10.1039/d3cp03899h), 2023-01-01
Supplement: d3cp03899h1.pdf [file d3cp03899h1.pdf]

## **Supporting Information**

# **A Quantum Chemical Study: Thoughtful Exploration for Optimal Donors in Y-Type Dual Donor-Based Dye Sensitizers**

*Anil Kumar Behera, Preeti Nanda Sahu, Ganesh Chandra Sahu and Anik Sen\**

Department of Chemistry (CMDD Lab), GITAM School of Science, GITAM (Deemed to be  
University), Visakhapatnam-530045, AP, India, Email: [anikchem@gmail.com](mailto:anikchem@gmail.com); [asen@gitam.edu](mailto:asen@gitam.edu)

| S. No. |                                                                                                                                                                                                                                                                                                                                                                                                                      | Page No. |
|--------|----------------------------------------------------------------------------------------------------------------------------------------------------------------------------------------------------------------------------------------------------------------------------------------------------------------------------------------------------------------------------------------------------------------------|----------|
| 1      | <b>Figure S1.</b> Schematic diagram showing the donor, spacer and acceptor for the dye sensitizer. Here D is the different Donor groups. The numbering given here are followed in the tables below.                                                                                                                                                                                                                  | 3        |
| 2      | <b>Table S1.</b> The specific distances for the dye sensitizers.                                                                                                                                                                                                                                                                                                                                                     | 4        |
| 3      | <b>Table S2.</b> The specific dihedral angles for the dye sensitizers.                                                                                                                                                                                                                                                                                                                                               | 5        |
| 4      | <b>Table S3.</b> ESP charges of the different donors.                                                                                                                                                                                                                                                                                                                                                                | 6        |
| 5      | <b>Table S4.</b> The electrostatic charges of spacers and acceptors for the dual donor-based dyes.                                                                                                                                                                                                                                                                                                                   | 7        |
| 6      | <b>Figure S2.</b> HOMO and LUMO energies and the H-L gap for the selected double donor-based dyes in eV are given here.                                                                                                                                                                                                                                                                                              | 8        |
| 7      | <b>Table S5.</b> The Calculated charge transfer length ( $D_{CT}$ ) and the descriptor for the charge-transfer possibility ( $\Delta r$ ) are given here for the efficient dyes.                                                                                                                                                                                                                                     | 9-10     |
| 8      | <b>Figure S3.</b> Absorption spectra of the free dyes in DCM solvent.                                                                                                                                                                                                                                                                                                                                                | 11       |
| 9      | <b>Figure S4.</b> MESP analysis of the selected 9 dye sensitizers. The MESP are generated at isosurface value of 0.0004 e/au <sup>3</sup> .                                                                                                                                                                                                                                                                          | 12       |
| 10     | <b>Table S6.</b> The Calculated charge transfer length ( $D_{CT}$ ) and the descriptor for the charge-transfer possibility ( $\Delta r$ ) are given here for the efficient dyes interacted to TiO <sub>2</sub> . The Charge Density Difference plots and the Centroids of the different dyes in DCM solvent are also given here. (isosurface value of 0.0004 a.u.) Charge density transfers from sky blue to purple. | 13-14    |
| 11     | Answer to the reviewer for the radiative lifetime calculation and comparing with our previous calculations for selected dye sensitizers with two different solvent model.                                                                                                                                                                                                                                            | 15       |
| 12     | Proof of concept for choosing Dual donor-based dyes                                                                                                                                                                                                                                                                                                                                                                  | 16       |
| 13     | Cartesian coordinates of all the free dyes                                                                                                                                                                                                                                                                                                                                                                           | 18-67    |
| 14     | Cartesian coordinates of the best dyes interacted to the TiO <sub>2</sub> cluster                                                                                                                                                                                                                                                                                                                                    | 68-86    |

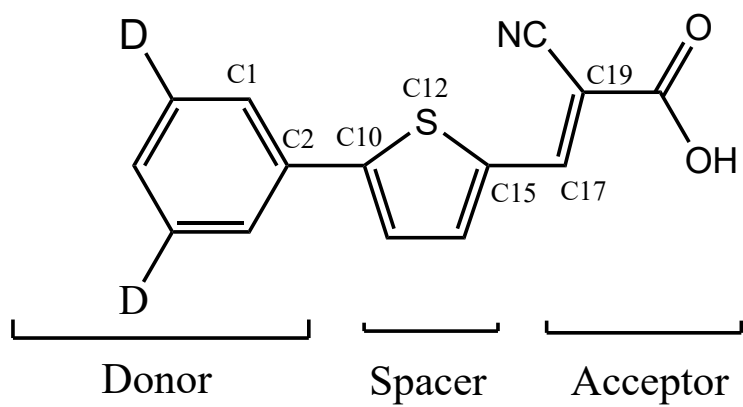

**Figure S1.** Schematic diagram showing the donor, spacer and acceptor for the dye sensitizer. Here D is the different Donor groups. The numbering given here are followed in the tables below.

Table S1. The specific distances for the dye sensitizers.

| <b>Name</b> | <b>Distances</b> |                |
|-------------|------------------|----------------|
|             | <b>C2-C10</b>    | <b>C15-C17</b> |
| <b>P-1</b>  | 1.46577          | 1.42632        |
| <b>NS-1</b> | 1.46711          | 1.42507        |
| <b>NS-2</b> | 1.46664          | 1.42613        |
| <b>NS-3</b> | 1.46643          | 1.42566        |
| <b>NS-4</b> | 1.4667           | 1.42636        |
| <b>NS-5</b> | 1.46746          | 1.42672        |
| <b>NS-6</b> | 1.46694          | 1.42671        |
| <b>NS-7</b> | 1.46764          | 1.42938        |
| <b>NS-8</b> | 1.46657          | 1.42596        |
| <b>NS-9</b> | 1.46746          | 1.42842        |
| <b>B-1</b>  | 1.46725          | 1.42727        |
| <b>B-2</b>  | 1.4669           | 1.42671        |
| <b>B-3</b>  | 1.4667           | 1.42638        |
| <b>B-4</b>  | 1.46694          | 1.42799        |
| <b>B-5</b>  | 1.46675          | 1.42657        |
| <b>B-6</b>  | 1.46695          | 1.42662        |
| <b>B-7</b>  | 1.46736          | 1.42833        |
| <b>B-8</b>  | 1.46713          | 1.42723        |
| <b>B-9</b>  | 1.46752          | 1.4273         |
| <b>B-10</b> | 1.46736          | 1.42711        |
| <b>Cb-1</b> | 1.46901          | 1.42647        |
| <b>Cb-2</b> | 1.46718          | 1.42754        |
| <b>Cb-3</b> | 1.46806          | 1.42925        |
| <b>Cb-4</b> | 1.4664           | 1.42626        |
| <b>Cb-5</b> | 1.46703          | 1.42782        |
| <b>Cb-6</b> | 1.46737          | 1.42811        |
| <b>Cb-7</b> | 1.46645          | 1.42577        |
| <b>Cb-8</b> | 1.46641          | 1.42624        |
| <b>H-1</b>  | 1.46686          | 1.42691        |
| <b>H-2</b>  | 1.46787          | 1.4274         |
| <b>H-3</b>  | 1.46731          | 1.42865        |
| <b>H-4</b>  | 1.46654          | 1.42594        |
| <b>H-5</b>  | 1.46748          | 1.42672        |
| <b>H-6</b>  | 1.46735          | 1.42654        |
| <b>H-7</b>  | 1.46724          | 1.42638        |

Table S2. The specific dihedral angles for the dye sensitizers.

| <b>Name</b> | <b>C1-C2-C10-C12</b> | <b>C12-C15-C17-C19</b> | <b>C1-C2-C17-C19</b> | <b>C2-C10-C15-C17</b> |
|-------------|----------------------|------------------------|----------------------|-----------------------|
| P-1         | 24.27219             | -1.23291               | 20.69062             | -0.60706              |
| NS-1        | 28.6437              | -1.28289               | 24.47771             | -1.5986               |
| NS-2        | -24.49473            | 1.20574                | -20.90938            | 0.61238               |
| NS-3        | 26.30207             | -0.46746               | 23.2184              | -0.58331              |
| NS-4        | -27.18896            | 0.85957                | -23.4923             | 1.18566               |
| NS-5        | 26.28195             | -0.63496               | 23.0819              | -0.18054              |
| NS-6        | -26.75339            | 0.56723                | -23.29908            | 1.46911               |
| NS-7        | -27.23688            | 0.6378                 | -23.7256             | 1.15833               |
| NS-8        | -28.11322            | 0.65576                | -24.48738            | 1.14583               |
| NS-9        | 27.37281             | -0.82507               | 23.65676             | -1.37536              |
| B-1         | -23.85801            | 1.27385                | -20.27334            | 0.66788               |
| B-2         | -28.06644            | 0.78544                | -24.34887            | 0.99123               |
| B-3         | -25.83252            | 1.238                  | -21.8973             | 1.45511               |
| B-4         | -27.8682             | 0.76014                | -24.20712            | 0.99393               |
| B-5         | -25.33603            | 0.82477                | -21.88474            | 0.97683               |
| B-6         | -25.66449            | 1.13928                | -22.00349            | 0.60051               |
| B-7         | -27.40879            | 0.77494                | -23.74497            | 1.26117               |
| B-8         | 26.97737             | -0.87269               | 23.24919             | -1.37639              |
| B-9         | 26.81716             | -0.75017               | 23.3478              | -0.70865              |
| B-10        | -26.93588            | 0.4671                 | -23.58134            | 1.31616               |
| Cb-1        | -26.97938            | 1.10964                | -23.03983            | 1.35712               |
| Cb-2        | -27.49714            | 0.65049                | -23.90124            | 1.38953               |
| Cb-3        | 27.24447             | -0.66711               | 23.69699             | -1.24582              |
| Cb-4        | -27.64838            | 0.80184                | -23.94348            | 1.14925               |
| Cb-5        | 23.87901             | -1.41186               | 20.16894             | -0.60475              |
| Cb-6        | 25.69295             | -0.23795               | 22.78603             | -0.82847              |
| Cb-7        | -26.32345            | 0.98324                | -22.74414            | 0.56002               |
| Cb-8        | -26.54804            | 0.80437                | -23.2251             | 0.3482                |
| H-1         | -27.33912            | 0.89178                | -23.57854            | 1.25017               |
| H-2         | -26.69869            | 1.26526                | -22.86979            | 0.46485               |
| H-3         | -23.25615            | 1.7106                 | -19.35649            | 0.47072               |
| H-4         | -28.63529            | 1.03486                | -24.61375            | 1.37303               |
| H-5         | -28.63529            | 1.03486                | -24.61375            | 1.37303               |
| H-6         | -22.30825            | 0.93969                | -19.11054            | 0.84471               |
| H-7         | -21.20161            | 1.46498                | -17.58318            | 1.23926               |

**Table S3.** ESP charges of the different donor groups.

| <b>System</b> | <b>ESP charges</b> | <b>Systems</b> | <b>ESP charges</b> |
|---------------|--------------------|----------------|--------------------|
| <b>P-1</b>    | 0.1424             | <b>B-9</b>     | 0.1060             |
| <b>NS-1</b>   | 0.0869             | <b>B-10</b>    | 0.1218             |
| <b>NS-2</b>   | 0.1267             | <b>Cb-1</b>    | 0.0973             |
| <b>NS-3</b>   | 0.1337             | <b>Cb-2</b>    | 0.1091             |
| <b>NS-4</b>   | 0.1386             | <b>Cb-3</b>    | 0.0575             |
| <b>NS-5</b>   | 0.0986             | <b>Cb-4</b>    | 0.1267             |
| <b>NS-6</b>   | 0.1287             | <b>Cb-5</b>    | 0.1194             |
| <b>NS-7</b>   | 0.0735             | <b>Cb-6</b>    | 0.1146             |
| <b>NS-8</b>   | 0.1266             | <b>Cb-7</b>    | 0.1271             |
| <b>NS-9</b>   | 0.1218             | <b>Cb-8</b>    | 0.1322             |
| <b>B-1</b>    | 0.1144             | <b>H-1</b>     | 0.1101             |
| <b>B-2</b>    | 0.1115             | <b>H-2</b>     | 0.1031             |
| <b>B-3</b>    | 0.1199             | <b>H-3</b>     | 0.1128             |
| <b>B-4</b>    | 0.0850             | <b>H-4</b>     | 0.1762             |
| <b>B-5</b>    | 0.1253             | <b>H-5</b>     | 0.1166             |
| <b>B-6</b>    | 0.1252             | <b>H-6</b>     | 0.1453             |
| <b>B-7</b>    | 0.1079             | <b>H-7</b>     | 0.1403             |
| <b>B-8</b>    | 0.0976             |                |                    |

**Table S4.** The electrostatic charges of spacers and acceptors for the dual donor-based dyes.

| <b>System</b> | <b>Spacer</b> | <b>Acceptor</b> |
|---------------|---------------|-----------------|
| <b>P-1</b>    | 0.04213       | -0.184516       |
| <b>NS-1</b>   | 0.095541      | -0.182447       |
| <b>NS-2</b>   | 0.050178      | -0.176879       |
| <b>NS-3</b>   | 0.043273      | -0.177031       |
| <b>NS-4</b>   | 0.035606      | -0.17427        |
| <b>NS-5</b>   | 0.073377      | -0.172          |
| <b>NS-6</b>   | 0.050465      | -0.17916        |
| <b>NS-7</b>   | 0.082537      | -0.15611        |
| <b>NS-8</b>   | 0.067477      | -0.19408        |
| <b>NS-9</b>   | 0.046514      | -0.16831        |
| <b>B-1</b>    | 0.054933      | -0.16937        |
| <b>B-2</b>    | 0.064513      | -0.176042       |
| <b>B-3</b>    | 0.058458      | -0.178391       |
| <b>B-4</b>    | 0.072205      | -0.157192       |
| <b>B-5</b>    | 0.050281      | -0.175565       |
| <b>B-6</b>    | 0.057113      | -0.182361       |
| <b>B-7</b>    | 0.060469      | -0.168345       |
| <b>B-8</b>    | 0.066938      | -0.164513       |
| <b>B-9</b>    | 0.057643      | -0.163661       |
| <b>B-10</b>   | 0.05579       | -0.17919        |
| <b>Cb-1</b>   | 0.077017      | -0.174324       |
| <b>Cb-2</b>   | 0.061685      | -0.170845       |
| <b>Cb-3</b>   | 0.086966      | -0.144497       |
| <b>Cb-4</b>   | 0.054667      | -0.181402       |
| <b>Cb-5</b>   | 0.054033      | -0.173434       |
| <b>Cb-6</b>   | 0.060004      | -0.174621       |
| <b>Cb-7</b>   | 0.060371      | -0.18745        |
| <b>Cb-8</b>   | 0.050712      | -0.18295        |
| <b>H-1</b>    | 0.054322      | -0.16442        |
| <b>H-2</b>    | 0.057552      | -0.16071        |
| <b>H-3</b>    | 0.045491      | -0.15833        |
| <b>H-4</b>    | 0.062247      | -0.23843        |
| <b>H-5</b>    | 0.062527      | -0.17918        |
| <b>H-6</b>    | 0.036671      | -0.18198        |
| <b>H-7</b>    | 0.03682       | -0.17715        |

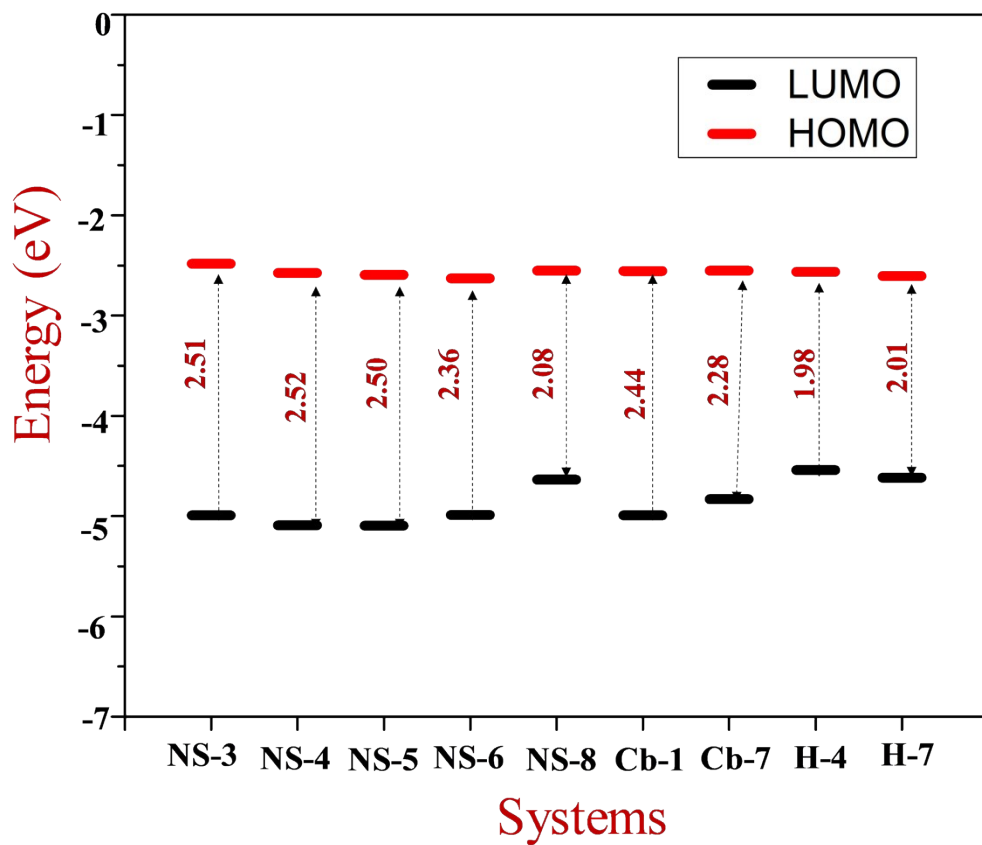

**Figure S2.** HOMO and LUMO energies and the H-L gap for the selected double donor-based dyes in eV are given here.



**Table S5.** The Calculated charge transfer length (DCT) and the descriptor for the charge-transfer possibility ( $\Delta r$ ) are given here for the efficient dyes.

| Systems | $D_{CT}$ in Å | $\Delta r$ | Centroids                                                                             |
|---------|---------------|------------|---------------------------------------------------------------------------------------|
| NS-3    | 3.12          | 5.91       | 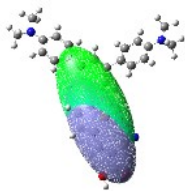   |
| NS-4    | 4.70          | 8.88       |    |
| NS-5    | 3.85          | 7.28       |   |
| NS-6    | 2.72          | 5.14       |  |
| NS-8    | 5.91          | 11.17      |  |

---

|             |      |       |                                                                                       |
|-------------|------|-------|---------------------------------------------------------------------------------------|
| <b>Cb-1</b> | 3.67 | 6.94  | 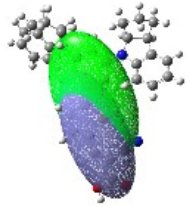   |
| <b>Cb-7</b> | 5.88 | 11.11 |    |
| <b>H-4</b>  | 5.16 | 9.78  |   |
| <b>H-7</b>  | 4.34 | 8.20  |  |

---

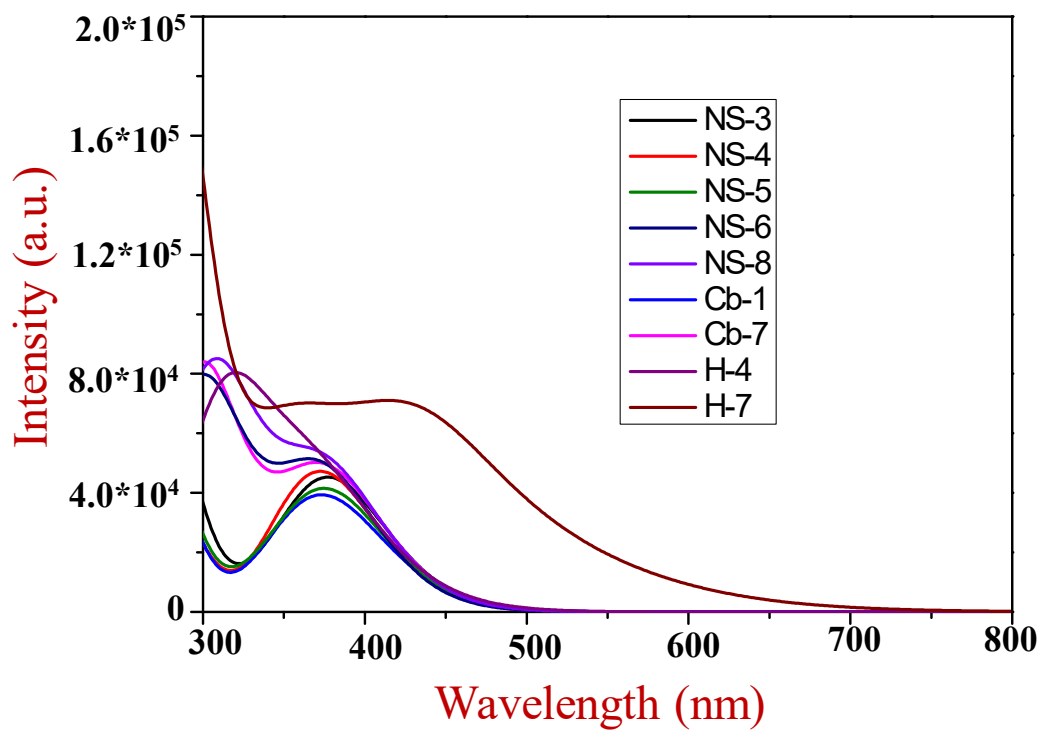

Figure S3. Absorption spectra of the free dyes in DCM solvent.

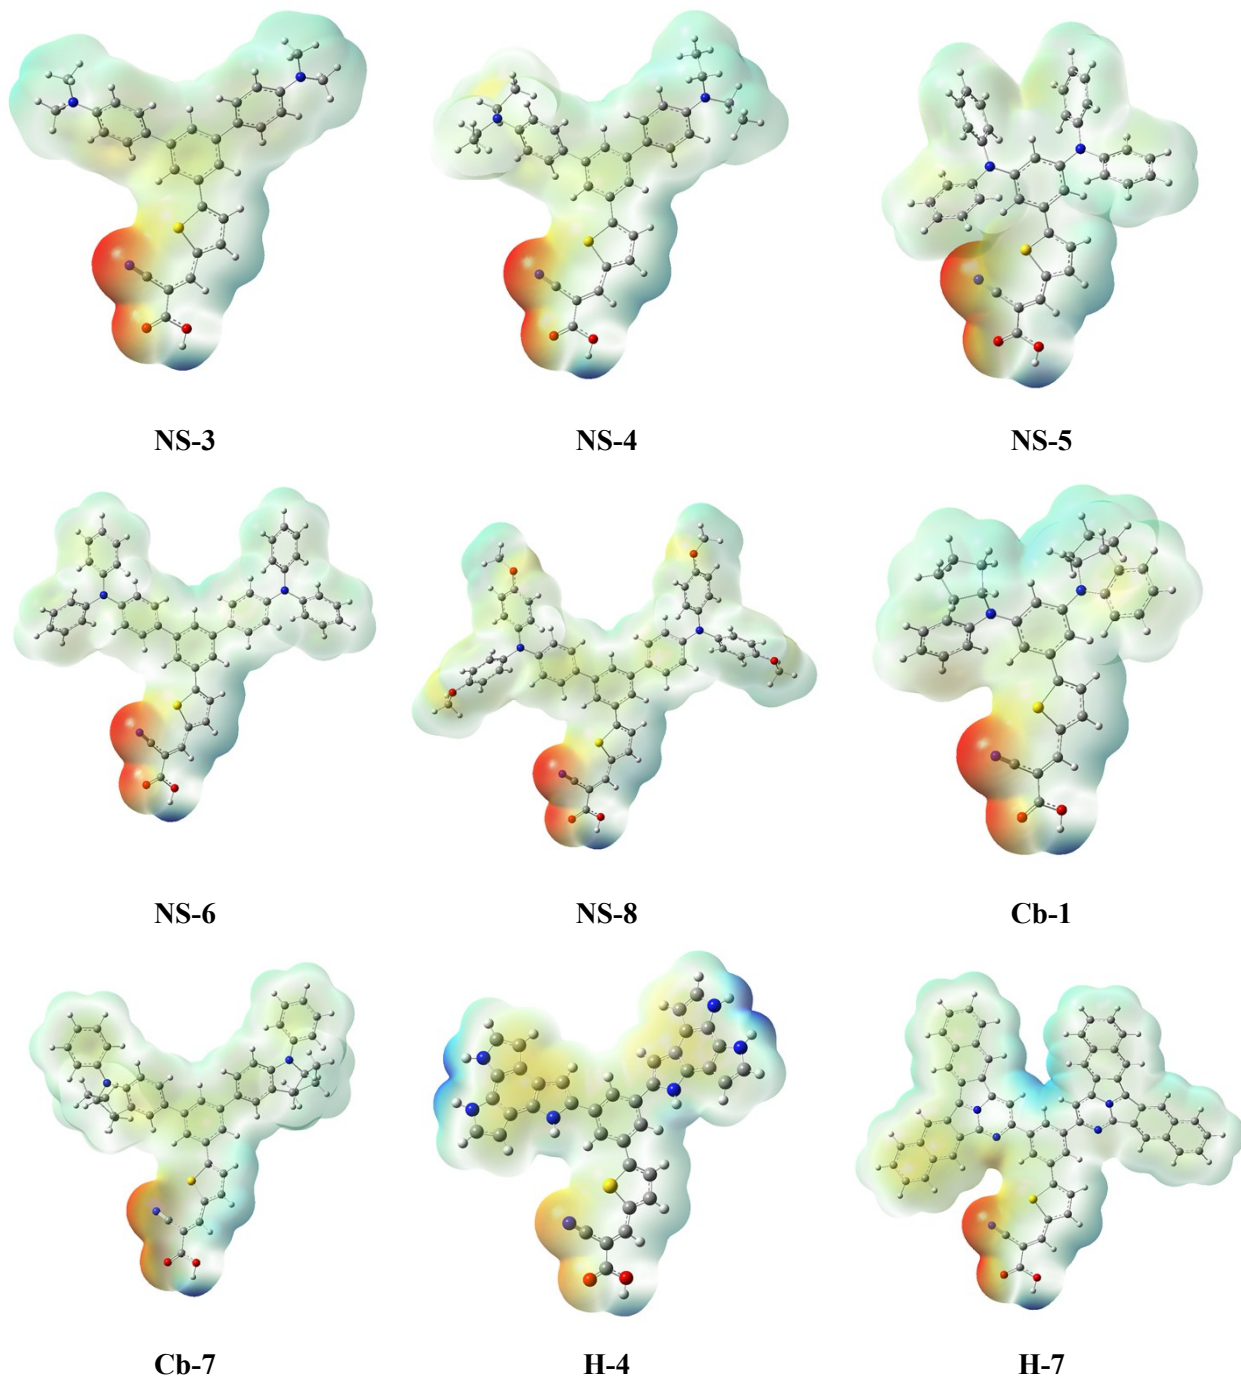

**Figure S4.** MESP analysis of the selected 9 dye sensitizers. The MESPs are generated at isosurface value of  $0.0004 \text{ e/au}^3$ .

**Table S6.** The Calculated charge transfer length ( $D_{CT}$ ) and the descriptor for the charge-transfer possibility ( $\Delta r$ ) are given here for the efficient dyes interacted to  $TiO_2$ . The Charge Density Difference plots and the Centroids of the different dyes in DCM solvent are also given here. (isosurface value of 0.0004 a.u.) Charge density transfers from sky blue to purple.

| Systems | $D_{CT}$ | $\Delta r$ | Centroids                                                                            |
|---------|----------|------------|--------------------------------------------------------------------------------------|
| NS-3    | 9.07     | 17.14      | 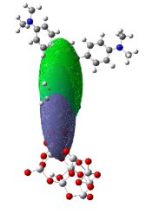   |
| NS-4    | 10.67    | 20.16      |    |
| NS-5    | 8.84     | 16.71      |   |
| NS-6    | 8.59     | 16.23      |  |

---

|             |       |       |
|-------------|-------|-------|
| <b>NS-8</b> | 10.36 | 19.59 |
|-------------|-------|-------|

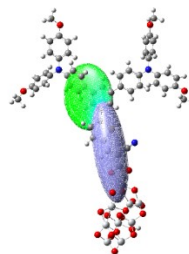

|             |      |       |
|-------------|------|-------|
| <b>Cb-1</b> | 7.70 | 14.56 |
|-------------|------|-------|

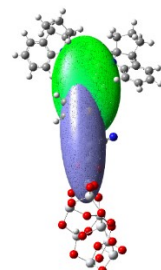

|             |       |       |
|-------------|-------|-------|
| <b>Cb-7</b> | 12.36 | 23.37 |
|-------------|-------|-------|

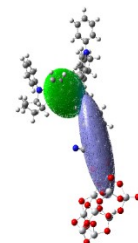

|            |       |       |
|------------|-------|-------|
| <b>H-4</b> | 13.54 | 25.60 |
|------------|-------|-------|

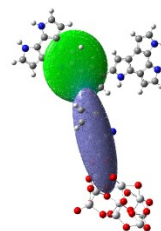

|            |      |      |
|------------|------|------|
| <b>H-7</b> | 3.88 | 7.34 |
|------------|------|------|

---

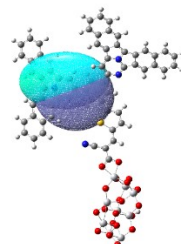

**Answer to the reviewer for the radiative lifetime calculation and comparing with our previous calculations for selected dye sensitizers with two different solvent model.**

*Emission rate for a transition between two levels  $|i\rangle$  state to  $|f\rangle$  State.*

$$A = \frac{\omega^3}{3\epsilon_0\pi\hbar C^3} |\mu_{if}|^2 \dots\dots\dots(1)$$

| Systems | Reviewer calculation                                                   |                  | Our calculation                             |                  |
|---------|------------------------------------------------------------------------|------------------|---------------------------------------------|------------------|
|         | (Radiative life time $\tau$ )                                          |                  | (Excited state life time $\tau$ )           |                  |
|         | $A = \frac{4\omega^3}{3C^3}  \mu_{if} ^2$ $\tau = 1/A \text{ (in ns)}$ |                  | $\tau = \frac{1.499}{fE^2} \text{ (in ns)}$ |                  |
|         | CPCM model                                                             | SS-cLR-PCM model | CPCM model                                  | SS-cLR-PCM model |
| NS-3    | 7.05                                                                   | 5.18             | 2.69                                        | 3.28             |
| NS-5    | 6.69                                                                   | 5.85             | 2.83                                        | 3.05             |
| NS-6    | 6.85                                                                   | 5.62             | 2.58                                        | 2.45             |
| NS-8    | 6.99                                                                   | 5.21             | 2.65                                        | 3.32             |

### Proof of concept from experimental analysis

From the data presented in the table below, it is evident that the incorporation of a double donor and a thiophene spacer significantly increases the efficiency of the dye. The efficiency of the dye TT with the double donor is almost double (5.12%) that of the dye T with a single donor (2.79%). WR5 with the thiophene spacer shows a higher efficiency of 4.70%.

In our manuscript, we have tried to search for the best donor moieties for such thiophene spacer-based dye sensitizers. So, this definitely have a vision of increasing the efficiency of the dye sensitizers through such design. Thus, our research aims to identify the best donor moieties for such dual donor based dye sensitizers, using carboxylic acid as a reference acceptor. Through molecular modelling, we are looking to design better and more efficient dual donor-based dyes grounded on the experimental results.

| Serial number | Structure and Reference                                                                                                                                                                                                                          | Experimental Efficiency $\eta$ (%) |
|---------------|--------------------------------------------------------------------------------------------------------------------------------------------------------------------------------------------------------------------------------------------------|------------------------------------|
| 1             | 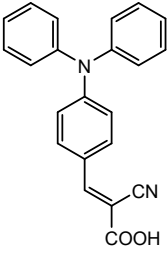 <p style="text-align: center;"><b>T</b></p> <p><b>Ref:</b> Jia, J., Cao, K., Xue, P., Zhang, Y., Zhou, H., &amp; Lu, R., Tetrahedron 2012, 68, 3626–3632.</p> | 2.79                               |
| 2             |  <p style="text-align: center;"><b>WR5</b></p> <p><b>Ref:</b> Wang, S., Guo, J., He, L., Wang, H., Zhao, J., Lu, C. Synthetic Metals 2013, 168, 1–8.</p>      | 4.70                               |



3

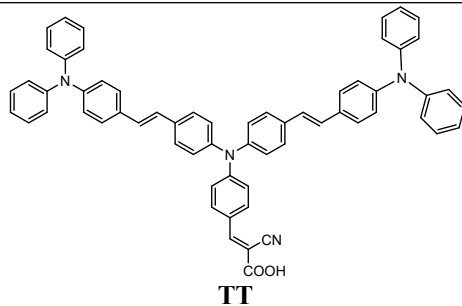

**Ref:** Jia, J., Cao, K., Xue, P., Zhang, Y., Zhou, H., & Lu, R., *Tetrahedron* 2012, 68, 3626–3632.

5.12

## Cartesian coordinates of all the free dyes

### P-1

|   |             |             |             |
|---|-------------|-------------|-------------|
| C | 0.06031500  | -0.58846800 | -0.30049000 |
| C | 0.41521300  | 0.76894900  | -0.22275300 |
| C | 1.74716000  | 1.16583600  | -0.08272300 |
| C | 2.73462600  | 0.17291100  | -0.02664600 |
| C | 2.42018200  | -1.19099000 | -0.10167100 |
| C | 1.07839000  | -1.55540400 | -0.23512500 |
| H | -0.35695200 | 1.53099300  | -0.29405700 |
| H | 3.77529500  | 0.47070600  | 0.08024600  |
| H | 0.81858900  | -2.61000100 | -0.26181300 |
| C | -1.33744800 | -1.00417300 | -0.44857700 |
| C | -1.82283500 | -2.18222200 | -0.99688200 |
| S | -2.64557400 | 0.01254500  | 0.10014100  |
| C | -3.22518800 | -2.26313200 | -0.98564100 |
| H | -1.17925200 | -2.94502400 | -1.41917800 |
| C | -3.85173700 | -1.15144500 | -0.42934200 |
| H | -3.78774300 | -3.10252700 | -1.38196700 |
| C | -5.26745800 | -1.01694500 | -0.31960400 |
| H | -5.81932900 | -1.87143500 | -0.70234000 |
| C | -6.03621300 | -0.00100500 | 0.18283700  |
| C | -5.48350300 | 1.19784200  | 0.72558700  |
| N | -5.00744200 | 2.16690200  | 1.16178100  |
| C | -7.51635700 | -0.07643200 | 0.19592700  |
| O | -8.24777600 | 0.79051400  | 0.62574900  |
| O | -7.99209200 | -1.23728500 | -0.33245500 |
| H | -8.96232800 | -1.16977200 | -0.26957200 |
| C | 2.10069700  | 2.63686300  | 0.01172800  |
| C | 2.74968800  | 3.06847500  | 1.35134800  |
| C | 3.09815500  | 3.16039300  | -1.06404800 |
| H | 1.16920000  | 3.20812500  | -0.08846200 |
| C | 3.32664900  | 4.44955700  | 1.01978500  |
| H | 3.55403400  | 2.37171700  | 1.62369200  |
| H | 2.03425700  | 3.07778900  | 2.18040700  |
| C | 3.93944800  | 4.27229500  | -0.38682200 |
| H | 2.57731900  | 3.57525700  | -1.93200700 |
| H | 3.74159700  | 2.35415500  | -1.43056900 |
| H | 2.51665700  | 5.18649900  | 0.94420000  |
| H | 4.04669700  | 4.81482900  | 1.76173600  |
| H | 4.98425400  | 3.93582600  | -0.28905600 |
| C | 3.49435300  | -2.25733300 | -0.03285000 |
| C | 4.55897500  | -2.19756000 | -1.15511100 |
| C | 4.36988900  | -2.25168300 | 1.24073400  |
| H | 3.00705500  | -3.23883900 | -0.08007400 |
| C | 5.74555000  | -3.04446900 | -0.62824900 |
| H | 4.87421900  | -1.15741900 | -1.30423700 |
| H | 4.17187200  | -2.55081400 | -2.11650200 |
| C | 5.51660100  | -3.21238400 | 0.90371200  |
| H | 3.83496000  | -2.56904100 | 2.14045600  |
| H | 4.77063000  | -1.24583500 | 1.42028900  |
| H | 5.76688800  | -4.03545500 | -1.09635400 |
| H | 6.70745800  | -2.56646200 | -0.84429000 |
| H | 6.42505000  | -2.98281300 | 1.47998500  |
| O | 3.89092900  | 5.44651800  | -1.19386600 |

|   |            |             |             |
|---|------------|-------------|-------------|
| O | 5.05517700 | -4.52611900 | 1.23475200  |
| H | 4.43838200 | 6.12205200  | -0.76376700 |
| H | 5.73164300 | -5.15743700 | 0.94431300  |

**NS-1**

|   |             |             |             |
|---|-------------|-------------|-------------|
| C | -2.94262400 | -1.19341300 | -0.21955500 |
| C | -3.26596500 | 0.17983100  | -0.21300700 |
| C | -2.28670500 | 1.18850800  | -0.31876600 |
| C | -0.93757600 | 0.80149400  | -0.42905200 |
| C | -0.59410100 | -0.55709900 | -0.40070400 |
| C | -1.57744200 | -1.54822700 | -0.29032300 |
| H | -4.29371600 | 0.48117900  | -0.08012800 |
| H | -0.16113900 | 1.53436700  | -0.60193100 |
| H | -1.26609900 | -2.58051300 | -0.21682100 |
| C | 0.81221100  | -0.96221700 | -0.50355100 |
| C | 1.32883800  | -2.14328400 | -1.01623700 |
| S | 2.08989900  | 0.08157700  | 0.06371600  |
| C | 2.73107000  | -2.20462200 | -0.96465700 |
| H | 0.70530100  | -2.91838400 | -1.44601700 |
| C | 3.32764000  | -1.07339900 | -0.41323500 |
| H | 3.31596600  | -3.04238000 | -1.33148000 |
| C | 4.73680200  | -0.91536000 | -0.27142400 |
| H | 5.31057000  | -1.77083100 | -0.61828700 |
| C | 5.47991300  | 0.12488400  | 0.22268400  |
| C | 4.89900400  | 1.33114200  | 0.71734900  |
| N | 4.40196400  | 2.30667000  | 1.11419100  |
| C | 6.95905500  | 0.07026800  | 0.27390700  |
| O | 7.67003100  | 0.95854300  | 0.69530300  |
| O | 7.46448200  | -1.09908800 | -0.20805000 |
| H | 8.43158700  | -1.01438200 | -0.12266600 |
| N | -2.67301900 | 2.53283300  | -0.30621100 |
| N | -3.93620300 | -2.16621100 | -0.15207500 |
| C | -1.64773700 | 3.57627600  | -0.25854000 |
| C | -3.96128400 | 2.90626400  | -0.90234600 |
| C | -5.34482400 | -1.80077500 | -0.03789400 |
| C | -3.59406200 | -3.58447900 | -0.09105200 |
| H | -5.93105400 | -2.65020400 | -0.40514700 |
| H | -2.80147000 | -3.79219800 | -0.82010700 |
| H | -1.25736200 | 3.79772700  | -1.26823700 |
| H | -4.27555900 | 2.10718200  | -1.58340500 |
| C | -2.11378700 | 4.87630700  | 0.40216600  |
| C | -5.08101400 | 3.19453700  | 0.10622500  |
| H | -3.80340100 | 3.79213500  | -1.53136400 |
| H | -0.81096500 | 3.19261600  | 0.32870100  |
| H | -1.27341400 | 5.57801100  | 0.44382200  |
| H | -2.92171100 | 5.36656000  | -0.15046100 |
| H | -2.45730100 | 4.69251700  | 1.42551800  |
| H | -4.81971000 | 4.02719100  | 0.76574900  |
| H | -6.00726400 | 3.45437000  | -0.42131400 |
| H | -5.28226700 | 2.32395700  | 0.73932200  |
| C | -5.81588300 | -1.43627100 | 1.37853700  |
| C | -3.17818500 | -4.09970700 | 1.29530000  |
| H | -6.87062600 | -1.13589000 | 1.36232200  |
| H | -5.71750000 | -2.28911100 | 2.05810000  |
| H | -5.23088000 | -0.60944900 | 1.79347700  |
| H | -2.90091000 | -5.15940600 | 1.23891000  |

|   |             |             |             |
|---|-------------|-------------|-------------|
| H | -2.32129900 | -3.54263600 | 1.68666100  |
| H | -5.55548500 | -0.97377100 | -0.72676300 |
| H | -4.46996700 | -4.14413800 | -0.43665400 |
| H | -3.99809200 | -4.00237700 | 2.01443900  |

**NS-2**

|   |             |             |             |
|---|-------------|-------------|-------------|
| C | 0.38850700  | 0.80049200  | 0.24502000  |
| C | 0.17629700  | -0.58718800 | 0.25473900  |
| C | 1.28191400  | -1.44735700 | 0.14661200  |
| C | 2.58549300  | -0.94300900 | 0.04872400  |
| C | 2.76288700  | 0.44960200  | 0.05503300  |
| C | 1.67931200  | 1.33790400  | 0.14339500  |
| H | -0.46089700 | 1.47354900  | 0.31328400  |
| H | 1.12197700  | -2.51883800 | 0.08549900  |
| H | 3.77172100  | 0.85025700  | 0.03900600  |
| C | -1.17471800 | -1.14885100 | 0.35637800  |
| C | -1.54014600 | -2.40085400 | 0.82863800  |
| S | -2.57758400 | -0.23941200 | -0.14522500 |
| C | -2.92648200 | -2.62397100 | 0.79669700  |
| H | -0.82385200 | -3.11762300 | 1.21259600  |
| C | -3.66102500 | -1.55033900 | 0.30138800  |
| H | -3.40180600 | -3.53887500 | 1.13613800  |
| C | -5.08251600 | -1.55501800 | 0.18655500  |
| C | 3.74812900  | -1.85799700 | -0.05707600 |
| C | 3.79008300  | -3.07491400 | 0.64417200  |
| C | 4.85381400  | -1.54563600 | -0.86604100 |
| C | 4.87530600  | -3.93766200 | 0.54535000  |
| H | 2.96667000  | -3.34138500 | 1.30144900  |
| C | 5.94401700  | -2.40085000 | -0.97399300 |
| H | 4.84815100  | -0.62718000 | -1.44666700 |
| C | 5.97538500  | -3.61579000 | -0.26809000 |
| H | 4.88322500  | -4.86453300 | 1.11485800  |
| H | 6.78033300  | -2.13211100 | -1.61576600 |
| C | 1.89520700  | 2.80507400  | 0.15081200  |
| C | 1.09599800  | 3.66145100  | 0.92728600  |
| C | 2.90913500  | 3.39801200  | -0.62068300 |
| C | 1.29601900  | 5.03646600  | 0.93690100  |
| H | 0.31888200  | 3.24231200  | 1.56048600  |
| C | 3.11769000  | 4.77183700  | -0.62028500 |
| H | 3.53252500  | 2.77409000  | -1.25539200 |
| C | 2.31246400  | 5.61915400  | 0.16048000  |
| H | 0.66265600  | 5.66981200  | 1.55412500  |
| H | 3.90016600  | 5.20032100  | -1.24281700 |
| N | 7.09224500  | -4.45039100 | -0.32605000 |
| N | 2.47954900  | 7.00299200  | 0.11974700  |
| H | 2.12120600  | 7.50610700  | 0.92162500  |
| H | 3.40474400  | 7.32065300  | -0.14035200 |
| H | 6.91422700  | -5.42401600 | -0.11323100 |
| H | 7.66298700  | -4.34877100 | -1.15602000 |
| C | -5.95197900 | -0.59271400 | -0.25392400 |
| H | -5.54384400 | -2.48551900 | 0.50684500  |
| C | -7.41583900 | -0.82119900 | -0.28589300 |
| C | -5.52739400 | 0.69221300  | -0.70776000 |
| N | -5.15697700 | 1.73444200  | -1.07177000 |
| O | -8.23393600 | -0.00800100 | -0.66108000 |
| O | -7.76927800 | -2.05966700 | 0.15602300  |
| H | -8.74108700 | -2.08877800 | 0.08830100  |

NS-3

|   |             |             |             |
|---|-------------|-------------|-------------|
| C | -0.35318600 | -0.82877800 | -0.25499000 |
| C | -0.35133400 | 0.57483100  | -0.23114900 |
| C | 0.84539300  | 1.29902300  | -0.13442900 |
| C | 2.05051000  | 0.58162000  | -0.06657400 |
| C | 2.08443500  | -0.82204000 | -0.07477900 |
| C | 0.86970100  | -1.51496000 | -0.16656300 |
| H | -1.29255300 | 1.11373100  | -0.28427800 |
| H | 2.98787500  | 1.12902500  | -0.05520600 |
| H | 0.87290400  | -2.59881300 | -0.11582500 |
| C | -1.60598100 | -1.58493600 | -0.35059400 |
| C | -1.78493500 | -2.87567400 | -0.82683900 |
| S | -3.12503000 | -0.89641500 | 0.16475100  |
| C | -3.12221300 | -3.30244700 | -0.78717500 |
| H | -0.97272600 | -3.47651800 | -1.21863500 |
| C | -4.00498800 | -2.35193300 | -0.28178000 |
| H | -3.45862800 | -4.27651400 | -1.12817600 |
| C | -5.40873800 | -2.56823400 | -0.15849200 |
| H | -5.72861200 | -3.55587500 | -0.48021600 |
| C | -6.40942600 | -1.74768300 | 0.29127800  |
| C | -7.82223700 | -2.19206700 | 0.33040100  |
| O | -8.75076600 | -1.51145500 | 0.71287200  |
| O | -7.98985500 | -3.46837100 | -0.11404700 |
| H | -8.94607500 | -3.64176800 | -0.04083100 |
| C | -6.17874700 | -0.41529900 | 0.74811000  |
| C | 0.83785800  | 2.78099800  | -0.12496300 |
| C | -0.09318300 | 3.51990800  | -0.87264700 |
| C | 1.76390100  | 3.51599000  | 0.63245200  |
| C | -0.10816800 | 4.90879500  | -0.86641200 |
| H | -0.80899200 | 2.99885400  | -1.50285300 |
| C | 1.76353500  | 4.90498400  | 0.65286900  |
| H | 2.49165800  | 2.98974900  | 1.24460000  |
| C | 0.81605300  | 5.64599400  | -0.09067000 |
| H | -0.84062800 | 5.41985800  | -1.47954200 |
| H | 2.49946800  | 5.41342800  | 1.26429100  |
| N | 0.78961000  | 7.03247000  | -0.05368000 |
| C | 1.88002800  | 7.75165100  | 0.58139300  |
| C | -0.08819600 | 7.75627700  | -0.95675500 |
| H | 1.68618900  | 8.82405400  | 0.51718500  |
| H | 1.95797000  | 7.49356000  | 1.64480700  |
| H | 2.85545400  | 7.54926800  | 0.11069600  |
| H | -0.00219500 | 8.82622300  | -0.75744400 |
| H | 0.15234600  | 7.58325100  | -2.01815400 |
| H | -1.13564200 | 7.47377000  | -0.79687300 |
| N | -5.96682800 | 0.66955900  | 1.11444100  |
| C | 3.37082300  | -1.55396000 | 0.00874100  |
| C | 3.58692900  | -2.74811000 | -0.69713500 |
| C | 4.43583000  | -1.08485500 | 0.79415300  |
| C | 4.78935800  | -3.44075700 | -0.62592300 |
| H | 2.80569700  | -3.13220600 | -1.34806100 |
| C | 5.64470500  | -1.76417300 | 0.87959100  |
| H | 4.31082500  | -0.17446500 | 1.37444900  |
| C | 5.85476400  | -2.97338100 | 0.17752900  |
| H | 4.90041200  | -4.34498300 | -1.21235400 |
| H | 6.42535600  | -1.35255300 | 1.50809300  |
| N | 7.04936700  | -3.67366200 | 0.27995400  |

|   |            |             |             |
|---|------------|-------------|-------------|
| C | 7.29289200 | -4.80114100 | -0.60297700 |
| C | 8.18871700 | -3.04745100 | 0.92872700  |
| H | 7.96517000 | -2.81149800 | 1.97615700  |
| H | 9.03024100 | -3.74292500 | 0.92181000  |
| H | 8.50609900 | -2.11699000 | 0.43107600  |
| H | 7.30312900 | -4.51817600 | -1.66811900 |
| H | 8.26019500 | -5.24421700 | -0.35797300 |
| H | 6.53085000 | -5.57775200 | -0.46664300 |

**NS-4**

|   |             |             |             |
|---|-------------|-------------|-------------|
| C | -0.57690900 | -1.13660200 | -0.29659600 |
| C | -0.89615700 | 0.23021000  | -0.25920500 |
| C | 0.10544300  | 1.20266600  | -0.14359100 |
| C | 1.44198900  | 0.78326900  | -0.07378300 |
| C | 1.79689400  | -0.57570600 | -0.10087900 |
| C | 0.77033000  | -1.52434700 | -0.20783600 |
| H | -1.93457700 | 0.54248900  | -0.31637600 |
| H | 2.22728200  | 1.53219600  | -0.04485200 |
| H | 1.01980400  | -2.57967600 | -0.16991400 |
| C | -1.62319500 | -2.15837300 | -0.40832700 |
| C | -1.50283500 | -3.44630500 | -0.90862600 |
| S | -3.25749200 | -1.84537200 | 0.11841900  |
| C | -2.70711800 | -4.16881500 | -0.87818100 |
| H | -0.57597400 | -3.83786400 | -1.31100900 |
| C | -3.78188300 | -3.45516900 | -0.35579100 |
| H | -2.81271500 | -5.18757400 | -1.23756000 |
| C | -5.09912700 | -3.98919500 | -0.23672900 |
| H | -5.18661800 | -5.01741900 | -0.57779200 |
| C | -6.25765600 | -3.42696700 | 0.22941600  |
| C | -6.33330200 | -2.08601800 | 0.71261300  |
| N | -6.36977600 | -0.98857400 | 1.10015900  |
| C | -7.53274800 | -4.18189500 | 0.26066100  |
| O | -8.58893200 | -3.73702800 | 0.65779700  |
| O | -7.40778200 | -5.45346000 | -0.20942400 |
| H | -8.29878000 | -5.84218600 | -0.13949200 |
| C | -0.23977600 | 2.64775300  | -0.11688500 |
| C | -1.27912800 | 3.16158900  | -0.91089500 |
| C | 0.46140200  | 3.54343700  | 0.70620200  |
| C | -1.60459300 | 4.51527700  | -0.88107200 |
| H | -1.82267000 | 2.49740000  | -1.57735800 |
| C | 0.13582800  | 4.89819000  | 0.73496500  |
| H | 1.25203800  | 3.17061500  | 1.35156800  |
| C | -0.90043400 | 5.40465100  | -0.05596200 |
| H | -2.40947100 | 4.88407400  | -1.51153200 |
| H | 0.67376400  | 5.58522200  | 1.38115200  |
| C | 3.21501500  | -0.99549600 | -0.01781600 |
| C | 3.69969600  | -2.10808900 | -0.72364300 |
| C | 4.14567400  | -0.30183600 | 0.77214100  |
| C | 5.02668100  | -2.51124900 | -0.64885400 |
| H | 3.02656600  | -2.66674900 | -1.36901600 |
| C | 5.47717400  | -0.68733600 | 0.85645400  |
| H | 3.81869900  | 0.55463300  | 1.35599500  |
| C | 5.96538300  | -1.81110000 | 0.14688500  |
| H | 5.32923600  | -3.38455700 | -1.21422700 |
| H | 6.14153800  | -0.09981900 | 1.47874300  |
| N | -1.20553400 | 6.81387700  | 0.00645200  |
| N | 7.29207100  | -2.20474200 | 0.22680100  |

|   |             |             |             |
|---|-------------|-------------|-------------|
| C | -2.55299200 | 7.09519000  | 0.52933400  |
| C | -2.74252600 | 6.61403900  | 1.96658500  |
| C | 8.92138300  | -0.32396300 | 0.57485000  |
| H | -3.73389800 | 6.90479900  | 2.33178500  |
| H | -2.66348000 | 5.52505800  | 2.04290700  |
| H | -1.98582900 | 7.05773800  | 2.62242900  |
| H | 8.19302600  | 0.44814800  | 0.30756400  |
| H | 9.61940400  | 0.09925400  | 1.30700700  |
| H | 9.48882200  | -0.57530500 | -0.32834400 |
| C | -0.94273500 | 7.52177600  | -1.25697600 |
| C | 8.22806200  | -1.56731200 | 1.14820100  |
| C | 7.82607100  | -3.27783200 | -0.60644800 |
| C | 0.52979000  | 7.48540300  | -1.66187900 |
| H | 0.86802900  | 6.46468600  | -1.86653800 |
| H | 0.68425600  | 8.07948900  | -2.56976000 |
| H | 1.15691100  | 7.89851000  | -0.86461700 |
| C | 7.66335700  | -4.67908400 | -0.00186300 |
| H | 6.60796700  | -4.92191500 | 0.15735800  |
| H | 8.09528700  | -5.43728300 | -0.66596800 |
| H | 8.17180700  | -4.74751000 | 0.96647500  |
| H | -2.68153600 | 8.18392100  | 0.49548000  |
| H | -3.34662000 | 6.66777900  | -0.11300900 |
| H | -1.56533700 | 7.13644100  | -2.08741500 |
| H | -1.24602000 | 8.56435200  | -1.10211100 |
| H | 7.70773800  | -1.31992700 | 2.07973100  |
| H | 8.98292900  | -2.31455500 | 1.41976000  |
| H | 7.36186500  | -3.23246400 | -1.59753800 |
| H | 8.89044600  | -3.07063400 | -0.76791000 |

### NS-5

|   |             |             |             |
|---|-------------|-------------|-------------|
| C | -0.63288500 | -0.72088800 | 0.17040700  |
| C | -0.41054700 | 0.66095300  | 0.26798200  |
| C | 0.89776700  | 1.16663200  | 0.29607300  |
| C | 1.98167000  | 0.27792600  | 0.23275300  |
| C | 1.76770600  | -1.10176500 | 0.10770400  |
| C | 0.45790500  | -1.59871800 | 0.07180100  |
| H | -1.24733300 | 1.34615300  | 0.34412300  |
| H | 2.99372700  | 0.66085200  | 0.28698000  |
| H | 0.29414600  | -2.66091400 | -0.06426500 |
| C | -1.99514900 | -1.26550100 | 0.13785300  |
| C | -2.41030800 | -2.52840700 | 0.53152000  |
| S | -3.33830300 | -0.32001100 | -0.44993800 |
| C | -3.79171800 | -2.73106800 | 0.37393500  |
| H | -1.73496500 | -3.26663400 | 0.94818900  |
| C | -4.46894300 | -1.63150100 | -0.14539100 |
| H | -4.30417400 | -3.65049400 | 0.63883900  |
| C | -5.87529400 | -1.61397300 | -0.38497400 |
| H | -6.37415600 | -2.54477200 | -0.12814100 |
| C | -6.69007700 | -0.63087700 | -0.87956800 |
| C | -6.21036900 | 0.65515900  | -1.27132200 |
| N | -5.79521000 | 1.69678600  | -1.58522400 |
| C | -8.14860900 | -0.83750000 | -1.04502100 |
| O | -8.91901600 | -0.00579000 | -1.47602800 |
| O | -8.55545100 | -2.07791400 | -0.65900300 |
| H | -9.51772700 | -2.09263500 | -0.81294000 |
| N | 1.12439300  | 2.55723400  | 0.42094000  |
| N | 2.86997400  | -1.98914800 | 0.03059000  |

|   |             |             |             |
|---|-------------|-------------|-------------|
| C | 0.26867400  | 3.35383200  | 1.23766200  |
| C | -0.22531600 | 4.57740400  | 0.76168600  |
| C | -0.08201300 | 2.92907900  | 2.52825400  |
| C | -1.04988300 | 5.36127800  | 1.56679900  |
| H | 0.03902600  | 4.90591400  | -0.23849900 |
| C | -0.92193800 | 3.71076000  | 3.31964500  |
| H | 0.30581600  | 1.98708800  | 2.90355700  |
| C | -1.40698100 | 4.93181800  | 2.84663500  |
| H | -1.42775100 | 6.30510600  | 1.18311100  |
| H | -1.18676600 | 3.36798500  | 4.31642400  |
| H | -2.05757700 | 5.54091700  | 3.46754000  |
| C | 2.20634200  | 3.17715100  | -0.26627400 |
| C | 3.00750200  | 4.12732700  | 0.38570300  |
| C | 2.47907200  | 2.85812800  | -1.60573400 |
| C | 4.05445600  | 4.74755700  | -0.29362300 |
| H | 2.80255300  | 4.37577500  | 1.42220900  |
| C | 3.54000800  | 3.46970000  | -2.27097000 |
| H | 1.85357700  | 2.13514800  | -2.11976900 |
| C | 4.33115900  | 4.42019000  | -1.62256700 |
| H | 4.66482000  | 5.48182100  | 0.22555100  |
| H | 3.73744400  | 3.21208200  | -3.30817300 |
| H | 5.15218400  | 4.90075500  | -2.14683100 |
| C | 4.02527000  | -1.63358800 | -0.72255200 |
| C | 5.30852300  | -1.86327900 | -0.20291200 |
| C | 3.89699200  | -1.05659000 | -1.99549600 |
| C | 6.43760300  | -1.52834700 | -0.94807800 |
| H | 5.41289000  | -2.30449200 | 0.78332000  |
| C | 5.03183200  | -0.70752800 | -2.72542300 |
| H | 2.90679100  | -0.88781300 | -2.40700500 |
| C | 6.30769200  | -0.94476000 | -2.21007300 |
| H | 7.42437200  | -1.71251100 | -0.53147500 |
| H | 4.91570400  | -0.26172600 | -3.70976900 |
| H | 7.18996900  | -0.67800400 | -2.78477200 |
| C | 2.82226700  | -3.24785100 | 0.69294900  |
| C | 3.28257900  | -4.40765600 | 0.04992700  |
| C | 2.32005900  | -3.34759900 | 2.00063000  |
| C | 3.24579200  | -5.63674200 | 0.70632500  |
| H | 3.66830500  | -4.33818200 | -0.96219200 |
| C | 2.27024900  | -4.58392200 | 2.64195500  |
| H | 1.97364900  | -2.45291300 | 2.50829600  |
| C | 2.73556400  | -5.73513400 | 2.00242100  |
| H | 3.60674800  | -6.52450200 | 0.19363000  |
| H | 1.88037500  | -4.64273200 | 3.65488200  |
| H | 2.70291200  | -6.69574700 | 2.50844100  |

### NS-6

|   |             |             |             |
|---|-------------|-------------|-------------|
| C | 0.29254600  | 2.40377300  | -0.32251400 |
| C | 1.27041600  | 1.39703300  | -0.29127900 |
| C | 0.91661700  | 0.04320200  | -0.20503100 |
| C | -0.44674000 | -0.28677600 | -0.15561900 |
| C | -1.44946400 | 0.69505400  | -0.19285500 |
| C | -1.06289300 | 2.03930300  | -0.27312200 |
| H | 2.31837000  | 1.66522800  | -0.38431600 |
| H | -0.73266600 | -1.32656000 | -0.03160000 |
| H | -1.82511500 | 2.81125600  | -0.29676100 |
| C | 0.66311100  | 3.81910900  | -0.42935500 |



|   |             |             |             |
|---|-------------|-------------|-------------|
| C | -0.08294900 | 4.85797000  | -0.96478600 |
| S | 2.20034600  | 4.39491800  | 0.16187200  |
| C | 0.57477000  | 6.09850600  | -0.90987700 |
| H | -1.06024800 | 4.71371000  | -1.41042300 |
| C | 1.83973700  | 6.04314100  | -0.33209700 |
| H | 0.15593300  | 7.02449000  | -1.29099800 |
| C | 2.68742100  | 7.18033900  | -0.17810200 |
| H | 2.25017400  | 8.10520600  | -0.54505100 |
| C | 3.94579000  | 7.29650000  | 0.34910800  |
| C | 4.67437200  | 6.18780100  | 0.87590300  |
| N | 5.24726400  | 5.26649400  | 1.29888000  |
| C | 4.64962800  | 8.59986300  | 0.40797000  |
| O | 5.76313100  | 8.76270200  | 0.86017900  |
| O | 3.91330200  | 9.62321100  | -0.10509900 |
| H | 4.47323000  | 10.41552800 | -0.01216900 |
| C | 1.95767600  | -1.01166300 | -0.16421500 |
| C | 3.17797000  | -0.80958400 | 0.50338800  |
| C | 1.76438300  | -2.25365000 | -0.79276300 |
| C | 4.15398900  | -1.79793900 | 0.55072700  |
| H | 3.35305700  | 0.12344600  | 1.03184700  |
| C | 2.73998800  | -3.24313800 | -0.76625400 |
| H | 0.84960800  | -2.43525900 | -1.35041000 |
| C | 3.95367300  | -3.03395200 | -0.08831000 |
| H | 5.07557100  | -1.61951800 | 1.09468100  |
| H | 2.57119800  | -4.18203200 | -1.28319300 |
| C | -2.88315800 | 0.32013700  | -0.12602300 |
| C | -3.81449500 | 1.10471700  | 0.57546400  |
| C | -3.36468200 | -0.83615000 | -0.76323000 |
| C | -5.15734600 | 0.75224900  | 0.64599100  |
| H | -3.47520600 | 1.98513000  | 1.11443100  |
| C | -4.70803600 | -1.18992200 | -0.71297800 |
| H | -2.68211000 | -1.45035200 | -1.34415800 |
| C | -5.62956000 | -0.40206700 | -0.00204700 |
| H | -5.84757500 | 1.36464700  | 1.21691000  |
| H | -5.05357000 | -2.07599500 | -1.23533200 |
| N | 4.94777400  | -4.04037400 | -0.05204000 |
| N | -6.99730900 | -0.76246000 | 0.06063700  |
| C | 4.57875300  | -5.41176100 | 0.04416800  |
| C | 5.22186500  | -6.37686000 | -0.74688300 |
| C | 3.57378900  | -5.82055800 | 0.93541100  |
| C | 4.86934600  | -7.72098600 | -0.64057600 |
| H | 5.99670200  | -6.06631100 | -1.44061200 |
| C | 3.21552600  | -7.16461800 | 1.02159200  |
| H | 3.07948000  | -5.08074300 | 1.55712100  |
| C | 3.86217500  | -8.12367500 | 0.23898500  |
| H | 5.37764500  | -8.45505300 | -1.26034500 |
| H | 2.43600500  | -7.46395000 | 1.71740100  |
| H | 3.58553900  | -9.17141100 | 0.31448400  |
| C | 6.32718900  | -3.68971100 | -0.11099500 |
| C | 7.25319700  | -4.30929800 | 0.74255500  |
| C | 6.78036900  | -2.72600700 | -1.02552500 |
| C | 8.60430500  | -3.97420800 | 0.67442500  |
| H | 6.90739700  | -5.05113100 | 1.45547600  |
| C | 8.13048800  | -2.38366300 | -1.07326000 |
| H | 6.07035000  | -2.24876300 | -1.69357300 |
| C | 9.05121800  | -3.00730500 | -0.22853100 |

|   |              |             |             |
|---|--------------|-------------|-------------|
| H | 9.30827700   | -4.46280700 | 1.34297200  |
| H | 8.46461700   | -1.63380300 | -1.78542600 |
| H | 10.10364600  | -2.74220500 | -0.27285900 |
| C | -7.37385500  | -2.13122600 | 0.16854600  |
| C | -6.69431700  | -2.99160100 | 1.04556000  |
| C | -8.43554500  | -2.63790300 | -0.59741200 |
| C | -7.06498400  | -4.33155900 | 1.14246600  |
| H | -5.87854700  | -2.60392500 | 1.64755800  |
| C | -8.81086700  | -3.97495300 | -0.48000600 |
| H | -8.96162700  | -1.97879400 | -1.28073200 |
| C | -8.12669600  | -4.83131400 | 0.38525200  |
| H | -6.52857600  | -4.98389400 | 1.82659800  |
| H | -9.63524900  | -4.35091400 | -1.08028600 |
| H | -8.41756600  | -5.87451800 | 0.46903500  |
| C | -8.00565100  | 0.24151500  | 0.02032800  |
| C | -7.91809800  | 1.30461400  | -0.89256900 |
| C | -9.10608900  | 0.17852700  | 0.88968200  |
| C | -8.90631000  | 2.28682400  | -0.92393500 |
| H | -7.07464700  | 1.35383000  | -1.57404100 |
| C | -10.09863500 | 1.15551200  | 0.83843600  |
| H | -9.17692000  | -0.63821800 | 1.60100400  |
| C | -10.00405900 | 2.21753900  | -0.06342100 |
| H | -8.82345700  | 3.10263500  | -1.63736400 |
| H | -10.94387900 | 1.09151400  | 1.51868300  |
| H | -10.77620700 | 2.98085100  | -0.09581600 |

**NS-7**

|   |             |             |             |
|---|-------------|-------------|-------------|
| C | 1.25066800  | 2.27341400  | -0.15552300 |
| C | 1.06959500  | 0.88400200  | -0.16386300 |
| C | -0.23922300 | 0.37890800  | -0.16278700 |
| C | -1.35451700 | 1.23039600  | -0.15080700 |
| C | -1.14226100 | 2.61468100  | -0.13454900 |
| C | 0.15529700  | 3.15116300  | -0.13798400 |
| H | 2.25694900  | 2.67723400  | -0.20989100 |
| H | -0.39304200 | -0.69466600 | -0.11480500 |
| H | -1.99570500 | 3.28476600  | -0.11913300 |
| C | 0.34788600  | 4.60610700  | -0.13918200 |
| C | -0.50567800 | 5.58042200  | -0.62959400 |
| S | 1.78546800  | 5.31894700  | 0.54448700  |
| C | -0.00667000 | 6.88576800  | -0.46736000 |
| H | -1.44548800 | 5.35256800  | -1.11926300 |
| C | 1.23783700  | 6.94129000  | 0.15071600  |
| H | -0.52583000 | 7.77897000  | -0.79964500 |
| C | 1.93870300  | 8.15844700  | 0.41614500  |
| H | 1.40606100  | 9.05070300  | 0.09794200  |
| C | 3.15647700  | 8.37685100  | 0.99872500  |
| C | 3.99060600  | 7.31987700  | 1.47346500  |
| C | 3.70437600  | 9.74491800  | 1.17958900  |
| O | 4.77595600  | 9.99241500  | 1.68878800  |
| O | 2.87242300  | 10.71197600 | 0.71011300  |
| H | 3.33013400  | 11.55575700 | 0.87997400  |
| N | 4.64678300  | 6.43472000  | 1.84976900  |
| C | 2.23939400  | -0.02992300 | -0.17125100 |
| C | 3.40913000  | 0.28265300  | 0.54280400  |
| C | 2.21573900  | -1.23502100 | -0.89379400 |
| C | 4.50641100  | -0.57242300 | 0.54244700  |
| H | 3.44995500  | 1.18962800  | 1.13866700  |

|   |              |             |             |
|---|--------------|-------------|-------------|
| C | 3.31293300   | -2.08986300 | -0.91078800 |
| H | 1.34080100   | -1.48976000 | -1.48474800 |
| C | 4.46978500   | -1.76761500 | -0.18827100 |
| H | 5.39173000   | -0.32094300 | 1.11800300  |
| H | 3.28198700   | -3.00484600 | -1.49412400 |
| C | -2.73212500  | 0.67656100  | -0.13232000 |
| C | -3.74803600  | 1.27854500  | 0.62970600  |
| C | -3.06415400  | -0.46721200 | -0.87819000 |
| C | -5.03896700  | 0.76056200  | 0.65148900  |
| H | -3.51600300  | 2.14158000  | 1.24688000  |
| C | -4.35588100  | -0.98403400 | -0.87412300 |
| H | -2.30996000  | -0.93758200 | -1.50234600 |
| C | -5.35696000  | -0.37499800 | -0.10560500 |
| H | -5.80309400  | 1.22779000  | 1.26490400  |
| H | -4.59635100  | -1.85496400 | -1.47590100 |
| N | 5.59718200   | -2.64660200 | -0.19802700 |
| C | 6.88160200   | -2.12523000 | -0.47898800 |
| C | 7.03592300   | -1.09103300 | -1.42180500 |
| C | 8.01927200   | -2.61808200 | 0.18926500  |
| C | 8.29165700   | -0.56549400 | -1.69316100 |
| H | 6.16715600   | -0.70815000 | -1.94550000 |
| C | 9.27783800   | -2.10237400 | -0.08702900 |
| H | 7.91042700   | -3.39972800 | 0.93297300  |
| C | 9.40389900   | -1.07892100 | -1.02647500 |
| H | 8.42528700   | 0.22399400  | -2.42242600 |
| H | 10.15968800  | -2.46738000 | 0.42496400  |
| C | 5.40537200   | -4.02186700 | 0.06601600  |
| C | 4.44867600   | -4.43415500 | 1.01372900  |
| C | 6.15006200   | -4.99872900 | -0.62371900 |
| C | 4.24059500   | -5.78295600 | 1.26572000  |
| H | 3.87692500   | -3.68992000 | 1.55674200  |
| C | 5.95183900   | -6.34816600 | -0.36711400 |
| H | 6.87669400   | -4.69480500 | -1.36902700 |
| C | 4.99620800   | -6.73022500 | 0.57471200  |
| H | 3.51470900   | -6.11276400 | 1.99876000  |
| H | 6.51189900   | -7.10905700 | -0.89669000 |
| N | -6.68519600  | -0.90429200 | -0.09404200 |
| C | -7.77806700  | -0.03646800 | -0.31872800 |
| C | -8.99024500  | -0.20867200 | 0.37797000  |
| C | -7.66004200  | 1.02824400  | -1.23295500 |
| C | -10.05695100 | 0.65231000  | 0.16081900  |
| H | -9.08764500  | -1.01327900 | 1.09837600  |
| C | -8.72102600  | 1.89726700  | -1.44512700 |
| H | -6.73438700  | 1.16389600  | -1.78101600 |
| C | -9.91308200  | 1.70097300  | -0.74793300 |
| H | -10.99100400 | 0.53586000  | 0.69661300  |
| H | -8.64614000  | 2.71446900  | -2.15193400 |
| C | -6.87935100  | -2.28478300 | 0.14296500  |
| C | -7.88565500  | -2.99724700 | -0.53795000 |
| C | -6.05186600  | -2.97006600 | 1.05307300  |
| C | -8.06759200  | -4.35386300 | -0.30796200 |
| H | -8.51668400  | -2.48471500 | -1.25562500 |
| C | -6.22409700  | -4.32885600 | 1.27801200  |
| H | -5.27966000  | -2.42877700 | 1.58822400  |
| C | -7.23332400  | -5.00974500 | 0.59742000  |
| H | -8.83230100  | -4.91507200 | -0.83077000 |

|   |              |             |             |
|---|--------------|-------------|-------------|
| H | -5.60061500  | -4.86598100 | 1.98215500  |
| N | 10.73060100  | -0.53266800 | -1.31831100 |
| N | 4.78025100   | -8.15305800 | 0.84122200  |
| N | -7.41944600  | -6.44223600 | 0.83632800  |
| N | -11.03377800 | 2.61529300  | -0.97223100 |
| O | 5.47675500   | -8.96302800 | 0.22707400  |
| O | 3.91410600   | -8.45665300 | 1.66357600  |
| O | 10.80549700  | 0.37882300  | -2.14388400 |
| O | 11.69334300  | -1.01831400 | -0.72216200 |
| O | -6.65310000  | -6.99479200 | 1.62717000  |
| O | -8.33108100  | -7.00947700 | 0.23207800  |
| O | -12.07897200 | 2.40238800  | -0.35560800 |
| O | -10.86503000 | 3.54439700  | -1.76416900 |

**NS-8**

|   |             |             |             |
|---|-------------|-------------|-------------|
| C | 1.25822000  | 2.06546900  | -0.26907900 |
| C | 1.04401400  | 0.68414000  | -0.15902500 |
| C | -0.27940800 | 0.21925900  | -0.10265400 |
| C | -1.37740200 | 1.09297200  | -0.15539600 |
| C | -1.12865000 | 2.46816400  | -0.25806900 |
| C | 0.18315600  | 2.96709700  | -0.31532200 |
| H | 2.27382100  | 2.43630300  | -0.36846600 |
| H | -0.45832000 | -0.84187100 | 0.03985700  |
| H | -1.96564000 | 3.15779000  | -0.29353000 |
| C | 0.40881200  | 4.41019100  | -0.44713200 |
| C | -0.44845600 | 5.36353700  | -0.97657200 |
| S | 1.89500000  | 5.14399000  | 0.09889600  |
| C | 0.08382400  | 6.66323000  | -0.95217800 |
| H | -1.41682200 | 5.11745000  | -1.39616600 |
| C | 1.36187000  | 6.74156600  | -0.40588900 |
| H | -0.43363600 | 7.53786700  | -1.33359300 |
| C | 2.09620300  | 7.95827600  | -0.28869500 |
| H | 1.55840900  | 8.83059600  | -0.65075700 |
| C | 3.35269000  | 8.20603800  | 0.19741100  |
| C | 4.20572500  | 7.18247900  | 0.70925800  |
| C | 3.92348000  | 9.57330900  | 0.22139200  |
| O | 5.02938500  | 9.85303700  | 0.63392300  |
| O | 3.07183700  | 10.51248700 | -0.27502100 |
| H | 3.55317500  | 11.35720800 | -0.20724000 |
| N | 4.88362200  | 6.32959900  | 1.12043900  |
| C | 2.18662700  | -0.25750000 | -0.09921300 |
| C | 3.37927800  | 0.07942100  | 0.56448700  |
| C | 2.12554600  | -1.52437600 | -0.70393300 |
| C | 4.45228800  | -0.80028500 | 0.62940000  |
| H | 3.45664300  | 1.03452300  | 1.07694100  |
| C | 3.19746300  | -2.40764600 | -0.66004000 |
| H | 1.23530800  | -1.81099900 | -1.25753100 |
| C | 4.38522200  | -2.06415200 | 0.01278900  |
| H | 5.34771000  | -0.51592700 | 1.17145400  |
| H | 3.12476300  | -3.36697200 | -1.16116000 |
| C | -2.76500200 | 0.57557100  | -0.08141900 |
| C | -3.77477500 | 1.27323900  | 0.60365400  |
| C | -3.12673700 | -0.63597200 | -0.69446200 |
| C | -5.07455400 | 0.78817300  | 0.68136500  |
| H | -3.52925900 | 2.19429200  | 1.12568700  |
| C | -4.42623800 | -1.12523100 | -0.63671800 |
| H | -2.38449500 | -1.18981800 | -1.26304300 |

|   |              |              |             |
|---|--------------|--------------|-------------|
| C | -5.42855900  | -0.42323400  | 0.05826100  |
| H | -5.82252700  | 1.33936100   | 1.24140500  |
| H | -4.67533200  | -2.05224700  | -1.14212300 |
| N | 5.47403800   | -2.95776300  | 0.06816800  |
| C | 6.81422600   | -2.47029900  | 0.11519600  |
| C | 7.25365400   | -1.47965100  | -0.76917900 |
| C | 7.72812500   | -2.98884900  | 1.04865900  |
| C | 8.56312000   | -0.99653000  | -0.71914200 |
| H | 6.56239900   | -1.07281300  | -1.50086100 |
| C | 9.03740600   | -2.53126900  | 1.08877600  |
| H | 7.40228200   | -3.75782000  | 1.74224000  |
| C | 9.46638000   | -1.52534200  | 0.20978900  |
| H | 8.86516700   | -0.22236700  | -1.41519700 |
| H | 9.74662700   | -2.92846600  | 1.80830400  |
| C | 5.25957200   | -4.36737000  | 0.06030200  |
| C | 4.31525500   | -4.95766200  | 0.91910900  |
| C | 6.00195800   | -5.19794400  | -0.78510700 |
| C | 4.11465400   | -6.33053500  | 0.91602200  |
| H | 3.73698800   | -4.32866500  | 1.58882400  |
| C | 5.82212500   | -6.58312600  | -0.77768100 |
| H | 6.73607800   | -4.75765400  | -1.45277200 |
| C | 4.86962300   | -7.15781600  | 0.07076200  |
| H | 3.38634300   | -6.79030400  | 1.57687700  |
| H | 6.42000400   | -7.19491100  | -1.44363200 |
| O | 10.76949300  | -1.13691900  | 0.34062400  |
| O | 4.60290300   | -8.49572100  | 0.15452900  |
| C | 11.24895100  | -0.10713500  | -0.50854300 |
| C | 5.33985400   | -9.37694900  | -0.67613700 |
| H | 4.97516300   | -10.38019600 | -0.44771100 |
| H | 5.17251600   | -9.16485400  | -1.74080300 |
| H | 6.41664200   | -9.32642500  | -0.46531600 |
| H | 10.68879300  | 0.82677200   | -0.36739000 |
| H | 12.29157000  | 0.05220000   | -0.22729100 |
| H | 11.20029500  | -0.39920600  | -1.56628500 |
| N | -6.74634700  | -0.92017500  | 0.13198100  |
| C | -7.85822000  | -0.02888200  | 0.18390400  |
| C | -8.88158500  | -0.22029800  | 1.12844700  |
| C | -7.96669300  | 1.04304700   | -0.70838400 |
| C | -9.97652800  | 0.63084200   | 1.17057300  |
| H | -8.81201200  | -1.04753700  | 1.82795900  |
| C | -9.05439300  | 1.91795300   | -0.65741000 |
| H | -7.18885900  | 1.20043100   | -1.44933800 |
| C | -10.07135300 | 1.71206900   | 0.28156300  |
| H | -10.76953200 | 0.48594100   | 1.89764700  |
| H | -9.10208700  | 2.74004700   | -1.36251400 |
| C | -6.99342700  | -2.32473500  | 0.13738500  |
| C | -7.97337400  | -2.88099300  | -0.69080500 |
| C | -6.27397200  | -3.17923300  | 0.99171600  |
| C | -8.24385700  | -4.25124900  | -0.67049200 |
| H | -8.53819700  | -2.23455200  | -1.35541500 |
| C | -6.52085200  | -4.54443500  | 1.00095400  |
| H | -5.51574100  | -2.76301300  | 1.64777100  |
| C | -7.51181700  | -5.09381900  | 0.17314200  |
| H | -9.01460800  | -4.64528800  | -1.32308300 |
| H | -5.96710900  | -5.20793600  | 1.65793200  |
| O | -11.18333300 | 2.49533000   | 0.41373400  |

|   |              |             |             |
|---|--------------|-------------|-------------|
| O | -7.68331800  | -6.44606200 | 0.26805600  |
| C | -11.33109800 | 3.60000000  | -0.46243500 |
| C | -8.67133600  | -7.05349700 | -0.54741700 |
| H | -8.64025100  | -8.11915400 | -0.31293200 |
| H | -9.67409100  | -6.66332600 | -0.32680200 |
| H | -8.45790100  | -6.91156700 | -1.61544800 |
| H | -11.38514800 | 3.28015300  | -1.51183400 |
| H | -12.27099200 | 4.08029000  | -0.18402500 |
| H | -10.50925000 | 4.31979600  | -0.34857200 |

**NS-9**

|   |             |             |             |
|---|-------------|-------------|-------------|
| C | 0.29020000  | 2.39543900  | -0.28554700 |
| C | 1.26776600  | 1.38800900  | -0.27036200 |
| C | 0.91442800  | 0.03331600  | -0.20958500 |
| C | -0.44746200 | -0.30166100 | -0.17081500 |
| C | -1.44839000 | 0.68167300  | -0.19001300 |
| C | -1.06432400 | 2.02742700  | -0.24360300 |
| H | 2.31574900  | 1.65897300  | -0.35432500 |
| H | -0.73320600 | -1.34398700 | -0.06924800 |
| H | -1.82733700 | 2.79898900  | -0.25273100 |
| C | 0.66080500  | 3.81319100  | -0.36346500 |
| C | -0.07763400 | 4.85992100  | -0.89151300 |
| S | 2.18864000  | 4.37763900  | 0.26096800  |
| C | 0.57961700  | 6.10008400  | -0.80492400 |
| H | -1.04819500 | 4.72442600  | -1.35457900 |
| C | 1.83476000  | 6.03364300  | -0.20898300 |
| H | 0.16634700  | 7.03259800  | -1.17573700 |
| C | 2.68212000  | 7.16784800  | -0.01936400 |
| H | 2.25356900  | 8.10037100  | -0.37694100 |
| C | 3.92994700  | 7.26873200  | 0.53243000  |
| C | 4.64313500  | 6.14619600  | 1.05136800  |
| N | 5.19987800  | 5.21146200  | 1.46616100  |
| C | 4.63913200  | 8.56854200  | 0.62998700  |
| O | 5.74383900  | 8.71448600  | 1.10737200  |
| O | 3.91726400  | 9.60325500  | 0.12208900  |
| H | 4.47656800  | 10.39289200 | 0.23959700  |
| C | 1.95851100  | -1.02135700 | -0.18467200 |
| C | 3.16926800  | -0.82991600 | 0.50292500  |
| C | 1.77022800  | -2.24552000 | -0.84849400 |
| C | 4.14663200  | -1.81936500 | 0.53514100  |
| H | 3.33526800  | 0.09097800  | 1.05434800  |
| C | 2.74843200  | -3.23421900 | -0.83427000 |
| H | 0.86112300  | -2.41253700 | -1.41906700 |
| C | 3.94767200  | -3.03311300 | -0.13699800 |
| H | 5.06523000  | -1.65782400 | 1.09031000  |
| H | 2.59129500  | -4.16369800 | -1.37245400 |
| C | -2.88343900 | 0.30522400  | -0.13229500 |
| C | -3.80682700 | 1.06485900  | 0.60594700  |
| C | -3.36480900 | -0.82409500 | -0.81595200 |
| C | -5.15090000 | 0.71092100  | 0.66584100  |
| H | -3.46170800 | 1.92240500  | 1.17640200  |
| C | -4.71008300 | -1.17622700 | -0.77473700 |
| H | -2.68334200 | -1.41457400 | -1.42162800 |
| C | -5.61862400 | -0.41282400 | -0.02901800 |
| H | -5.84285500 | 1.29886400  | 1.26068300  |
| H | -5.06426700 | -2.04004900 | -1.32851700 |
| N | 4.95026400  | -4.04967600 | -0.11304400 |

|   |              |             |             |
|---|--------------|-------------|-------------|
| C | 6.29074500   | -3.71127300 | -0.41380600 |
| C | 7.36989800   | -4.32894600 | 0.23767000  |
| C | 6.59318000   | -2.72723400 | -1.36743700 |
| H | 7.20390700   | -5.08593600 | 0.99617200  |
| C | 7.92870000   | -2.42025800 | -1.61544800 |
| H | 5.80424600   | -2.21512900 | -1.90708700 |
| H | 8.17536400   | -1.66069700 | -2.35562100 |
| C | 4.58279900   | -5.37764700 | 0.20531800  |
| C | 3.57486900   | -5.64455500 | 1.14499800  |
| C | 5.19236700   | -6.48044000 | -0.41375000 |
| H | 3.06976700   | -4.83605300 | 1.66186800  |
| C | 4.77678900   | -7.76199300 | -0.06182500 |
| H | 5.96854500   | -6.34275200 | -1.15837400 |
| H | 5.24007000   | -8.62457800 | -0.53834100 |
| N | -6.99949800  | -0.77421800 | 0.02246400  |
| C | -7.98350000  | 0.21106300  | -0.22427300 |
| C | -9.20743400  | 0.21954100  | 0.46332800  |
| C | -7.76436600  | 1.23534100  | -1.15855000 |
| C | -10.12933800 | 1.22393000  | 0.17992300  |
| H | -9.43349700  | -0.53549100 | 1.20812100  |
| H | -6.84134100  | 1.28087700  | -1.72590000 |
| H | -11.08037100 | 1.24255600  | 0.70987900  |
| C | -7.35636600  | -2.11070300 | 0.31811700  |
| C | -8.46357000  | -2.72833600 | -0.28466000 |
| C | -6.60086600  | -2.88025200 | 1.21624300  |
| H | -9.08010400  | -2.19335300 | -0.99852800 |
| C | -6.98324100  | -4.19704300 | 1.45919100  |
| H | -5.73681100  | -2.45911300 | 1.71825100  |
| H | -6.40709800  | -4.80222100 | 2.15745900  |
| C | -8.75720900  | 2.19227700  | -1.35174700 |
| H | -8.59985000  | 2.98877100  | -2.07751700 |
| C | -8.75509000  | -4.05000900 | 0.04281000  |
| H | -9.60942800  | -4.54053800 | -0.42105600 |
| C | 3.23677100   | -6.96905100 | 1.40990800  |
| H | 2.45950700   | -7.18780100 | 2.14057500  |
| C | 8.66538600   | -3.94629300 | -0.10032800 |
| H | 9.51031400   | -4.41640000 | 0.40045800  |
| N | -9.93156100  | 2.20793100  | -0.70760200 |
| N | -8.04122000  | -4.79578800 | 0.89664800  |
| N | 3.81481600   | -8.03003700 | 0.83136800  |
| N | 8.96751900   | -3.00869800 | -1.00826500 |

### **B-1**

|   |             |             |             |
|---|-------------|-------------|-------------|
| C | -2.11627000 | 1.33672100  | 0.10372600  |
| C | -0.80306600 | 0.86420400  | 0.22320900  |
| C | -0.52318600 | -0.51161800 | 0.23662700  |
| C | -1.58708500 | -1.42180600 | 0.12221400  |
| C | -2.91001800 | -0.97925800 | 0.00542900  |
| C | -3.15651700 | 0.40170300  | -0.00066000 |
| H | 0.01063900  | 1.57887600  | 0.30246300  |
| H | -1.38287100 | -2.48750400 | 0.12507300  |
| H | -4.17875600 | 0.75563500  | -0.09135000 |
| C | 0.85061100  | -1.00877500 | 0.37207300  |
| C | 1.26521800  | -2.23238500 | 0.87499500  |
| S | 2.21646900  | -0.04374100 | -0.12647300 |
| C | 2.66161700  | -2.39031100 | 0.86835200  |
| H | 0.57799500  | -2.97456100 | 1.26412400  |

|   |             |             |             |
|---|-------------|-------------|-------------|
| C | 3.35215000  | -1.29355600 | 0.36206300  |
| H | 3.17360200  | -3.27488900 | 1.23361800  |
| C | 4.77493600  | -1.23258500 | 0.26687000  |
| H | 5.27559600  | -2.13266100 | 0.61383300  |
| C | 5.60193900  | -0.23873000 | -0.18269300 |
| C | 5.12059000  | 1.01334900  | -0.67072000 |
| N | 4.70194900  | 2.02674600  | -1.06262600 |
| C | 7.07660500  | -0.39465500 | -0.19018000 |
| O | 7.85709900  | 0.45094900  | -0.57265000 |
| O | 7.48349500  | -1.60379600 | 0.28353900  |
| H | 8.45658100  | -1.58782200 | 0.23039800  |
| C | -2.40047000 | 2.79578300  | 0.08769200  |
| C | -1.68823000 | 3.67848700  | 0.91646500  |
| C | -3.38848000 | 3.32713400  | -0.75794500 |
| C | -1.95474900 | 5.04669600  | 0.90007500  |
| H | -0.93661500 | 3.28673200  | 1.59619500  |
| C | -3.65531300 | 4.69527400  | -0.77410400 |
| H | -3.93162800 | 2.66624800  | -1.42779900 |
| C | -2.93963000 | 5.56088400  | 0.05493800  |
| H | -1.39573700 | 5.71068100  | 1.55388000  |
| H | -4.41714700 | 5.08637300  | -1.44321600 |
| H | -3.14645200 | 6.62746200  | 0.04129500  |
| C | -4.02845900 | -1.95209100 | -0.10944600 |
| C | -3.89497400 | -3.11614600 | -0.88445500 |
| C | -5.24641000 | -1.73055600 | 0.55457700  |
| C | -4.94371900 | -4.02853600 | -0.99129200 |
| H | -2.97159300 | -3.29265800 | -1.42939500 |
| C | -6.29525600 | -2.64282600 | 0.44786900  |
| H | -5.36200800 | -0.84920200 | 1.17938500  |
| C | -6.14838700 | -3.79586800 | -0.32531900 |
| H | -4.82216100 | -4.91802800 | -1.60379000 |
| H | -7.22605200 | -2.45584000 | 0.97677000  |
| H | -6.96597300 | -4.50663100 | -0.40878200 |

## **B-2**

|   |             |             |             |
|---|-------------|-------------|-------------|
| C | 0.19068600  | -0.69348000 | 0.25590900  |
| C | -0.93415000 | -1.52777100 | 0.14935600  |
| C | -2.22075000 | -0.99383000 | 0.00328100  |
| C | -2.36325400 | 0.40179200  | -0.04279000 |
| C | -1.26087900 | 1.26368300  | 0.06446500  |
| C | 0.01271500  | 0.69851500  | 0.21617100  |
| H | -0.80553200 | -2.60494000 | 0.17818800  |
| H | -3.34760400 | 0.82463000  | -0.21850700 |
| H | 0.86917000  | 1.35194200  | 0.35204000  |
| C | 1.52226900  | -1.28416800 | 0.42845500  |
| C | 1.84466100  | -2.51347500 | 0.98287700  |
| S | 2.95643600  | -0.44132100 | -0.09770300 |
| C | 3.22595300  | -2.77132300 | 0.99406100  |
| H | 1.10274100  | -3.18719700 | 1.39542300  |
| C | 3.99690100  | -1.74850500 | 0.44945700  |
| H | 3.67108700  | -3.67467300 | 1.39896400  |
| C | 5.42023100  | -1.79376800 | 0.36244300  |
| H | 5.85386600  | -2.71034700 | 0.75367000  |
| C | 6.31848300  | -0.88349700 | -0.12697100 |
| C | 5.92977800  | 0.37443800  | -0.67837000 |
| N | 5.58587400  | 1.39423500  | -1.12296100 |
| C | 7.77769700  | -1.14443700 | -0.11643000 |



|   |             |             |             |
|---|-------------|-------------|-------------|
| O | 8.61879700  | -0.37693700 | -0.53403800 |
| O | 8.09559100  | -2.35505500 | 0.41845400  |
| H | 9.06748200  | -2.41054600 | 0.37091700  |
| C | -1.43593000 | 2.73646800  | 0.01490900  |
| C | -0.48864200 | 3.56308900  | -0.62013800 |
| C | -2.54766700 | 3.35734600  | 0.59936900  |
| C | -0.64768600 | 4.93994000  | -0.66759800 |
| H | 0.37388600  | 3.11629200  | -1.10647700 |
| C | -2.72297500 | 4.74158300  | 0.56075400  |
| H | -3.28455600 | 2.75359000  | 1.12204000  |
| C | -1.76832500 | 5.54277400  | -0.07647300 |
| H | 0.07971500  | 5.57249400  | -1.16650100 |
| H | -3.59322200 | 5.17951000  | 1.03616400  |
| C | -3.40191700 | -1.88445900 | -0.12247700 |
| C | -3.33521200 | -3.09105600 | -0.84535900 |
| C | -4.62543800 | -1.55669100 | 0.47619400  |
| C | -4.43657400 | -3.92628000 | -0.96171700 |
| H | -2.41137400 | -3.36390800 | -1.34786800 |
| C | -5.74347500 | -2.38572300 | 0.36924100  |
| H | -4.70609600 | -0.64551200 | 1.06262000  |
| C | -5.65295000 | -3.58068600 | -0.35389100 |
| H | -4.38494300 | -4.84974400 | -1.53000500 |
| H | -6.66676900 | -2.09648500 | 0.85808400  |
| O | -1.83363100 | 6.90095200  | -0.17667900 |
| C | -2.94793000 | 7.56538400  | 0.39766400  |
| H | -3.89174300 | 7.23989700  | -0.05962600 |
| H | -2.99876800 | 7.40455000  | 1.48271100  |
| H | -2.79808900 | 8.62784600  | 0.19781900  |
| O | -6.67517400 | -4.46671100 | -0.52594600 |
| C | -7.93396100 | -4.16226300 | 0.05419200  |
| H | -8.59403200 | -4.98950800 | -0.21259100 |
| H | -7.86772300 | -4.08992000 | 1.14786500  |
| H | -8.34621000 | -3.22605100 | -0.34477300 |

### **B-3**

|   |             |             |             |
|---|-------------|-------------|-------------|
| C | 0.16911400  | 2.19706500  | 0.28951900  |
| C | 1.02706400  | 1.08763600  | 0.35114700  |
| C | 0.53191200  | -0.21998300 | 0.25440000  |
| C | -0.85185000 | -0.39761200 | 0.10169400  |
| C | -1.73829700 | 0.68958600  | 0.04822400  |
| C | -1.21106500 | 1.98406900  | 0.13923000  |
| H | 2.08814900  | 1.23994300  | 0.52370100  |
| H | -1.24300300 | -1.40167700 | -0.03026800 |
| H | -1.88172600 | 2.83586300  | 0.09131100  |
| C | 0.68841300  | 3.56415400  | 0.40183900  |
| C | 0.02627200  | 4.69492400  | 0.85563300  |
| S | 2.32332400  | 3.94691700  | -0.07239000 |
| C | 0.82404700  | 5.85133300  | 0.83224200  |
| H | -0.99337600 | 4.67392400  | 1.22221300  |
| C | 2.11630400  | 5.63809000  | 0.36090200  |
| H | 0.48521200  | 6.82863300  | 1.16123500  |
| C | 3.09855400  | 6.66707300  | 0.25637700  |
| H | 2.74309700  | 7.64528400  | 0.56941000  |
| C | 4.40005100  | 6.62551200  | -0.16800300 |
| C | 5.03591900  | 5.42763800  | -0.61332800 |
| N | 5.53157500  | 4.43674900  | -0.97173700 |
| C | 5.25153100  | 7.83844100  | -0.19250200 |

|   |              |             |             |
|---|--------------|-------------|-------------|
| O | 6.40872200   | 7.86205200  | -0.55517700 |
| O | 4.59983200   | 8.95235700  | 0.24036900  |
| H | 5.25307400   | 9.67305700  | 0.17910800  |
| C | 1.44967000   | -1.38469400 | 0.30789400  |
| C | 2.72427500   | -1.33437500 | -0.27293200 |
| C | 1.07341100   | -2.58266300 | 0.94502100  |
| C | 3.59737500   | -2.42196700 | -0.22780000 |
| H | 3.04001700   | -0.43651000 | -0.79689900 |
| C | 1.92914700   | -3.67286000 | 0.99877000  |
| H | 0.10328800   | -2.65006000 | 1.42965700  |
| C | 3.20227500   | -3.60323900 | 0.41202200  |
| H | 4.56973600   | -2.33983900 | -0.69927900 |
| H | 1.63998100   | -4.59074800 | 1.50112900  |
| O | 3.96746200   | -4.72496800 | 0.51873900  |
| C | 5.28176600   | -4.71976300 | -0.04022300 |
| C | 5.90904800   | -6.07915300 | 0.23623600  |
| C | 7.33303800   | -6.19478200 | -0.32269500 |
| C | 7.97656700   | -7.56044100 | -0.04963400 |
| C | 9.40107200   | -7.68691100 | -0.60458800 |
| C | 10.03667100  | -9.05311100 | -0.32774100 |
| H | 5.22682500   | -4.52814300 | -1.12195600 |
| H | 5.87747200   | -3.91471800 | 0.41440000  |
| H | 5.91430500   | -6.24837000 | 1.32073100  |
| H | 5.26801200   | -6.85602600 | -0.20009900 |
| H | 7.31831000   | -6.01217100 | -1.40734000 |
| H | 7.96349700   | -5.40456600 | 0.11091700  |
| H | 7.99174300   | -7.74404100 | 1.03485400  |
| H | 7.34664700   | -8.35156000 | -0.48257200 |
| H | 9.38509900   | -7.50310900 | -1.68831000 |
| H | 10.02981300  | -6.89588600 | -0.17169500 |
| H | 10.09873600  | -9.25055400 | 0.74954300  |
| H | 9.44909900   | -9.86251200 | -0.77834400 |
| H | 11.05202600  | -9.11193500 | -0.73586900 |
| C | -3.19724600  | 0.47457800  | -0.12255400 |
| C | -3.85359200  | -0.58868700 | 0.51141900  |
| C | -3.97507900  | 1.33134200  | -0.92481100 |
| C | -5.22502400  | -0.80186800 | 0.36325800  |
| H | -3.28958400  | -1.25510500 | 1.15830900  |
| C | -5.33893900  | 1.13363300  | -1.08297300 |
| H | -3.49609100  | 2.14935900  | -1.45584700 |
| C | -5.97890000  | 0.06338000  | -0.43904400 |
| H | -5.69180600  | -1.63156200 | 0.88140800  |
| H | -5.93288100  | 1.78922100  | -1.71220500 |
| C | -8.03230900  | -1.12132200 | -0.04659600 |
| H | -7.93547800  | -1.06083900 | 1.04755100  |
| H | -7.60561200  | -2.08243400 | -0.36946400 |
| C | -9.49169300  | -1.00991300 | -0.46585800 |
| H | -9.54470700  | -1.03956000 | -1.56175100 |
| C | -10.36208100 | -2.12111800 | 0.13502300  |
| H | -10.29141100 | -2.09052900 | 1.23240200  |
| H | -9.87020100  | -0.02632400 | -0.15922100 |
| H | -9.96731400  | -3.10194200 | -0.16870400 |
| C | -11.83613400 | -2.02072100 | -0.27837000 |
| H | -11.90825800 | -2.05113100 | -1.37556000 |
| H | -12.23210300 | -1.04026500 | 0.02477800  |
| O | -7.31942300  | -0.04535200 | -0.65679900 |

|   |              |             |             |
|---|--------------|-------------|-------------|
| C | -12.71455500 | -3.12798600 | 0.31782800  |
| H | -12.31813600 | -4.10740000 | 0.01430100  |
| H | -12.64129000 | -3.09721500 | 1.41430200  |
| C | -14.18497800 | -3.02101400 | -0.09878200 |
| H | -14.29394900 | -3.08361400 | -1.18851800 |
| H | -14.78508200 | -3.82487300 | 0.34237900  |
| H | -14.61962100 | -2.06631800 | 0.22211500  |

**B-4**

|   |             |             |             |
|---|-------------|-------------|-------------|
| C | 0.09182300  | -0.71885400 | 0.29399100  |
| C | 0.09479500  | 0.68448700  | 0.30328800  |
| C | -1.09690000 | 1.41386000  | 0.16551300  |
| C | -2.30435600 | 0.71119600  | 0.04218400  |
| C | -2.33801800 | -0.69077700 | 0.04297100  |
| C | -1.12993900 | -1.39701700 | 0.15882200  |
| H | 1.02792400  | 1.21179800  | 0.47766700  |
| H | -3.23282100 | 1.26341900  | -0.05740100 |
| H | -1.13062700 | -2.47941500 | 0.07652300  |
| C | 1.34192200  | -1.47651800 | 0.41688400  |
| C | 1.52278700  | -2.75680300 | 0.91493200  |
| S | 2.85748300  | -0.79054600 | -0.10696800 |
| C | 2.86398300  | -3.17842300 | 0.88654800  |
| H | 0.71249700  | -3.35473500 | 1.31560000  |
| C | 3.74233700  | -2.23286000 | 0.36698200  |
| H | 3.20380800  | -4.14465300 | 1.24548700  |
| C | 5.15022900  | -2.43917600 | 0.24691000  |
| H | 5.48177400  | -3.41664600 | 0.58713900  |
| C | 6.13685100  | -1.61434700 | -0.22101700 |
| C | 5.88212600  | -0.29516900 | -0.70369700 |
| N | 5.64166200  | 0.77668000  | -1.08993200 |
| C | 7.55846100  | -2.03707000 | -0.25702700 |
| O | 8.47086600  | -1.34693000 | -0.65836100 |
| O | 7.74614800  | -3.29949400 | 0.21295900  |
| H | 8.70430300  | -3.46366900 | 0.14139300  |
| C | -1.09212500 | 2.87726400  | 0.17339200  |
| C | -2.08683100 | 3.76645500  | 0.52633600  |
| C | -0.22621100 | 4.95364300  | -0.08984600 |
| C | -1.56551500 | 5.09048600  | 0.37214200  |
| N | 0.04323500  | 3.60301100  | -0.17458700 |
| H | 0.85021500  | 3.20871100  | -0.63459900 |
| H | -3.06465000 | 3.49887400  | 0.90299300  |
| C | 0.58495500  | 6.05809500  | -0.37042100 |
| C | -2.08550700 | 6.38239400  | 0.57514900  |
| C | -1.28246900 | 7.48055800  | 0.30201300  |
| C | 0.03832500  | 7.31983100  | -0.16928000 |
| H | -3.10227200 | 6.51516100  | 0.93565500  |
| H | -1.67344900 | 8.48327100  | 0.45103400  |
| H | 0.64121500  | 8.19974100  | -0.37579000 |
| H | 1.60391400  | 5.93585700  | -0.72786400 |
| C | -3.61370100 | -1.39440600 | -0.10498400 |
| C | -4.78038700 | -0.99925400 | -0.72521500 |
| C | -5.08014600 | -3.10715900 | 0.12445100  |
| C | -5.72727800 | -2.06623500 | -0.59866900 |
| N | -3.79042900 | -2.68669900 | 0.38287000  |
| H | -3.16741600 | -3.12718700 | 1.04271700  |
| C | -5.72625500 | -4.30307300 | 0.45282200  |
| C | -7.05639400 | -2.25656000 | -1.01922400 |

|   |             |             |             |
|---|-------------|-------------|-------------|
| H | -5.21974900 | -5.08576100 | 1.01166400  |
| H | -7.57107900 | -1.48171200 | -1.58133700 |
| C | -7.69974400 | -3.44405500 | -0.69917500 |
| C | -7.04259200 | -4.45563400 | 0.03287700  |
| H | -7.57413000 | -5.37303200 | 0.27005200  |
| H | -8.72748500 | -3.60091500 | -1.01470900 |
| H | -4.92445800 | -0.06918100 | -1.25788100 |

**B-5**

|   |             |             |             |
|---|-------------|-------------|-------------|
| C | -0.36159000 | 0.63030700  | -0.29560300 |
| C | -0.06973900 | -0.73168200 | -0.46996600 |
| C | 1.27347100  | -1.14016900 | -0.51115600 |
| C | 2.31578600  | -0.21491100 | -0.37844900 |
| C | 1.99067500  | 1.14058700  | -0.21047600 |
| C | 0.65899400  | 1.57957300  | -0.15226400 |
| H | -1.39233800 | 0.96992800  | -0.32306200 |
| H | 1.51396800  | -2.18913400 | -0.65012800 |
| H | 2.79125600  | 1.86030200  | -0.06917100 |
| C | -1.13921700 | -1.72185400 | -0.63467300 |
| C | -1.08166600 | -2.93904200 | -1.29634700 |
| S | -2.72172600 | -1.45813900 | 0.05076800  |
| C | -2.29550100 | -3.64605900 | -1.26255300 |
| H | -0.19576000 | -3.28703900 | -1.81460600 |
| C | -3.31282500 | -2.99115900 | -0.57434800 |
| H | -2.44908900 | -4.61059600 | -1.73608900 |
| C | -4.62811900 | -3.52092900 | -0.41801400 |
| H | -4.76596300 | -4.49453000 | -0.88097000 |
| C | -5.73186300 | -3.01079400 | 0.21194100  |
| C | -5.73578600 | -1.74582400 | 0.87330400  |
| N | -5.71257500 | -0.71066000 | 1.40608300  |
| C | -7.01791100 | -3.74691000 | 0.25032200  |
| O | -8.02685700 | -3.34533700 | 0.79051300  |
| O | -6.96184800 | -4.94541600 | -0.39248200 |
| H | -7.85305600 | -5.32907300 | -0.30046900 |
| C | 0.32949300  | 3.01178300  | 0.06289400  |
| C | -0.69644000 | 3.39716600  | 0.85218200  |
| C | 1.14669000  | 4.05408900  | -0.58214200 |
| C | -0.97254500 | 4.85384000  | 1.13714500  |
| H | -1.28783600 | 2.65462100  | 1.38493400  |
| C | 0.74514400  | 5.33353500  | -0.62977000 |
| H | 2.07404000  | 3.75694800  | -1.06553100 |
| C | -0.59611200 | 5.74898800  | -0.06306800 |
| H | 1.33894900  | 6.07911400  | -1.15509700 |
| C | 3.73314100  | -0.66297900 | -0.38919800 |
| C | 4.12564200  | -1.79428200 | 0.23055000  |
| C | 4.74428600  | 0.16883800  | -1.06964000 |
| C | 5.55576100  | -2.26891000 | 0.30003800  |
| H | 3.40056300  | -2.37585800 | 0.79791600  |
| C | 6.01602000  | -0.22642800 | -1.20583300 |
| H | 4.42244300  | 1.11529100  | -1.49599700 |
| C | 6.52910300  | -1.55434900 | -0.70936700 |
| C | -2.41725100 | 5.13192500  | 1.60113800  |
| H | -2.44819500 | 6.12724500  | 2.06657500  |
| H | -1.32604100 | 6.16844200  | -1.93106000 |
| C | -3.41503300 | 5.09656600  | 0.43594900  |
| C | -2.94949000 | 6.03463400  | -0.68004100 |
| H | -0.29602600 | 5.14093600  | 1.96256100  |

|   |             |             |             |
|---|-------------|-------------|-------------|
| H | -0.53217200 | 6.78927000  | 0.31363500  |
| H | -2.70133700 | 4.41374400  | 2.38106600  |
| H | -3.48735800 | 4.07926500  | 0.03173000  |
| H | -4.41472400 | 5.38604400  | 0.78206200  |
| H | -2.97606000 | 7.08006200  | -0.30811300 |
| H | -3.62763600 | 5.97761400  | -1.53923000 |
| N | -1.61513100 | 5.62478700  | -1.12036800 |
| H | 6.74199400  | 0.39467900  | -1.72655900 |
| H | 6.63592400  | -2.21228600 | -1.58801000 |
| H | 5.55781500  | -3.34240700 | 0.05846300  |
| C | 6.10445200  | -2.14384300 | 1.74170200  |
| H | 5.40589800  | -2.60017200 | 2.45298500  |
| H | 7.90766700  | -0.53381700 | 0.40763100  |
| C | 8.34928000  | -2.51740000 | 0.59100000  |
| C | 7.49765200  | -2.79050200 | 1.86369100  |
| H | 8.31299800  | -3.38499900 | -0.08073600 |
| H | 7.39740600  | -3.87324800 | 2.01645900  |
| H | 6.15325800  | -1.07898800 | 2.00400700  |
| H | 8.00283800  | -2.39777600 | 2.75502100  |
| H | 9.40348700  | -2.37154400 | 0.85125500  |
| N | 7.89675200  | -1.36250200 | -0.18738400 |

### **B-6**

|   |             |             |             |
|---|-------------|-------------|-------------|
| C | 0.54613800  | 1.57059800  | 0.78985000  |
| C | 1.23040100  | 0.35604500  | 0.61425200  |
| C | 0.54642100  | -0.86659300 | 0.59905000  |
| C | -0.84936400 | -0.85082500 | 0.74845000  |
| C | -1.56329300 | 0.34487700  | 0.91942400  |
| C | -0.84855100 | 1.54994100  | 0.94458200  |
| H | 2.31376700  | 0.35837600  | 0.54002200  |
| H | -1.39379300 | -1.78750300 | 0.68163700  |
| H | -1.38899800 | 2.48181100  | 1.07417400  |
| C | 1.26530300  | 2.84848300  | 0.83159800  |
| C | 0.88586100  | 4.01950200  | 1.46980500  |
| S | 2.79005300  | 3.05226600  | 0.00826300  |
| C | 1.81180200  | 5.06395100  | 1.30826400  |
| H | -0.01921300 | 4.10252100  | 2.06010300  |
| C | 2.92288400  | 4.72179200  | 0.54302900  |
| H | 1.69494700  | 6.05105400  | 1.74428800  |
| C | 3.98998400  | 5.62357600  | 0.25436000  |
| H | 3.85406200  | 6.61356700  | 0.68175000  |
| C | 5.14280800  | 5.44931100  | -0.46378600 |
| C | 5.48770300  | 4.21659300  | -1.09540400 |
| N | 5.74558300  | 3.19994100  | -1.60121000 |
| C | 6.12709100  | 6.54416200  | -0.63640400 |
| O | 7.16352700  | 6.44845000  | -1.25898300 |
| O | 5.75210000  | 7.69650800  | -0.01638600 |
| H | 6.46827600  | 8.33189700  | -0.19880400 |
| C | 1.28996900  | -2.14261500 | 0.43538700  |
| C | 2.48517400  | -2.16809200 | -0.42993700 |
| C | 0.91494500  | -3.27712400 | 1.06825000  |
| C | 3.33281800  | -3.20751000 | -0.40924500 |
| H | 2.66557600  | -1.32081800 | -1.08637300 |
| C | 1.63088700  | -4.59420000 | 0.86172000  |
| H | 0.04862600  | -3.26766700 | 1.72523600  |
| C | 3.13855300  | -4.34968200 | 0.56771800  |
| H | 4.23293900  | -3.21832200 | -1.01661900 |

|   |             |             |             |
|---|-------------|-------------|-------------|
| C | -3.04311400 | 0.33109800  | 1.04089100  |
| C | -3.82839300 | 1.30322300  | 0.52795600  |
| C | -3.70244000 | -0.80213300 | 1.72130900  |
| C | -5.33323000 | 1.29178900  | 0.74225800  |
| H | -3.41837400 | 2.14170100  | -0.02883500 |
| C | -5.01750500 | -1.03344700 | 1.57568200  |
| H | -3.09139400 | -1.45816200 | 2.33655900  |
| C | -5.87306800 | -0.15252900 | 0.68674500  |
| H | -5.47846300 | -1.89498000 | 2.05357500  |
| C | -6.82892700 | 1.72806500  | -1.26698400 |
| C | -6.12765700 | 0.45306500  | -1.78742800 |
| C | -6.61135500 | 3.36370400  | 0.60882700  |
| H | -5.83278300 | 3.84917300  | 1.20844400  |
| H | -7.00269100 | 4.11948300  | -0.07774600 |
| H | -7.42983800 | 3.07688600  | 1.29593500  |
| H | -5.49405100 | 1.62177900  | 1.78355700  |
| H | -6.89237000 | -0.13494100 | 1.09057700  |
| C | -6.97649500 | -1.82058400 | -0.90868400 |
| H | -6.78278600 | -2.63212200 | -0.19681500 |
| H | -7.99406300 | -1.45509700 | -0.72858800 |
| H | -6.95308100 | -2.25352300 | -1.91584900 |
| C | 0.95286500  | -5.45743000 | -0.24014400 |
| C | 1.80039200  | -6.71401900 | -0.49467300 |
| C | 3.28443800  | -6.41828100 | -0.83063400 |
| H | 1.56932900  | -5.17313100 | 1.79472400  |
| H | 3.57738100  | -3.98468900 | 1.51017700  |
| C | -0.48747100 | -5.83701800 | 0.12799500  |
| H | -0.93667500 | -6.46103400 | -0.65389800 |
| H | -0.51864000 | -6.40814000 | 1.06556900  |
| H | -1.12203900 | -4.95257000 | 0.25080800  |
| H | 1.35388600  | -7.29991100 | -1.31018800 |
| H | 1.75800700  | -7.35324700 | 0.40017500  |
| C | 3.39799000  | -5.71882800 | -2.20313500 |
| C | 4.04287700  | -7.75283600 | -0.95612700 |
| H | 2.98300700  | -6.36625100 | -2.98467300 |
| H | 2.86455000  | -4.76704800 | -2.24622800 |
| H | 4.44978200  | -5.52526800 | -2.43783900 |
| H | 5.11363600  | -7.58113500 | -1.11411500 |
| H | 3.91819900  | -8.39466000 | -0.07854000 |
| H | 3.65976100  | -8.30517500 | -1.82078900 |
| H | 0.91679200  | -4.85792400 | -1.15945100 |
| N | 3.91262900  | -5.55877500 | 0.22172100  |
| C | 4.35158500  | -6.26750100 | 1.42538200  |
| H | 5.11980700  | -7.00303800 | 1.17835800  |
| H | 4.80994500  | -5.54420100 | 2.10737600  |
| H | 3.55219000  | -6.78940500 | 1.98356100  |
| N | -6.02959400 | 2.25403500  | -0.13146900 |
| C | -5.93343500 | -0.70147600 | -0.77140300 |
| H | -4.95451600 | -1.14672300 | -0.98515900 |
| H | -5.13967800 | 0.76393800  | -2.14873600 |
| H | -6.67892100 | 0.08968900  | -2.66381700 |
| C | -8.31459600 | 1.45895700  | -0.91384300 |
| C | -6.79241700 | 2.76363000  | -2.41302400 |
| H | -8.82736800 | 2.38776600  | -0.64028200 |
| H | -8.84243000 | 1.03854500  | -1.77782400 |
| H | -8.43040800 | 0.76172700  | -0.07958900 |

|   |             |            |             |
|---|-------------|------------|-------------|
| H | -5.75725600 | 3.00561700 | -2.67301800 |
| H | -7.29385900 | 2.36636200 | -3.30356100 |
| H | -7.30243900 | 3.69465500 | -2.14340300 |

**B-7**

|   |             |             |             |
|---|-------------|-------------|-------------|
| C | -0.91918300 | 0.39903300  | -0.07752500 |
| C | -1.09878300 | -0.99039700 | -0.16579200 |
| C | 0.01986700  | -1.82938400 | -0.03632100 |
| C | 1.29959600  | -1.30214100 | 0.17643700  |
| C | 1.44560200  | 0.09074500  | 0.26610700  |
| C | 0.34762400  | 0.95553300  | 0.14312300  |
| H | -1.76789500 | 1.05905800  | -0.22806300 |
| H | -0.10795800 | -2.90500800 | -0.10130000 |
| H | 2.42321200  | 0.50551100  | 0.49260400  |
| C | -2.42473500 | -1.57010900 | -0.40854200 |
| C | -2.73078600 | -2.77739000 | -1.01574400 |
| S | -3.87295600 | -0.73684900 | 0.09259800  |
| C | -4.11296000 | -3.02649800 | -1.08696400 |
| H | -1.97782400 | -3.44164500 | -1.42390000 |
| C | -4.89767500 | -2.01832100 | -0.53654700 |
| H | -4.54686800 | -3.91279000 | -1.53873900 |
| C | -6.32511300 | -2.05511600 | -0.50205900 |
| H | -6.75170100 | -2.95405200 | -0.93916600 |
| C | -7.23067200 | -1.15287500 | -0.01429700 |
| C | -6.84845400 | 0.08195500  | 0.59167200  |
| N | -6.50624900 | 1.08174400  | 1.08064700  |
| C | -8.69270700 | -1.39680600 | -0.08359200 |
| O | -9.53731500 | -0.63213800 | 0.33064600  |
| O | -9.00265900 | -2.58483400 | -0.66846100 |
| H | -9.97614500 | -2.63362700 | -0.65829300 |
| C | 0.51850000  | 2.42776800  | 0.24817700  |
| C | -0.45093700 | 3.21033200  | 0.90843100  |
| C | 1.65056400  | 3.05085500  | -0.30984600 |
| C | -0.33308900 | 4.59581500  | 1.03126600  |
| H | -1.30633200 | 2.71867300  | 1.36033400  |
| C | 1.76917500  | 4.42820000  | -0.18688100 |
| H | 2.39424200  | 2.47151600  | -0.84763800 |
| C | 0.79003900  | 5.19684700  | 0.47450700  |
| H | -1.08957200 | 5.17568800  | 1.55046600  |
| C | 2.47340700  | -2.20146700 | 0.32779500  |
| C | 2.36309500  | -3.40126100 | 1.05959400  |
| C | 3.70562700  | -1.85756900 | -0.25883300 |
| C | 3.43976100  | -4.27447400 | 1.22664200  |
| H | 1.41741500  | -3.64130800 | 1.53501400  |
| C | 4.77667400  | -2.72483500 | -0.09312700 |
| H | 3.80456000  | -0.95164100 | -0.84827700 |
| C | 4.64977700  | -3.92218000 | 0.63992100  |
| H | 3.33359000  | -5.18805700 | 1.80321800  |
| H | 3.57558700  | 5.11945700  | -1.13769900 |
| H | 0.75351900  | 7.32885200  | 0.77446600  |
| C | 2.41796600  | 6.62380800  | -0.27074200 |
| N | 2.73272400  | 5.32894600  | -0.62360200 |
| N | 1.22067500  | 6.51442400  | 0.40360700  |
| S | 3.28807800  | 8.00652900  | -0.58798800 |
| C | 6.80264400  | -3.79398300 | -0.12911400 |
| N | 5.89410200  | -4.53560400 | 0.59576700  |
| N | 6.09090700  | -2.68787600 | -0.54199600 |

|   |            |             |             |
|---|------------|-------------|-------------|
| H | 6.52469200 | -1.96776800 | -1.10058800 |
| H | 6.15679600 | -5.41324300 | 1.01965900  |
| S | 8.39777800 | -4.15354200 | -0.43692300 |

**B-8**

|   |             |             |             |
|---|-------------|-------------|-------------|
| C | -0.57807000 | -0.78299300 | 0.02960000  |
| C | -0.95695900 | 0.55888300  | -0.11315000 |
| C | 0.00042300  | 1.58379400  | -0.17487700 |
| C | 1.36153100  | 1.24750000  | -0.08651600 |
| C | 1.77228600  | -0.08496600 | 0.04956800  |
| C | 0.79011600  | -1.08597500 | 0.10435400  |
| H | -2.01246800 | 0.80684100  | -0.17080000 |
| H | 2.10714800  | 2.03550300  | -0.07247300 |
| H | 1.09875400  | -2.12518100 | 0.15670400  |
| C | -0.39610200 | 2.98928700  | -0.31565600 |
| C | 0.35468500  | 4.03514800  | -0.83029400 |
| S | -1.97262200 | 3.54288900  | 0.18840100  |
| C | -0.32854700 | 5.26294000  | -0.82763100 |
| H | 1.35641900  | 3.90589100  | -1.22295200 |
| C | -1.61956200 | 5.19001900  | -0.31374800 |
| H | 0.09140000  | 6.19160900  | -1.20076400 |
| C | -2.49629900 | 6.31249400  | -0.22226100 |
| H | -2.05567500 | 7.24145300  | -0.57446400 |
| C | -3.78516100 | 6.40974900  | 0.22854100  |
| C | -4.52418700 | 5.29233800  | 0.72124700  |
| N | -5.10599700 | 4.36431200  | 1.11631300  |
| C | -4.51532000 | 7.70039600  | 0.23086700  |
| O | -5.65711400 | 7.84572900  | 0.61260600  |
| O | -3.76780600 | 8.73241100  | -0.24694800 |
| H | -4.34632200 | 9.51519000  | -0.19652400 |
| C | -1.59870400 | -1.85872200 | 0.08226700  |
| C | -2.77466800 | -1.78392900 | -0.69169800 |
| C | -1.42220800 | -2.98284200 | 0.90674600  |
| C | -3.73467000 | -2.78360300 | -0.64619900 |
| H | -2.92127900 | -0.93847100 | -1.35824100 |
| C | -2.37975400 | -3.98928100 | 0.95624400  |
| H | -0.53960100 | -3.05433100 | 1.53580100  |
| C | -3.54748400 | -3.90415900 | 0.18385200  |
| H | -4.63268300 | -2.72210500 | -1.25043700 |
| H | -2.25221700 | -4.85475000 | 1.59926500  |
| C | 3.21313900  | -0.42879300 | 0.13449600  |
| C | 4.17099800  | 0.26626800  | -0.63168800 |
| C | 3.66495700  | -1.45585100 | 0.98023200  |
| C | 5.52029800  | -0.04597200 | -0.55984700 |
| H | 3.84097300  | 1.04454400  | -1.31464300 |
| C | 5.01602400  | -1.77399600 | 1.05796600  |
| H | 2.95305100  | -1.99055500 | 1.60236500  |
| C | 5.96101700  | -1.07588800 | 0.29161000  |
| H | 6.24962600  | 0.48613600  | -1.16027200 |
| H | 5.37076800  | -2.56016800 | 1.71740900  |
| N | -4.44786800 | -4.98214600 | 0.31641900  |
| N | 7.30117600  | -1.48571300 | 0.45260800  |
| N | 8.13733000  | -0.84154700 | -0.25812300 |
| C | 9.44500000  | -1.23003800 | -0.11039400 |
| C | 10.12531200 | -2.18593500 | 0.64929700  |
| C | 11.49310300 | -2.07352300 | 0.33427300  |
| H | 9.65507100  | -2.86875600 | 1.34112300  |



|   |             |             |             |
|---|-------------|-------------|-------------|
| C | 11.62872100 | -1.05741000 | -0.60728000 |
| H | 10.15444700 | 0.18646200  | -1.50511500 |
| H | 12.30352200 | -2.66263600 | 0.74163100  |
| H | 12.50758600 | -0.66613000 | -1.09897800 |
| N | 10.38991300 | -0.55854600 | -0.86572600 |
| C | -6.43401500 | -7.11554600 | 0.44521600  |
| C | -7.64978400 | -7.74810900 | 0.12208700  |
| H | -5.65746400 | -7.46448500 | 1.10945900  |
| C | -8.32963100 | -6.92688000 | -0.77294700 |
| H | -7.78078100 | -5.04227200 | -1.59400300 |
| H | -8.00532200 | -8.69957700 | 0.49371800  |
| H | -9.28905200 | -7.05195900 | -1.25370700 |
| C | -6.39231900 | -5.91127300 | -0.26317800 |
| N | -7.56215000 | -5.82660600 | -0.99692500 |
| N | -5.50662600 | -4.87009500 | -0.38033500 |

**B-9**

|   |             |             |             |
|---|-------------|-------------|-------------|
| C | -1.08114900 | 1.21405200  | -0.22039200 |
| C | -0.05254100 | 2.16766600  | -0.16516600 |
| C | 1.28027300  | 1.72906200  | -0.09736400 |
| C | 1.59422600  | 0.36397100  | -0.09704500 |
| C | 0.54376900  | -0.56417600 | -0.16173400 |
| C | -0.79851900 | -0.15878700 | -0.21819100 |
| H | -2.11539800 | 1.54238900  | -0.26278700 |
| H | 2.07747300  | 2.45771700  | 0.00779100  |
| H | 0.77788200  | -1.62264700 | -0.21912800 |
| C | -0.34561700 | 3.60530700  | -0.16017100 |
| C | 0.46679100  | 4.63659000  | -0.60538600 |
| S | -1.85599000 | 4.22214200  | 0.45857300  |
| C | -0.11959200 | 5.90551400  | -0.46200100 |
| H | 1.44125700  | 4.46984400  | -1.04940500 |
| C | -1.39358900 | 5.87938300  | 0.09727200  |
| H | 0.35728800  | 6.83202100  | -0.76565000 |
| C | -2.17522400 | 7.05031600  | 0.33104200  |
| H | -1.68087800 | 7.97206000  | 0.03575000  |
| C | -3.42875600 | 7.20193100  | 0.85993600  |
| C | -4.22544900 | 6.10341200  | 1.30268500  |
| C | -4.05471700 | 8.53742400  | 1.01141500  |
| O | -5.15950700 | 8.73316600  | 1.47172500  |
| O | -3.25574600 | 9.54946100  | 0.57552000  |
| H | -3.76837600 | 10.36492800 | 0.72431600  |
| N | -4.85548700 | 5.19063700  | 1.65724300  |
| C | -1.89021500 | -1.15960700 | -0.29456700 |
| C | -3.03622700 | -0.93176200 | -1.07320800 |
| C | -1.82486400 | -2.37195400 | 0.40138100  |
| C | -4.05590000 | -1.87365800 | -1.16871000 |
| H | -3.11636600 | -0.02348700 | -1.66361900 |
| C | -2.86298600 | -3.29910100 | 0.34884700  |
| H | -0.96964200 | -2.58510500 | 1.03609800  |
| C | -4.01203000 | -3.07787200 | -0.43172500 |
| H | -2.76786000 | -4.20093300 | 0.93841700  |
| C | 3.00619200  | -0.08916400 | -0.03107300 |
| C | 4.02105100  | 0.60288900  | -0.71176200 |
| C | 3.37723800  | -1.22215000 | 0.70705200  |
| C | 5.35197100  | 0.20350800  | -0.62582300 |
| H | 3.77106100  | 1.46062000  | -1.32912000 |
| C | 4.70176000  | -1.64901500 | 0.76604700  |

|   |              |             |             |
|---|--------------|-------------|-------------|
| H | 2.62217800   | -1.77540300 | 1.25783800  |
| C | 5.72025300   | -0.93703100 | 0.11417500  |
| H | 4.94244900   | -2.53898600 | 1.33699400  |
| C | 7.69595800   | -0.17678900 | -1.89469800 |
| C | 7.82835900   | -1.28546000 | -1.03580700 |
| S | 6.63281000   | 1.16896500  | -1.40424700 |
| N | 7.07792600   | -1.32696600 | 0.16663500  |
| C | 8.41956100   | -0.10415600 | -3.08496300 |
| C | 8.69635500   | -2.31985500 | -1.41860600 |
| C | 9.31550900   | -1.11757300 | -3.42819600 |
| C | 9.44710800   | -2.22416500 | -2.59132700 |
| H | 8.28606500   | 0.75698900  | -3.73361700 |
| H | 9.89221900   | -1.04571400 | -4.34550600 |
| H | 10.12270400  | -3.03298500 | -2.85562000 |
| H | 8.78263900   | -3.21068800 | -0.80591800 |
| C | 7.54573100   | -2.15712100 | 1.28039200  |
| C | 7.40335300   | -1.46653900 | 2.64428300  |
| C | 7.93334400   | -2.33899700 | 3.78995600  |
| C | 7.81730400   | -1.65861500 | 5.15778300  |
| H | 7.05092500   | -3.14198600 | 1.29238100  |
| H | 8.60711800   | -2.34655400 | 1.10800600  |
| H | 7.95365100   | -0.51761700 | 2.60798600  |
| H | 6.35519800   | -1.20947000 | 2.83611600  |
| H | 7.38496800   | -3.29187800 | 3.80855600  |
| H | 8.98477200   | -2.59685800 | 3.59833600  |
| H | 8.20164800   | -2.30268300 | 5.95653900  |
| H | 8.38493800   | -0.72071800 | 5.18251300  |
| H | 6.77338700   | -1.41971900 | 5.39426300  |
| C | -6.66223500  | -2.48789200 | -1.57551700 |
| C | -6.39114300  | -3.63084000 | -0.79383500 |
| C | -7.97313500  | -2.08947200 | -1.83637700 |
| C | -7.49350300  | -4.37473000 | -0.33752900 |
| H | -8.13978100  | -1.19017600 | -2.42282800 |
| H | -7.34303500  | -5.26276800 | 0.26155300  |
| C | -9.05351900  | -2.84501200 | -1.38058800 |
| C | -8.80245700  | -3.99561800 | -0.64007400 |
| H | -10.06983600 | -2.53559900 | -1.60452600 |
| H | -9.62431000  | -4.60491100 | -0.27447200 |
| S | -5.33855100  | -1.60497300 | -2.36992000 |
| N | -5.06016900  | -4.01860200 | -0.50084900 |
| C | -4.81712800  | -5.37941300 | -0.00870000 |
| C | -4.98562700  | -5.61969400 | 1.50554600  |
| C | -4.70475000  | -7.08137700 | 1.88014600  |
| C | -4.86185000  | -7.35644100 | 3.37909900  |
| H | -5.48811700  | -6.04581800 | -0.56125100 |
| H | -3.80098900  | -5.65517800 | -0.31134200 |
| H | -4.31643300  | -4.96029000 | 2.07030800  |
| H | -5.99924300  | -5.34710600 | 1.82109200  |
| H | -5.38041600  | -7.73915600 | 1.31469100  |
| H | -3.68660900  | -7.35008900 | 1.56342500  |
| H | -4.65529300  | -8.40637900 | 3.61458700  |
| H | -4.17347500  | -6.74000100 | 3.96979000  |
| H | -5.88022300  | -7.13224900 | 3.71865600  |

**B-10**

|   |             |            |             |
|---|-------------|------------|-------------|
| C | -0.36396400 | 2.91050300 | 0.11028700  |
| C | -1.26105500 | 1.84381900 | -0.05786900 |

|   |             |             |             |
|---|-------------|-------------|-------------|
| C | -0.80316600 | 0.53051600  | -0.23005700 |
| C | 0.58088100  | 0.30054900  | -0.22959800 |
| C | 1.50393800  | 1.34502100  | -0.06799800 |
| C | 1.01564400  | 2.64705000  | 0.09933400  |
| H | -2.32961200 | 2.03641800  | -0.05923600 |
| H | 0.94792900  | -0.71258700 | -0.36007100 |
| H | 1.71723100  | 3.46525600  | 0.22402800  |
| C | -0.84153400 | 4.28479000  | 0.30107400  |
| C | -0.19487600 | 5.32600800  | 0.94902100  |
| S | -2.38982600 | 4.79996100  | -0.31735900 |
| C | -0.93619000 | 6.51979100  | 0.95695100  |
| H | 0.77039600  | 5.21397100  | 1.42884600  |
| C | -2.16815300 | 6.42455300  | 0.31703200  |
| H | -0.60056400 | 7.43903000  | 1.42643400  |
| C | -3.08692600 | 7.51127900  | 0.20969200  |
| H | -2.73088800 | 8.43167200  | 0.66499700  |
| C | -4.32756900 | 7.58396900  | -0.36442800 |
| C | -4.95537500 | 6.47359200  | -1.00509000 |
| N | -5.44600800 | 5.55216600  | -1.52092500 |
| C | -5.11783100 | 8.83854500  | -0.35752300 |
| O | -6.22073300 | 8.96142200  | -0.84655600 |
| O | -4.47591100 | 9.86538900  | 0.26371100  |
| H | -5.08539000 | 10.62371100 | 0.20515500  |
| C | -4.50457500 | -3.87127100 | -0.99879800 |
| C | -5.46807800 | -4.42570100 | -0.21854400 |
| C | -6.35278900 | -5.47986400 | -0.78747900 |
| C | -6.77706700 | -5.43025300 | -2.12828000 |
| C | -6.78323700 | -6.56299100 | 0.00101900  |
| C | -7.57740200 | -6.43637900 | -2.66645200 |
| H | -6.49747100 | -4.57945400 | -2.74279900 |
| C | -7.58144900 | -7.57001600 | -0.53807700 |
| H | -6.47589800 | -6.61911300 | 1.04080800  |
| C | -7.98101400 | -7.51336200 | -1.87491300 |
| H | -7.89854700 | -6.37058400 | -3.70279700 |
| H | -7.89137800 | -8.40244600 | 0.08840900  |
| H | -8.60954400 | -8.29518400 | -2.29277900 |
| H | -4.36614000 | -4.32244100 | -1.98039800 |
| C | -5.67090500 | -4.08104400 | 1.22012800  |
| C | -6.93084200 | -3.67317900 | 1.68930800  |
| C | -4.61835200 | -4.19585200 | 2.14287000  |
| C | -7.12426600 | -3.36044900 | 3.03471100  |
| H | -7.75893700 | -3.59539200 | 0.99017800  |
| C | -4.81454300 | -3.89414600 | 3.49018000  |
| H | -3.64381500 | -4.52548400 | 1.79490200  |
| C | -6.06664600 | -3.47016700 | 3.94007000  |
| H | -8.10315000 | -3.03445200 | 3.37641300  |
| H | -3.98861000 | -3.99316500 | 4.18974600  |
| H | -6.21894300 | -3.23280300 | 4.98957400  |
| C | -1.75878200 | -0.59110900 | -0.40867600 |
| C | -2.98015100 | -0.62646100 | 0.28691600  |
| C | -1.47925200 | -1.65016600 | -1.28789500 |
| C | -3.87606100 | -1.67666400 | 0.12720000  |
| H | -3.22571100 | 0.17381200  | 0.97953600  |
| C | -2.37954300 | -2.69594900 | -1.45530700 |
| H | -0.56324000 | -1.63697600 | -1.87201600 |
| C | -3.59199100 | -2.74899000 | -0.74077700 |

|   |             |             |             |
|---|-------------|-------------|-------------|
| H | -4.81102300 | -1.66103700 | 0.67501800  |
| H | -2.14523000 | -3.49289600 | -2.15736200 |
| C | 2.96376800  | 1.07598500  | -0.07429600 |
| C | 3.86761300  | 1.97119500  | -0.66934600 |
| C | 3.49249200  | -0.08077300 | 0.52572000  |
| C | 5.23400600  | 1.71467900  | -0.66733900 |
| H | 3.49425900  | 2.86598200  | -1.15989000 |
| C | 4.85735900  | -0.34177000 | 0.52085100  |
| H | 2.82512300  | -0.77071400 | 1.03481700  |
| C | 5.76547000  | 0.54533500  | -0.08986700 |
| H | 5.90978900  | 2.42505300  | -1.13812300 |
| H | 5.22705400  | -1.23144200 | 1.01750100  |
| C | 7.22334900  | 0.36274400  | -0.09953200 |
| H | 7.77521900  | 1.29880800  | -0.17369200 |
| C | 7.97311400  | -0.76811900 | -0.03905300 |
| C | 7.40533800  | -2.14572400 | -0.13699200 |
| C | 6.61582800  | -2.52181400 | -1.23601300 |
| C | 7.68358300  | -3.10828100 | 0.84791400  |
| C | 6.10471200  | -3.81530700 | -1.33789900 |
| H | 6.40770800  | -1.79134000 | -2.01221200 |
| C | 7.16289800  | -4.39865300 | 0.75187300  |
| H | 8.30749000  | -2.83706500 | 1.69517400  |
| C | 6.37167400  | -4.75679200 | -0.34174900 |
| H | 5.50009500  | -4.08882900 | -2.19867400 |
| H | 7.37959800  | -5.12619600 | 1.52970800  |
| H | 5.97194700  | -5.76426300 | -0.42039800 |
| C | 9.45382000  | -0.65860200 | 0.07565000  |
| C | 10.29767700 | -1.57585500 | -0.57763300 |
| C | 10.05288800 | 0.36697400  | 0.83030200  |
| C | 11.68383400 | -1.45445100 | -0.50240300 |
| H | 9.85928200  | -2.38055500 | -1.15984800 |
| C | 11.43931600 | 0.48667300  | 0.90732200  |
| H | 9.42223600  | 1.05828100  | 1.38177400  |
| C | 12.26207600 | -0.42166700 | 0.23852500  |
| H | 12.31430100 | -2.16854600 | -1.02583600 |
| H | 11.87755700 | 1.28314000  | 1.50321600  |
| H | 13.34312800 | -0.33171100 | 0.30248800  |

### **Cb-1**

|   |             |             |             |
|---|-------------|-------------|-------------|
| C | -0.40634900 | -0.74335600 | -0.24669400 |
| C | -0.34790200 | 0.65304400  | -0.13930600 |
| C | 0.88830600  | 1.30247600  | 0.02812100  |
| C | 2.05398700  | 0.51970000  | 0.12581000  |
| C | 2.00343900  | -0.88128800 | 0.04166000  |
| C | 0.76631000  | -1.50967800 | -0.16877200 |
| H | -1.26042300 | 1.23283300  | -0.17564200 |
| H | 3.01040200  | 1.00439200  | 0.26689400  |
| H | 0.72023100  | -2.58521700 | -0.27464800 |
| C | -1.69209100 | -1.42480700 | -0.44786300 |
| C | -1.91625800 | -2.65224900 | -1.05272900 |
| S | -3.19042900 | -0.71632300 | 0.09822700  |
| C | -3.27310400 | -3.01507800 | -1.08639600 |
| H | -1.12256200 | -3.25146900 | -1.48320300 |
| C | -4.12386300 | -2.07728300 | -0.50875300 |
| H | -3.64443200 | -3.93369300 | -1.52960200 |
| C | -5.53935100 | -2.23826300 | -0.43592600 |
| H | -5.89579900 | -3.16996300 | -0.86735800 |

|   |             |             |             |
|---|-------------|-------------|-------------|
| C | -6.51140200 | -1.42361700 | 0.08059900  |
| C | -6.23040600 | -0.16150900 | 0.68511600  |
| N | -5.97689500 | 0.86475400  | 1.17339200  |
| C | -7.94427400 | -1.80109800 | 0.04505500  |
| O | -8.84840100 | -1.12164600 | 0.48330400  |
| O | -8.15946300 | -3.01152200 | -0.53981900 |
| H | -9.12397900 | -3.14667100 | -0.50379600 |
| C | -0.64361100 | 5.91109400  | 0.39209400  |
| C | -1.87204100 | 4.67227200  | -1.28156400 |
| C | 0.20232400  | 4.82338800  | 0.55933800  |
| H | -0.48752100 | 6.81938100  | 0.96981400  |
| C | -1.02695700 | 3.56868400  | -1.12438500 |
| H | -2.67603700 | 4.61781400  | -2.01052900 |
| C | -0.00170300 | 3.64344800  | -0.17551900 |
| H | -1.15983700 | 2.69009000  | -1.74478400 |
| C | 2.87772800  | -4.88162600 | 1.96666900  |
| C | 5.08872600  | -4.55714400 | 1.04832800  |
| C | 2.44864900  | -3.65483700 | 1.44719300  |
| H | 2.17655700  | -5.47734900 | 2.54555400  |
| C | 4.67926500  | -3.33893500 | 0.52705300  |
| H | 6.11284200  | -4.89480500 | 0.90562900  |
| C | 3.35751500  | -2.88833900 | 0.70894700  |
| H | 1.44305100  | -3.30380600 | 1.64530400  |
| N | 3.18769600  | -1.62575900 | 0.12040400  |
| C | 5.45560900  | -2.31708600 | -0.26380800 |
| C | 4.48908100  | -1.08929500 | -0.33495600 |
| C | 4.50241400  | -0.60470800 | -1.81015300 |
| C | 5.76397000  | -2.66780300 | -1.74148100 |
| C | 5.71990700  | -1.30432600 | -2.44744500 |
| C | 1.42078200  | 4.68433600  | 1.44820500  |
| C | 2.03328300  | 3.32023600  | 0.97780400  |
| C | 2.52094700  | 5.73861800  | 1.19249200  |
| C | 3.33821300  | 3.69029500  | 0.20912700  |
| H | 4.20363900  | 3.46261600  | 0.84564500  |
| C | 3.26213800  | 5.20796400  | -0.04383000 |
| N | 0.98426900  | 2.69184100  | 0.14405200  |
| H | 2.24977200  | 2.64870500  | 1.81355200  |
| H | 1.12945900  | 4.66030800  | 2.50572200  |
| H | 3.44441900  | 3.10974300  | -0.71209600 |
| H | 4.24800100  | 5.66434400  | -0.18173500 |
| H | 2.67449600  | 5.41291900  | -0.94657800 |
| H | 3.20209200  | 5.77806000  | 2.05293500  |
| H | 2.11006100  | 6.74408700  | 1.05395900  |
| H | 4.82075500  | -0.29446400 | 0.34710800  |
| H | 6.38849100  | -2.03625500 | 0.23907100  |
| H | 4.54594100  | 0.48540000  | -1.89809800 |
| H | 3.58031800  | -0.93323200 | -2.30218300 |
| H | 6.63779600  | -0.74167100 | -2.22968000 |
| H | 5.63822000  | -1.38257100 | -3.53691900 |
| H | 6.71902400  | -3.19101800 | -1.85712000 |
| H | 4.97802100  | -3.32333400 | -2.13723500 |
| C | -1.69652300 | 5.83366100  | -0.52840800 |
| C | 4.17949800  | -5.34265800 | 1.76995000  |
| H | -2.36713500 | 6.67736400  | -0.66150100 |
| H | 4.49089400  | -6.29728100 | 2.18363300  |

**Cb-2**

|   |             |             |             |
|---|-------------|-------------|-------------|
| C | 0.54249700  | -1.39107400 | -1.14360500 |
| C | -0.77773700 | -0.94292600 | -1.01466000 |
| C | -1.08451800 | 0.42791400  | -1.01214300 |
| C | -0.03729100 | 1.35670500  | -1.13510000 |
| C | 1.29032600  | 0.93715100  | -1.27071500 |
| C | 1.56308300  | -0.43891800 | -1.27849100 |
| H | -1.57423500 | -1.67589400 | -0.92337300 |
| H | -0.26049400 | 2.41826400  | -1.12874700 |
| H | 2.58955500  | -0.76977100 | -1.40082100 |
| C | -2.46830800 | 0.90032500  | -0.89138700 |
| C | -3.00200500 | 2.09254000  | -1.35569900 |
| S | -3.68392700 | -0.05554800 | -0.08295300 |
| C | -4.37180600 | 2.23335200  | -1.07435600 |
| H | -2.42353500 | 2.82251100  | -1.90993900 |
| C | -4.92165200 | 1.15499100  | -0.38826900 |
| H | -4.96633500 | 3.09217100  | -1.36927400 |
| C | -6.29440600 | 1.08222700  | -0.00339500 |
| H | -6.87542700 | 1.95555500  | -0.28781600 |
| C | -6.98990400 | 0.10542600  | 0.65648100  |
| C | -6.39006100 | -1.11021900 | 1.10368700  |
| N | -5.87614800 | -2.09328600 | 1.45760200  |
| C | -8.43602900 | 0.24343500  | 0.95521000  |
| O | -9.10238200 | -0.58820200 | 1.53372500  |
| O | -8.95875100 | 1.41799500  | 0.50929200  |
| H | -9.90038000 | 1.39348600  | 0.75976600  |
| C | 0.83520700  | -2.85190900 | -1.17004800 |
| C | 0.11675900  | -3.68854900 | -2.04489800 |
| C | 1.79120400  | -3.44724100 | -0.33698500 |
| C | 0.34755000  | -5.06453400 | -2.09307800 |
| H | -0.62047200 | -3.24518800 | -2.70864300 |
| C | 2.01173700  | -4.84089500 | -0.37843500 |
| C | 1.29757100  | -5.65448800 | -1.25945100 |
| H | -0.22097900 | -5.67803000 | -2.78666300 |
| H | 1.46882900  | -6.72715700 | -1.29165800 |
| C | 3.71127900  | 4.82011100  | 0.40080500  |
| C | 4.34773900  | 6.64784000  | 1.82728600  |
| C | 2.64534400  | 4.51535500  | 1.27028700  |
| C | 3.28838500  | 6.34484100  | 2.69032100  |
| H | 5.00561300  | 7.48221500  | 2.05537900  |
| C | 2.42959200  | 5.27502000  | 2.41476000  |
| H | 3.13167100  | 6.94535900  | 3.58232300  |
| H | 1.60843500  | 5.04453700  | 3.08958900  |
| C | 2.66539000  | -2.82462400 | 0.73874200  |
| H | 3.35745000  | -2.07114100 | 0.34203200  |
| C | 3.02275500  | -5.19112900 | 0.62806200  |
| C | 3.41259900  | -4.01616500 | 1.30051500  |
| C | 3.58346700  | -6.42350500 | 0.97112600  |
| C | 4.36320000  | -4.06613900 | 2.31402000  |
| H | 3.28630600  | -7.33427100 | 0.45741800  |
| H | 4.66843500  | -3.16232900 | 2.83630800  |
| C | 4.53681000  | -6.46898200 | 1.98998300  |
| C | 4.92431200  | -5.30121200 | 2.65703500  |
| H | 4.98194300  | -7.42050000 | 2.26838900  |
| H | 5.66701400  | -5.35420500 | 3.44854400  |
| C | 3.69975400  | 3.85792200  | -0.70924200 |
| C | 1.87052000  | 3.32520300  | 0.74402500  |

|   |            |             |             |
|---|------------|-------------|-------------|
| C | 2.61627300 | 2.97054400  | -0.53153700 |
| C | 4.56944900 | 3.71997200  | -1.79223300 |
| C | 2.39996300 | 1.91935100  | -1.43154900 |
| H | 5.40218100 | 4.40452600  | -1.92999500 |
| C | 4.35524300 | 2.67607600  | -2.69246400 |
| C | 3.29291900 | 1.78820700  | -2.51177100 |
| H | 5.01910800 | 2.54940000  | -3.54338300 |
| H | 3.13556000 | 0.98656500  | -3.22824300 |
| H | 0.81862000 | 3.58166600  | 0.56518500  |
| H | 1.85952800 | 2.48622200  | 1.45367400  |
| H | 2.06371100 | -2.31159500 | 1.50191600  |
| C | 4.56781800 | 5.88837000  | 0.67670300  |
| H | 5.39266100 | 6.12884000  | 0.01070700  |

**Cb-3**

|   |             |             |             |
|---|-------------|-------------|-------------|
| C | 0.38854700  | 5.85381100  | -2.13931500 |
| C | 0.72049400  | 4.57367300  | -2.61320300 |
| C | 0.33716300  | 3.42283200  | -1.92691800 |
| C | -0.38584800 | 3.58282600  | -0.74211400 |
| C | -0.74311300 | 4.86610600  | -0.25828900 |
| C | -0.34547700 | 6.00570000  | -0.96661200 |
| H | 0.70544700  | 6.73092500  | -2.69602700 |
| H | 1.28721300  | 4.47424000  | -3.53484300 |
| H | 0.59052100  | 2.43908700  | -2.30789100 |
| H | -0.61073100 | 6.99608800  | -0.60621900 |
| C | -1.59874000 | 3.26335000  | 1.15767300  |
| C | -2.25165200 | 2.72589800  | 2.26991300  |
| C | -2.84078000 | 3.61428500  | 3.16768200  |
| C | -2.77824700 | 5.00391100  | 2.97081700  |
| C | -2.11269000 | 5.53318200  | 1.86901500  |
| C | -1.51241500 | 4.66286800  | 0.95204500  |
| H | -2.29514300 | 1.65520400  | 2.43956000  |
| H | -3.35558400 | 3.21947300  | 4.03920600  |
| H | -3.24893900 | 5.66926600  | 3.68878600  |
| H | -2.05399800 | 6.60868000  | 1.72416000  |
| N | -0.90976200 | 2.61057200  | 0.12379900  |
| C | -0.77618400 | 1.20927700  | -0.02689800 |
| C | 0.49197800  | 0.63986900  | -0.17852000 |
| C | -1.91464600 | 0.39478200  | -0.01735800 |
| C | 0.63465100  | -0.74803300 | -0.33991500 |
| H | 1.36275000  | 1.28692400  | -0.17640400 |
| C | -1.77964200 | -0.99028600 | -0.16581000 |
| H | -2.89725400 | 0.83522200  | 0.10607500  |
| C | -0.51376300 | -1.55749400 | -0.33298200 |
| H | -0.42815700 | -2.63224000 | -0.44477800 |
| C | -4.05518400 | -1.67245000 | -0.97823500 |
| C | -3.12956400 | -2.93148600 | 0.67560000  |
| C | -4.30399000 | -0.73752900 | -1.98646700 |
| C | -4.98238200 | -2.70023300 | -0.67298300 |
| C | -2.30999300 | -3.44939800 | 1.68204700  |
| C | -4.39427700 | -3.50036200 | 0.38150800  |
| C | -5.51174300 | -0.83320400 | -2.67513800 |
| H | -3.58352000 | 0.03525600  | -2.23310900 |
| C | -6.18818200 | -2.77349000 | -1.37989300 |
| C | -2.76706600 | -4.56582300 | 2.37997900  |
| H | -1.35362600 | -2.99669300 | 1.92224500  |
| C | -4.82914000 | -4.62163700 | 1.09742900  |

|   |             |             |             |
|---|-------------|-------------|-------------|
| C | -6.44868200 | -1.83651000 | -2.37548600 |
| H | -5.72884500 | -0.11546400 | -3.46138100 |
| H | -6.90907400 | -3.55540500 | -1.15599700 |
| C | -4.01096300 | -5.15173600 | 2.09087800  |
| H | -2.14686700 | -4.98674400 | 3.16659300  |
| H | -5.79634100 | -5.06852500 | 0.88292000  |
| H | -7.38185900 | -1.88182200 | -2.92943600 |
| H | -4.33756200 | -6.02217700 | 2.65250400  |
| N | -2.92914000 | -1.81913700 | -0.15462600 |
| C | 1.95541600  | -1.36339700 | -0.51909100 |
| C | 2.25248600  | -2.55579900 | -1.15863600 |
| S | 3.39954200  | -0.60901400 | 0.10449200  |
| C | 3.62590400  | -2.85729900 | -1.15618000 |
| H | 1.50252400  | -3.17347800 | -1.63898700 |
| C | 4.41121400  | -1.90512900 | -0.51532900 |
| H | 4.05319900  | -3.74179400 | -1.61745600 |
| C | 5.83184100  | -2.00533000 | -0.39480500 |
| H | 6.24714700  | -2.90225800 | -0.84656500 |
| C | 6.74105800  | -1.16713100 | 0.18890200  |
| C | 6.37367200  | 0.05478600  | 0.82908800  |
| N | 6.04488700  | 1.04566100  | 1.34445800  |
| C | 8.19357000  | -1.47341800 | 0.19667000  |
| O | 9.04186000  | -0.76694400 | 0.69713700  |
| O | 8.48883600  | -2.64667100 | -0.42432100 |
| H | 9.45678200  | -2.74019400 | -0.35719400 |

**Cb-4**

|   |             |             |             |
|---|-------------|-------------|-------------|
| C | 0.01850700  | 1.38224500  | 0.19333900  |
| C | -0.89250800 | 0.31919000  | 0.29731300  |
| C | -0.47372800 | -1.01237300 | 0.16978000  |
| C | 0.88979000  | -1.26102300 | -0.05095800 |
| C | 1.82828700  | -0.22220900 | -0.15077000 |
| C | 1.37548900  | 1.09836900  | -0.03347100 |
| H | -1.93336200 | 0.52620100  | 0.52680300  |
| H | 1.22922100  | -2.28753900 | -0.14937800 |
| H | 2.07724100  | 1.91412500  | -0.17403900 |
| C | -0.42486800 | 2.77470000  | 0.31508800  |
| C | 0.31469700  | 3.87285800  | 0.72761700  |
| S | -2.05668600 | 3.23915200  | -0.09187400 |
| C | -0.42189200 | 5.06921500  | 0.72787000  |
| H | 1.34771100  | 3.80077200  | 1.04721800  |
| C | -1.74303400 | 4.92038800  | 0.31511600  |
| H | -0.01844600 | 6.03008200  | 1.03142800  |
| C | -2.67352800 | 5.99887300  | 0.24247400  |
| H | -2.25515800 | 6.95864300  | 0.53410100  |
| C | -3.99117300 | 6.02389000  | -0.13055000 |
| C | -4.70540600 | 4.85951200  | -0.54481800 |
| N | -5.26534200 | 3.89494900  | -0.87960600 |
| C | -4.77805100 | 7.27977100  | -0.12975200 |
| O | -5.94539000 | 7.36331300  | -0.44850800 |
| O | -4.05280400 | 8.35960500  | 0.27186200  |
| H | -4.66942300 | 9.11323700  | 0.23090400  |
| C | -1.44748300 | -2.12827000 | 0.28186200  |
| C | -2.74202400 | -2.00145500 | -0.24030600 |
| C | -1.08492200 | -3.33734400 | 0.91983000  |
| C | -3.64865900 | -3.05667900 | -0.12847300 |
| H | -3.03254800 | -1.08939700 | -0.75439800 |



|                    |             |             |             |
|--------------------|-------------|-------------|-------------|
| C                  | -1.96764000 | -4.40499300 | 1.04416700  |
| H                  | -0.09422600 | -3.42585800 | 1.35609500  |
| C                  | -3.25242200 | -4.26182900 | 0.51112900  |
| H                  | -1.65994700 | -5.31200300 | 1.55592600  |
| C                  | 3.26448700  | -0.51229800 | -0.39737700 |
| C                  | 4.26411700  | 0.23066900  | 0.24403100  |
| C                  | 3.64617600  | -1.54605100 | -1.28389700 |
| C                  | 5.61042700  | -0.05263900 | 0.00555000  |
| H                  | 3.98876600  | 1.00979900  | 0.94982800  |
| C                  | 4.97897600  | -1.84889200 | -1.54140000 |
| H                  | 2.87297000  | -2.10631900 | -1.80138600 |
| C                  | 5.96202200  | -1.09383200 | -0.89441400 |
| H                  | 5.23479300  | -2.64617400 | -2.23282100 |
| C                  | 6.85324400  | 0.50222700  | 0.50061300  |
| C                  | 7.89938600  | -0.22575200 | -0.12682600 |
| N                  | 7.34573900  | -1.17775700 | -0.97880300 |
| C                  | 7.16878900  | 1.52945200  | 1.39679400  |
| C                  | 9.24378900  | 0.05528000  | 0.13582000  |
| H                  | 10.04544200 | -0.50552600 | -0.33545300 |
| C                  | 8.50602100  | 1.81509600  | 1.65853600  |
| C                  | 9.52952200  | 1.08307000  | 1.03239400  |
| H                  | 6.37932000  | 2.09571100  | 1.88439200  |
| H                  | 8.76310100  | 2.60895000  | 2.35389200  |
| H                  | 10.56705200 | 1.31957600  | 1.25244900  |
| C                  | 8.09097000  | -2.16239600 | -1.74743900 |
| C                  | 8.37611200  | -3.45408300 | -0.97317500 |
| H                  | 7.52092600  | -2.37776300 | -2.65740400 |
| H                  | 9.02652100  | -1.69481300 | -2.07244200 |
| H                  | 8.96422500  | -3.24779200 | -0.07308000 |
| H                  | 7.44368200  | -3.93849400 | -0.66559200 |
| H                  | 8.93882000  | -4.15609300 | -1.59899000 |
| C                  | -5.02111100 | -3.24499000 | -0.55144300 |
| C                  | -5.39263300 | -4.55429700 | -0.14608400 |
| N                  | -4.30777500 | -5.16314200 | 0.48171900  |
| C                  | -5.94937400 | -2.43849000 | -1.21928100 |
| C                  | -6.67271000 | -5.05955800 | -0.39286400 |
| H                  | -6.96286800 | -6.05670300 | -0.07524100 |
| H                  | -5.68108600 | -1.43333000 | -1.53367400 |
| C                  | -7.22379700 | -2.93926100 | -1.47098600 |
| C                  | -7.57732800 | -4.23617900 | -1.06072900 |
| H                  | -7.95384000 | -2.32176900 | -1.98601500 |
| H                  | -8.57867700 | -4.60630700 | -1.26378300 |
| C                  | -4.31431000 | -6.48271300 | 1.09256200  |
| C                  | -4.77744100 | -6.47768400 | 2.55373900  |
| H                  | -4.95981200 | -7.12835700 | 0.48748300  |
| H                  | -3.30242600 | -6.89406300 | 1.01177300  |
| H                  | -4.12195300 | -5.85236000 | 3.16857200  |
| H                  | -5.79635500 | -6.08635100 | 2.63846700  |
| H                  | -4.76410300 | -7.49528300 | 2.96064500  |
| <b><u>Cb-5</u></b> |             |             |             |
| C                  | 0.17576900  | 2.40110100  | -0.40854000 |
| C                  | -1.16351100 | 1.98348900  | -0.34015500 |
| C                  | -1.49335200 | 0.62867800  | -0.20657200 |
| C                  | -0.45346700 | -0.31017300 | -0.13095100 |
| C                  | 0.89401100  | 0.07495300  | -0.19086300 |
| C                  | 1.19295300  | 1.43629700  | -0.33500900 |

|   |              |             |             |
|---|--------------|-------------|-------------|
| H | -0.69883200  | -1.36201900 | -0.02211300 |
| H | 2.22936400   | 1.74300800  | -0.43822500 |
| C | 1.97947900   | -0.93631300 | -0.12096900 |
| C | 3.18011500   | -0.66436700 | 0.55581000  |
| C | 1.84136200   | -2.19537800 | -0.72858100 |
| C | 4.20444500   | -1.60418100 | 0.61620800  |
| H | 3.31421000   | 0.29334500  | 1.05034300  |
| C | 2.85186600   | -3.14918600 | -0.65548500 |
| H | 0.93377900   | -2.43073800 | -1.27705700 |
| C | 4.04781500   | -2.86024800 | 0.01576700  |
| H | 5.13451200   | -1.36330800 | 1.12033000  |
| H | 2.71623800   | -4.12437300 | -1.11132600 |
| C | -2.91212600  | 0.19852400  | -0.12426700 |
| C | -3.90312500  | 0.81500100  | -0.90599500 |
| C | -3.30953600  | -0.83887400 | 0.73590700  |
| C | -5.23234700  | 0.40862900  | -0.84200000 |
| H | -3.62290000  | 1.59611000  | -1.60710900 |
| C | -4.63933900  | -1.23936200 | 0.82125300  |
| H | -2.57416200  | -1.31209500 | 1.38027900  |
| C | -5.61535800  | -0.62082400 | 0.02789900  |
| H | -5.97465400  | 0.86666700  | -1.48749300 |
| H | -4.93249900  | -2.01372500 | 1.52244300  |
| H | -1.95471900  | 2.72618300  | -0.33698600 |
| C | 0.49084100   | 3.82663100  | -0.55268300 |
| C | -0.28858900  | 4.81808700  | -1.12729100 |
| S | 1.99493100   | 4.48009500  | 0.04204500  |
| C | 0.31880300   | 6.08563600  | -1.10039300 |
| H | -1.25362600  | 4.62217400  | -1.58004700 |
| C | 1.57603600   | 6.09702100  | -0.50446400 |
| H | -0.13104400  | 6.98281100  | -1.51352700 |
| C | 2.37728800   | 7.27124000  | -0.37074400 |
| H | 1.91216100   | 8.16755200  | -0.77253000 |
| C | 3.61979800   | 7.44929700  | 0.17457500  |
| C | 4.37734600   | 6.38386500  | 0.74804500  |
| C | 4.27521800   | 8.77958400  | 0.20765600  |
| N | 4.97250100   | 5.49571500  | 1.20933200  |
| O | 5.37247300   | 8.99463900  | 0.67655400  |
| O | 3.51282100   | 9.75860500  | -0.35004900 |
| H | 4.04041400   | 10.57439800 | -0.27135200 |
| C | -8.07122600  | -0.17975500 | 0.25283900  |
| C | -9.22741200  | -0.89862600 | 0.31302400  |
| C | -8.88528800  | -2.28705400 | 0.19371000  |
| N | -6.97076100  | -1.01909100 | 0.11261200  |
| C | -8.25008500  | 1.28710600  | 0.50675100  |
| C | -10.40867400 | -0.01182700 | 0.59284500  |
| C | -9.80328600  | 1.41517700  | 0.38211400  |
| H | -11.26673700 | -0.18550500 | -0.06841500 |
| H | -10.77628300 | -0.14267900 | 1.62124500  |
| H | -7.89516700  | 1.56246300  | 1.51109300  |
| H | -7.72900100  | 1.94490300  | -0.19821600 |
| H | -10.21118000 | 2.14972600  | 1.08315000  |
| H | -10.04767200 | 1.76114100  | -0.62807100 |
| C | -7.46371200  | -2.33417400 | 0.06174100  |
| C | 5.60733300   | -4.58349000 | -0.96068400 |
| C | 6.61432000   | -5.45031600 | -0.43584100 |
| C | 6.67825300   | -5.17869000 | 0.97152600  |

|   |              |             |             |
|---|--------------|-------------|-------------|
| N | 5.07800500   | -3.82766700 | 0.09916300  |
| C | 5.76182200   | -4.20891600 | 1.24904200  |
| C | 6.87365900   | -4.63187700 | 3.28517900  |
| C | 5.61018000   | -3.91197700 | 2.71094100  |
| C | 7.33337300   | -5.68690100 | 2.22554500  |
| H | 6.97931700   | -6.69551300 | 2.48510600  |
| H | 8.42732400   | -5.74687000 | 2.16738700  |
| H | 6.67977000   | -5.08030000 | 4.26433100  |
| H | 7.66911100   | -3.89111000 | 3.42010900  |
| H | 5.59706100   | -2.84656900 | 2.96702600  |
| H | 4.67790200   | -4.34006700 | 3.10864900  |
| C | 7.29974700   | -6.30673000 | -1.31228000 |
| C | 5.31694200   | -4.53751300 | -2.32679600 |
| C | 6.01619200   | -5.39825100 | -3.16936100 |
| C | 6.99229700   | -6.27905300 | -2.66765400 |
| H | 8.06686700   | -6.97688500 | -0.93307900 |
| H | 4.57616100   | -3.85132500 | -2.72439700 |
| H | 5.80375500   | -5.38473200 | -4.23488900 |
| H | 7.51727000   | -6.93957200 | -3.35248600 |
| C | -6.78369200  | -3.53888200 | -0.13523200 |
| C | -7.53398900  | -4.71195100 | -0.16119600 |
| C | -8.93243900  | -4.68873300 | -0.00592800 |
| C | -9.61192500  | -3.48811500 | 0.16474300  |
| H | -5.70703800  | -3.56481500 | -0.26888600 |
| H | -7.02696900  | -5.66187400 | -0.30675500 |
| H | -9.48704600  | -5.62293300 | -0.02778000 |
| H | -10.69385700 | -3.47511400 | 0.26761600  |

### **Cb-6**

|   |             |             |             |
|---|-------------|-------------|-------------|
| C | 1.19882300  | 1.62602200  | -0.39376700 |
| C | 0.14966800  | 2.55661000  | -0.45714900 |
| C | -1.17399700 | 2.09442200  | -0.37771200 |
| C | -1.45757600 | 0.73003400  | -0.23950200 |
| C | -0.38698200 | -0.17468000 | -0.17356600 |
| C | 0.94639700  | 0.25540100  | -0.24825000 |
| H | 2.22344700  | 1.96727200  | -0.50568500 |
| H | -1.99172200 | 2.80645600  | -0.42295300 |
| H | -0.59492800 | -1.22718500 | -0.00748000 |
| C | 0.41469000  | 3.99041400  | -0.62190600 |
| C | -0.40044600 | 4.94712600  | -1.20535300 |
| S | 1.89840600  | 4.70147600  | -0.04252500 |
| C | 0.16392700  | 6.23497300  | -1.19669900 |
| H | -1.35963300 | 4.71316300  | -1.65257100 |
| C | 1.42229200  | 6.29641100  | -0.60664500 |
| H | -0.31785200 | 7.11101000  | -1.61904200 |
| C | 2.18399400  | 7.49881100  | -0.49023500 |
| H | 1.68734600  | 8.37411200  | -0.90051300 |
| C | 3.42185400  | 7.72455300  | 0.04745100  |
| C | 4.21664600  | 6.69143800  | 0.62962200  |
| N | 4.84210300  | 5.82819100  | 1.09801300  |
| C | 4.03298700  | 9.07635800  | 0.06242200  |
| O | 5.12433900  | 9.33258200  | 0.52411000  |
| O | 3.23620900  | 10.02269300 | -0.50307200 |
| H | 3.73624500  | 10.85672900 | -0.43631300 |
| C | 2.06588500  | -0.71717000 | -0.17187100 |
| C | 1.96839300  | -1.98581000 | -0.76692600 |
| C | 3.25952100  | -0.40009800 | 0.49785600  |

|   |             |             |             |
|---|-------------|-------------|-------------|
| C | 3.00967600  | -2.90514100 | -0.68964900 |
| H | 1.06630600  | -2.25708600 | -1.30777700 |
| C | 4.31518100  | -1.30386800 | 0.56426800  |
| H | 3.36412900  | 0.56609400  | 0.98275500  |
| C | 4.19683300  | -2.56925900 | -0.02550700 |
| H | 2.90158300  | -3.89013400 | -1.13171300 |
| H | 5.23876100  | -1.02595500 | 1.06118000  |
| C | -2.86125800 | 0.25405400  | -0.14222100 |
| C | -3.82768200 | 0.97774000  | 0.57561100  |
| C | -3.26803700 | -0.93648500 | -0.76669500 |
| C | -5.14633300 | 0.54146900  | 0.65882000  |
| H | -3.54220300 | 1.89250900  | 1.08708700  |
| C | -4.57926200 | -1.39273000 | -0.67428900 |
| H | -2.54871700 | -1.51255500 | -1.34167600 |
| C | -5.53317600 | -0.65277700 | 0.03666800  |
| H | -5.88275600 | 1.13045800  | 1.19563600  |
| H | -4.86501300 | -2.32980200 | -1.14079000 |
| C | 6.05759400  | -3.76397900 | 1.16525500  |
| C | 5.71589600  | -4.32770500 | -0.97807200 |
| C | 6.99881500  | -4.74700100 | 0.84206300  |
| C | 6.77970300  | -5.10671200 | -0.51100000 |
| C | -7.68187600 | -1.08868100 | 1.26194400  |
| C | -7.63366500 | -1.65500900 | -0.90715100 |
| C | -8.93780700 | -1.61716100 | 0.94550000  |
| C | -8.90572200 | -1.97958800 | -0.42412200 |
| N | 5.26150800  | -3.49662100 | 0.04875400  |
| N | -6.86975700 | -1.10582400 | 0.12545600  |
| C | -7.52861200 | -0.73712600 | 2.63456000  |
| C | -8.60251400 | -2.41994200 | -2.84815300 |
| C | -7.46234200 | -1.89757800 | -2.30102400 |
| C | -8.67843400 | -0.98774500 | 3.33253700  |
| S | -9.96299600 | -1.66773700 | 2.34877800  |
| S | -9.90986300 | -2.61449200 | -1.69352800 |
| C | 5.41517500  | -4.52273800 | -2.35744000 |
| C | 6.10255700  | -3.34164300 | 2.52570100  |
| C | 7.09030300  | -3.99896100 | 3.20698000  |
| C | 6.24422700  | -5.46121900 | -2.90886400 |
| S | 7.41464600  | -6.11569800 | -1.77652900 |
| S | 7.97511500  | -5.15151300 | 2.22255700  |
| H | 7.36801800  | -3.87411100 | 4.24471900  |
| H | 5.45076100  | -2.60488600 | 2.97871200  |
| H | 6.24196900  | -5.82307700 | -3.92802100 |
| H | 4.64373500  | -4.00407800 | -2.91316800 |
| H | -8.76283800 | -2.71572600 | -3.87599000 |
| H | -6.56200800 | -1.69813100 | -2.86901400 |
| H | -8.86178400 | -0.80922900 | 4.38332400  |
| H | -6.63103200 | -0.33098900 | 3.08442900  |

**Cb-7**

|   |             |             |            |
|---|-------------|-------------|------------|
| C | 0.39321900  | 2.18833200  | 0.64341900 |
| C | 1.30601400  | 1.12423300  | 0.57431100 |
| C | 0.86921900  | -0.19978600 | 0.42313700 |
| C | -0.51272900 | -0.43677100 | 0.34736500 |
| C | -1.45345000 | 0.60303600  | 0.42617000 |
| C | -0.98251400 | 1.91515300  | 0.57069600 |
| H | 2.36731400  | 1.32197400  | 0.68919200 |
| H | -0.86344100 | -1.44868100 | 0.17024800 |

|   |              |             |             |
|---|--------------|-------------|-------------|
| H | -1.69364900  | 2.73301600  | 0.62555000  |
| C | 0.85421300   | 3.57004400  | 0.81319100  |
| C | 0.17627600   | 4.63307400  | 1.39136200  |
| S | 2.42912200   | 4.06746900  | 0.25044000  |
| C | 0.91539000   | 5.82774900  | 1.39201600  |
| H | -0.81048400  | 4.53435500  | 1.82843200  |
| C | 2.17741100   | 5.71342800  | 0.81527500  |
| H | 0.55762400   | 6.76219700  | 1.81283900  |
| C | 3.09991700   | 6.79576600  | 0.71349200  |
| H | 2.72421000   | 7.73118600  | 1.11982400  |
| C | 4.36662200   | 6.85046100  | 0.19446800  |
| C | 5.02273200   | 5.72006100  | -0.37925200 |
| N | 5.53673200   | 4.78302800  | -0.84170800 |
| C | 5.15570500   | 8.10456900  | 0.19483100  |
| O | 6.28001700   | 8.21343100  | -0.24749700 |
| O | 4.48710300   | 9.15183300  | 0.75157500  |
| H | 5.10000300   | 9.90745300  | 0.69462000  |
| C | 1.84209200   | -1.31495600 | 0.33973300  |
| C | 3.08993000   | -1.14655200 | -0.29826900 |
| C | 1.56196000   | -2.56896100 | 0.90618400  |
| C | 3.98960600   | -2.19433600 | -0.36972600 |
| H | 3.34010200   | -0.19119200 | -0.75327000 |
| C | 2.45871600   | -3.63674900 | 0.84305100  |
| H | 0.62908800   | -2.70991600 | 1.44522700  |
| C | 3.67965700   | -3.45028100 | 0.18314300  |
| H | 2.21574600   | -4.57506200 | 1.32722400  |
| C | -2.90688100  | 0.32193000  | 0.33364800  |
| C | -3.46214400  | -0.82274400 | 0.92771100  |
| C | -3.78023900  | 1.20043600  | -0.34214000 |
| C | -4.82499200  | -1.11747900 | 0.85914500  |
| H | -2.81719700  | -1.48976900 | 1.49320400  |
| C | -5.13331600  | 0.92369300  | -0.42025300 |
| H | -3.38324300  | 2.09099200  | -0.82343400 |
| C | -5.66800700  | -0.24095000 | 0.16555800  |
| H | -5.21367400  | -1.99161600 | 1.36760400  |
| N | -7.05094700  | -0.29324400 | -0.02080600 |
| C | -6.23951900  | 1.70115400  | -1.08804700 |
| C | -7.54061600  | 0.96510300  | -0.62591700 |
| C | -8.40982500  | 0.76822700  | -1.89685900 |
| C | -6.28446900  | 1.65648400  | -2.63669700 |
| C | -7.78739100  | 1.70541400  | -2.95114400 |
| C | -7.92329600  | -1.31766800 | 0.38209500  |
| C | -9.21945500  | -1.00894600 | 0.83430900  |
| C | -7.54643800  | -2.67187800 | 0.30444300  |
| C | -10.09753100 | -2.02189500 | 1.21474200  |
| H | -9.53751800  | 0.02647000  | 0.89792300  |
| C | -8.42808000  | -3.67508700 | 0.70076800  |
| H | -6.57390300  | -2.93561600 | -0.09563800 |
| C | -9.70839500  | -3.36106000 | 1.16068700  |
| H | -11.09225300 | -1.75712500 | 1.56408600  |
| H | -8.11399100  | -4.71337000 | 0.63038200  |
| H | -10.39414200 | -4.14719600 | 1.46274700  |
| C | 5.37246200   | -2.22389600 | -0.97972600 |
| C | 5.91376100   | -3.64324500 | -0.58814100 |
| C | 5.41238500   | -2.17406300 | -2.53649700 |
| C | 6.37979800   | -4.28967700 | -1.90838500 |

|   |             |             |             |
|---|-------------|-------------|-------------|
| H | 7.42865500  | -4.01529900 | -2.08397600 |
| C | 5.48418800  | -3.64574300 | -2.97837900 |
| N | 4.74317900  | -4.33503600 | 0.00763900  |
| C | 4.78259800  | -5.68863100 | 0.38393500  |
| C | 3.65484500  | -6.51872700 | 0.23967600  |
| C | 5.97106900  | -6.25599600 | 0.87981200  |
| C | 3.70999900  | -7.85953000 | 0.61421200  |
| H | 2.74560900  | -6.11590500 | -0.19245300 |
| C | 6.01898700  | -7.60221300 | 1.23665900  |
| H | 6.85659500  | -5.63994800 | 0.99631500  |
| C | 4.88920400  | -8.41288700 | 1.11659500  |
| H | 2.82553300  | -8.47981100 | 0.49298400  |
| H | 6.94811500  | -8.01561100 | 1.62060500  |
| H | 4.92936300  | -9.46019500 | 1.40142600  |
| H | 6.72264000  | -3.58339700 | 0.14991500  |
| H | 5.99577900  | -1.42853300 | -0.55800700 |
| H | 6.32659300  | -5.38200400 | -1.88192300 |
| H | 5.87575800  | -3.76852400 | -3.99366900 |
| H | 4.48599700  | -4.10038600 | -2.95325000 |
| H | 6.31658300  | -1.64471800 | -2.86211600 |
| H | 4.55251900  | -1.63770200 | -2.95013500 |
| H | -8.07352300 | 1.55542300  | 0.13139800  |
| H | -6.25772500 | 2.74678500  | -0.75901500 |
| H | -9.47055000 | 0.97131700  | -1.72024600 |
| H | -8.32922100 | -0.27367900 | -2.22596100 |
| H | -8.16341700 | 2.72891600  | -2.81838500 |
| H | -8.02480300 | 1.40297800  | -3.97671500 |
| H | -5.71348800 | 2.47039300  | -3.09569700 |
| H | -5.85540100 | 0.71112500  | -2.99182300 |

**Cb-8**

|   |             |             |             |
|---|-------------|-------------|-------------|
| C | -1.26409800 | 1.42631800  | 0.32964700  |
| C | -0.27468900 | 2.42215600  | 0.34730600  |
| C | 1.07577000  | 2.04384400  | 0.26734300  |
| C | 1.44495600  | 0.69545000  | 0.17647900  |
| C | 0.43059200  | -0.27421100 | 0.15227800  |
| C | -0.92817200 | 0.06959100  | 0.22484200  |
| H | -2.30701800 | 1.70516800  | 0.44570500  |
| H | 1.84431900  | 2.80856800  | 0.22064800  |
| H | 0.70621100  | -1.32123600 | 0.07278700  |
| C | -0.62983100 | 3.84154900  | 0.44503700  |
| C | 0.13303900  | 4.87843200  | 0.96074100  |
| S | -2.16705600 | 4.42751100  | -0.13607300 |
| C | -0.51246300 | 6.12485200  | 0.90081400  |
| H | 1.11471200  | 4.72799600  | 1.39450900  |
| C | -1.78444000 | 6.07683000  | 0.33716500  |
| H | -0.07988700 | 7.05043100  | 1.26737200  |
| C | -2.62155300 | 7.22078800  | 0.17977900  |
| H | -2.17327300 | 8.14398500  | 0.53753200  |
| C | -3.88143400 | 7.34613500  | -0.34266400 |
| C | -4.57199300 | 8.65585200  | -0.40703500 |
| O | -5.68494400 | 8.82819800  | -0.85749000 |
| O | -3.82423300 | 9.67491000  | 0.09867200  |
| H | -4.37680500 | 10.47189400 | 0.00204700  |
| C | -4.62278700 | 6.24202700  | -0.86119000 |
| N | -5.20639000 | 5.32496800  | -1.27880800 |
| C | -8.05021800 | -2.61562100 | -1.87401300 |

|   |             |             |             |
|---|-------------|-------------|-------------|
| C | -6.28607100 | -0.94479200 | -1.81440700 |
| C | -7.29317800 | -3.51050700 | -1.12076300 |
| H | -9.04679500 | -2.90632700 | -2.19539900 |
| C | -5.50416400 | -1.82526300 | -1.05730000 |
| H | -5.91013100 | 0.04087900  | -2.07557800 |
| C | -6.01668800 | -3.10473500 | -0.72347100 |
| H | -7.68387700 | -4.48546900 | -0.84777700 |
| C | 2.87561200  | 0.30484800  | 0.08490200  |
| C | 3.84773200  | 0.96934700  | 0.84312200  |
| C | 3.27955100  | -0.74426700 | -0.77412300 |
| C | 5.18922100  | 0.59101200  | 0.74942000  |
| H | 3.55300900  | 1.76420700  | 1.52301700  |
| C | 4.60727800  | -1.14124800 | -0.88745600 |
| H | 2.53183200  | -1.23693100 | -1.38877800 |
| C | 5.55913500  | -0.47136600 | -0.11454500 |
| H | 4.89334900  | -1.93737500 | -1.56715400 |
| N | -5.06598500 | -3.79210700 | 0.04073100  |
| C | -4.18497900 | -1.73721700 | -0.46505600 |
| C | -3.95208200 | -2.96799500 | 0.20080200  |
| C | -5.20957200 | -5.10827000 | 0.56248000  |
| C | -5.17007800 | -5.33079500 | 1.94586900  |
| C | -5.39248000 | -6.19417800 | -0.29952800 |
| C | -5.29894000 | -6.61643000 | 2.45985200  |
| H | -5.04350300 | -4.48676200 | 2.61695300  |
| C | -5.54410400 | -7.48215000 | 0.21118600  |
| H | -5.41139200 | -6.02806500 | -1.37219000 |
| C | -5.49204100 | -7.69817500 | 1.59251000  |
| H | -5.26757800 | -6.79918900 | 3.52907900  |
| H | -5.68961800 | -8.32075600 | -0.46718800 |
| O | -5.62301100 | -8.93655300 | 2.15354700  |
| H | -5.75458500 | -9.59198300 | 1.45089600  |
| C | -2.74596200 | -3.21680600 | 0.86080000  |
| C | -3.19871200 | -0.74881000 | -0.45570000 |
| H | -3.36197800 | 0.18473100  | -0.98702600 |
| H | -2.56611800 | -4.15810600 | 1.36994100  |
| C | -1.78152600 | -2.21507900 | 0.85527100  |
| C | -1.98475500 | -0.97428400 | 0.20676000  |
| H | -0.85170300 | -2.38341700 | 1.39072700  |
| C | 6.40721800  | 1.06311700  | 1.37551000  |
| C | 7.46475900  | 0.26986400  | 0.86085700  |
| N | 6.93963700  | -0.65945700 | -0.04321400 |
| C | 7.68654500  | -1.63292400 | -0.76532900 |
| C | 7.44167000  | -2.99626200 | -0.57406100 |
| C | 8.67484200  | -1.23480700 | -1.67605100 |
| C | 8.16463500  | -3.94944900 | -1.28926400 |
| H | 6.68654900  | -3.30905700 | 0.14050800  |
| C | 9.41380900  | -2.18163600 | -2.37651900 |
| H | 8.85652600  | -0.17626500 | -1.83491400 |
| C | 9.15709000  | -3.54513500 | -2.18881100 |
| H | 7.96511100  | -5.00839000 | -1.13650900 |
| H | 10.18274100 | -1.88403300 | -3.08203000 |
| O | 9.90625500  | -4.42902200 | -2.91097300 |
| H | 9.63250600  | -5.33323400 | -2.69157800 |
| C | 8.78703500  | 0.45123600  | 1.27448200  |
| C | 6.69055400  | 2.06329900  | 2.31308600  |
| H | 9.58785100  | -0.16896700 | 0.88498800  |

|            |              |             |             |
|------------|--------------|-------------|-------------|
| H          | 5.89191600   | 2.67951300  | 2.71812400  |
| C          | 9.04073100   | 1.45318800  | 2.20857200  |
| C          | 8.00667900   | 2.25477200  | 2.72334000  |
| H          | 10.06075300  | 1.61489600  | 2.54657300  |
| H          | 8.23893200   | 3.02806500  | 3.44998400  |
| C          | -7.55496600  | -1.34656600 | -2.22137700 |
| H          | -8.17139400  | -0.67220900 | -2.80863700 |
| <b>H-1</b> |              |             |             |
| C          | 0.92345800   | -0.20943800 | 0.20641600  |
| C          | 1.05285000   | -1.59938300 | 0.32873100  |
| C          | -0.06872700  | -2.44178200 | 0.27519900  |
| C          | -1.34042000  | -1.87116000 | 0.10320200  |
| C          | -1.50240200  | -0.48501500 | -0.01526600 |
| C          | -0.36044300  | 0.32969700  | 0.03471100  |
| H          | 2.03424000   | -2.02475100 | 0.51489200  |
| H          | -2.21382100  | -2.51375100 | 0.05987700  |
| H          | -0.46865400  | 1.39915500  | -0.11692100 |
| C          | -2.84982900  | 0.10479300  | -0.21441200 |
| C          | -4.47440900  | 1.86504400  | 0.23369000  |
| C          | -3.81230300  | -0.52153200 | -1.01881900 |
| C          | -5.43855000  | 1.23567100  | -0.57964500 |
| C          | -5.07345700  | 0.03717800  | -1.21221200 |
| H          | -3.56133600  | -1.44078800 | -1.54022800 |
| H          | -5.77255900  | -0.46526900 | -1.87055400 |
| C          | -6.76917300  | 3.23258100  | -0.92510200 |
| C          | -5.96636000  | 4.07003800  | -0.12622600 |
| S          | -4.93786100  | 3.33435300  | 1.13118900  |
| N          | -6.71597100  | 1.82487600  | -0.73166100 |
| C          | -7.58166100  | 3.83244600  | -1.89999000 |
| C          | -5.99725300  | 5.45562600  | -0.28390000 |
| H          | -5.35591900  | 6.07297300  | 0.33870400  |
| H          | -8.17034000  | 3.21807400  | -2.57191500 |
| C          | -7.63675500  | 5.22119000  | -2.02892800 |
| C          | -6.85070800  | 6.03971800  | -1.22047200 |
| H          | -8.28708200  | 5.65747600  | -2.78203000 |
| H          | -6.88646700  | 7.12001600  | -1.32468900 |
| C          | -7.82477400  | 0.99726000  | -1.21546400 |
| C          | -8.25296100  | -0.14985400 | -0.26886100 |
| C          | -8.69371200  | 0.38624700  | 1.12184000  |
| C          | -9.37341000  | -0.95620800 | -0.97739200 |
| C          | -7.62166800  | 0.32168100  | 2.21561000  |
| C          | -9.40641500  | -2.46498500 | -0.67095500 |
| C          | -9.70797000  | -2.86728800 | 0.77927900  |
| C          | -9.80265200  | -4.38667200 | 0.95827200  |
| H          | -8.68698600  | 1.65801400  | -1.32714300 |
| H          | -7.60853300  | 0.59563100  | -2.21803300 |
| H          | -7.39659500  | -0.82246900 | -0.12610000 |
| H          | -9.03697100  | 1.42442200  | 1.01337600  |
| H          | -9.56850000  | -0.18042000 | 1.46001300  |
| H          | -8.02116000  | 0.68259000  | 3.17064800  |
| H          | -7.27809500  | -0.70942200 | 2.36977100  |
| H          | -10.34859100 | -0.50804000 | -0.73711500 |
| H          | -9.26050900  | -0.85398500 | -2.06626600 |
| H          | -10.16158200 | -2.92777800 | -1.32285400 |
| H          | -8.44332100  | -2.90648600 | -0.96925500 |
| H          | -10.01683100 | -4.65431300 | 1.99914800  |



|   |              |             |             |
|---|--------------|-------------|-------------|
| H | -10.59864800 | -4.81100500 | 0.33393600  |
| H | -8.86374400  | -4.87840000 | 0.67460400  |
| H | -6.75054900  | 0.93410100  | 1.96880000  |
| H | -8.93152900  | -2.47443600 | 1.44805000  |
| H | -10.65204800 | -2.40312000 | 1.09825800  |
| C | 2.12180200   | 0.66482500  | 0.25235300  |
| C | 2.07265700   | 1.93022600  | 0.85576200  |
| C | 3.33817300   | 0.26374400  | -0.32049800 |
| C | 3.20278600   | 2.74386400  | 0.92509000  |
| H | 1.15139500   | 2.27547100  | 1.31632900  |
| C | 4.45603800   | 1.09197300  | -0.28816400 |
| H | 3.40167100   | -0.68570700 | -0.84387200 |
| C | 4.42695200   | 2.33648300  | 0.35994900  |
| H | 5.35976500   | 0.77902800  | -0.79570900 |
| C | 5.42870900   | 4.56403900  | 0.33170300  |
| C | 4.30773300   | 5.21615600  | 0.87733800  |
| C | 6.39836000   | 5.34711000  | -0.31260600 |
| C | 4.15916700   | 6.60082300  | 0.76278500  |
| H | 7.25742100   | 4.85783200  | -0.75754900 |
| H | 3.27421700   | 7.07528400  | 1.17798000  |
| C | 6.27104400   | 6.73366600  | -0.38700500 |
| C | 5.14707700   | 7.36603300  | 0.14443100  |
| H | 5.03346600   | 8.44388400  | 0.07377300  |
| H | 7.04468700   | 7.31510000  | -0.88088900 |
| N | 5.58422300   | 3.15360100  | 0.41846500  |
| S | 3.10772700   | 4.28581800  | 1.81293600  |
| C | 6.79939700   | 2.62658100  | 1.08450200  |
| C | 7.72658900   | 1.67370500  | 0.28975600  |
| C | 8.10239300   | 2.24537100  | -1.09228200 |
| C | 8.98040700   | 1.35920600  | 1.13810600  |
| C | 8.72137600   | 0.58400700  | 2.43753200  |
| C | 8.80076600   | 1.28023400  | -2.06863300 |
| C | 7.94007900   | 0.09782000  | -2.53693100 |
| C | 8.64160700   | -0.76968200 | -3.58760900 |
| H | 9.66757200   | 0.31442400  | 2.92023200  |
| H | 8.14050400   | 1.16282600  | 3.16346600  |
| H | 8.17448900   | -0.34629100 | 2.24026900  |
| H | 9.67634000   | 0.77460700  | 0.52476900  |
| H | 7.19031000   | 2.62281900  | -1.57309300 |
| H | 8.75396400   | 3.11950000  | -0.94075100 |
| H | 9.10653100   | 1.85860600  | -2.95210500 |
| H | 9.73297400   | 0.89725000  | -1.63091100 |
| H | 7.66586300   | -0.53241400 | -1.68025000 |
| H | 6.99626500   | 0.48143700  | -2.95130100 |
| H | 8.00803300   | -1.60591100 | -3.90340400 |
| H | 8.89322500   | -0.18407700 | -4.48047700 |
| H | 9.57526200   | -1.19020200 | -3.19417800 |
| H | 9.50104500   | 2.30124700  | 1.36751200  |
| H | 7.19295100   | 0.72578800  | 0.14574400  |
| H | 7.38189800   | 3.50331400  | 1.38689900  |
| H | 6.48355100   | 2.12392500  | 2.00707400  |
| C | 0.06714200   | -3.89551900 | 0.41617800  |
| C | -0.87252200  | -4.79943800 | 0.88732900  |
| S | 1.54138900   | -4.70866400 | -0.04114700 |
| C | -0.41123700  | -6.12700900 | 0.89061600  |
| H | -1.84973500  | -4.50042700 | 1.24822400  |

|   |             |              |             |
|---|-------------|--------------|-------------|
| C | 0.89116300  | -6.27450600  | 0.42276100  |
| H | -0.99805700 | -6.97210500  | 1.23636900  |
| C | 1.56484300  | -7.52984000  | 0.34290400  |
| H | 0.96214900  | -8.37231400  | 0.67184500  |
| C | 2.83067000  | -7.84285500  | -0.07469600 |
| C | 3.76172600  | -6.86489400  | -0.53777500 |
| N | 4.50199700  | -6.04701300  | -0.91060700 |
| C | 3.33038700  | -9.23874500  | -0.07268200 |
| O | 4.44033400  | -9.57403500  | -0.42816100 |
| O | 2.40621700  | -10.13131500 | 0.37586800  |
| H | 2.84444000  | -11.00080100 | 0.33208300  |
| C | -3.20361800 | 1.32005000   | 0.39348400  |
| H | -2.49209100 | 1.83262100   | 1.03422900  |

## H-2

|   |             |             |             |
|---|-------------|-------------|-------------|
| C | -1.26885400 | 1.68026300  | -0.27706500 |
| C | -1.31897800 | 3.06802100  | -0.07210300 |
| C | -0.14787000 | 3.83976700  | -0.05061100 |
| C | 1.09023800  | 3.21007100  | -0.25250100 |
| C | 1.16918100  | 1.82779200  | -0.47631500 |
| C | -0.01734800 | 1.07768800  | -0.47870500 |
| H | -2.28088300 | 3.54805400  | 0.07562900  |
| H | 2.00060700  | 3.79929700  | -0.24205000 |
| H | 0.03554000  | 0.00573200  | -0.64545700 |
| C | -0.19682300 | 5.28777400  | 0.18504600  |
| C | 0.79315100  | 6.09336300  | 0.72545300  |
| S | -1.61108200 | 6.22418500  | -0.22340100 |
| C | 0.41826800  | 7.44473300  | 0.81887200  |
| H | 1.74501800  | 5.70753100  | 1.07131800  |
| C | -0.86654400 | 7.70815800  | 0.35440400  |
| H | 1.05456100  | 8.22384700  | 1.22644900  |
| C | -1.45616200 | 9.00808100  | 0.35964300  |
| H | -0.80105500 | 9.78410200  | 0.74667300  |
| C | -2.69600400 | 9.43188100  | -0.03622800 |
| C | -3.68799400 | 8.55126100  | -0.56356100 |
| N | -4.47984800 | 7.81107200  | -0.98886300 |
| C | -3.10207800 | 10.85482900 | 0.06110800  |
| O | -4.18590100 | 11.28636500 | -0.26989300 |
| O | -2.12237100 | 11.65134200 | 0.56870900  |
| H | -2.50158600 | 12.54907400 | 0.58429700  |
| C | -2.50798600 | 0.89290700  | -0.27649700 |
| C | -3.70869200 | 1.18906000  | 0.33072900  |
| S | -2.62482900 | -0.64365400 | -1.11070900 |
| C | -4.70988100 | 0.20104400  | 0.13444200  |
| H | -3.86874300 | 2.08621700  | 0.91905400  |
| C | -4.29229100 | -0.86800200 | -0.62415700 |
| H | -5.71817700 | 0.28081300  | 0.52520500  |
| C | 2.47456700  | 1.19632300  | -0.70688000 |
| C | 3.60907200  | 1.75554700  | -1.25267200 |
| S | 2.78160300  | -0.47218000 | -0.27099800 |
| C | 4.70910400  | 0.86021300  | -1.33054100 |
| H | 3.64151500  | 2.77267100  | -1.62886300 |
| C | 4.43566000  | -0.39721900 | -0.84314500 |
| C | -5.07032200 | -2.33560000 | -2.46641800 |
| C | -6.62505800 | -4.17839000 | -2.15672100 |
| C | -5.06129900 | -2.03378900 | -1.09671800 |
| H | -4.49497100 | -1.71124900 | -3.14305300 |

|   |              |             |             |
|---|--------------|-------------|-------------|
| C | -6.59819100  | -3.90647000 | -0.78708000 |
| H | -7.23500400  | -4.98054800 | -2.55792000 |
| C | -5.82590300  | -2.84997900 | -0.22938900 |
| C | -6.02964000  | -2.90864000 | 1.21053500  |
| C | -6.93719100  | -3.97443500 | 1.45112300  |
| N | -7.27916500  | -4.56857200 | 0.23497200  |
| C | -5.51033500  | -2.20886200 | 2.31153400  |
| C | -7.33478800  | -4.33850600 | 2.74064100  |
| H | -4.79978600  | -1.40440300 | 2.16420800  |
| H | -8.01994600  | -5.16404500 | 2.90267600  |
| C | -5.90449000  | -2.56459600 | 3.59738000  |
| C | -6.81059300  | -3.61724100 | 3.80879200  |
| H | -5.50302600  | -2.02297100 | 4.44919800  |
| H | -7.10327800  | -3.87988900 | 4.82181700  |
| C | -8.14923400  | -5.68277400 | 0.07152700  |
| C | -9.48072300  | -5.59787700 | 0.49633600  |
| C | -7.67654900  | -6.86609000 | -0.50910100 |
| C | -10.32943800 | -6.69463900 | 0.34698800  |
| H | -9.84230700  | -4.67165400 | 0.93226800  |
| C | -8.53675800  | -7.95188300 | -0.67249400 |
| H | -6.63816600  | -6.92980200 | -0.81938900 |
| C | -9.86249900  | -7.87154700 | -0.24165800 |
| H | -11.36110100 | -6.62324400 | 0.68027300  |
| H | -8.16484700  | -8.86666400 | -1.12571100 |
| H | -10.52795400 | -8.72149600 | -0.36366400 |
| C | 5.28912900   | -1.59855600 | -0.82653400 |
| C | 4.79242800   | -2.79478300 | -1.36522200 |
| C | 6.61073900   | -1.59494000 | -0.31903600 |
| C | 5.57858400   | -3.95066700 | -1.44504700 |
| C | 7.38509800   | -2.78417300 | -0.41784800 |
| C | 6.89113200   | -3.96066100 | -0.98582200 |
| H | 7.50829400   | -4.84932200 | -1.06211200 |
| C | 7.44924100   | -0.61476500 | 0.35530500  |
| C | 8.69744200   | -1.24636900 | 0.60216900  |
| N | 8.64989000   | -2.55729800 | 0.12547300  |
| C | 9.74112300   | -0.60036700 | 1.27076200  |
| C | 7.26180500   | 0.69959700  | 0.81252900  |
| C | 9.52654200   | 0.70557600  | 1.69993400  |
| C | 8.29767700   | 1.34882400  | 1.47643400  |
| H | 5.15973000   | -4.84943400 | -1.88880700 |
| H | 3.78312100   | -2.80842200 | -1.76492100 |
| H | 10.68234400  | -1.10608100 | 1.45927900  |
| H | 6.31432900   | 1.20245900  | 0.66053800  |
| H | 8.15247200   | 2.36567600  | 1.83024900  |
| H | 10.32149800  | 1.23047800  | 2.22278700  |
| C | 9.70244100   | -3.51125200 | 0.21477400  |
| C | 10.93391200  | -3.25217500 | -0.39900800 |
| C | 9.51164700   | -4.70637100 | 0.91902100  |
| C | 11.96907200  | -4.18182800 | -0.30031100 |
| H | 11.06795200  | -2.32918900 | -0.95474000 |
| C | 10.54548500  | -5.63951200 | 0.99688100  |
| H | 8.55978100   | -4.89147100 | 1.40715200  |
| C | 11.77687600  | -5.37885600 | 0.39237800  |
| H | 12.92312900  | -3.97434900 | -0.77699000 |
| H | 10.39097300  | -6.56605900 | 1.54289300  |
| H | 12.58244000  | -6.10442000 | 0.46115000  |

|   |             |             |             |
|---|-------------|-------------|-------------|
| H | 5.66772800  | 1.12100900  | -1.76513400 |
| C | -5.83883700 | -3.38490800 | -2.98512700 |
| H | -5.83279500 | -3.57024900 | -4.05554500 |

### **H-3**

|   |             |             |             |
|---|-------------|-------------|-------------|
| C | -0.76401900 | -0.37124900 | 0.13886300  |
| C | -1.24707500 | 0.94299700  | 0.17124200  |
| C | -0.37348100 | 2.04200900  | 0.16597600  |
| C | 1.01027500  | 1.80323300  | 0.12887600  |
| C | 1.52130600  | 0.49982200  | 0.10392900  |
| C | 0.62298000  | -0.57755100 | 0.10597500  |
| H | -2.31948700 | 1.11226100  | 0.19073800  |
| H | 1.69523000  | 2.64250600  | 0.06639300  |
| H | 1.01012500  | -1.59124900 | 0.12562900  |
| C | 2.98845900  | 0.26251000  | 0.07681300  |
| C | 3.53476900  | -0.76425900 | -0.70686300 |
| C | 3.84812300  | 1.07236400  | 0.84019400  |
| C | 4.91294300  | -0.97549600 | -0.73020700 |
| C | 5.22825000  | 0.86847700  | 0.82321800  |
| H | 3.43247600  | 1.85037800  | 1.47507100  |
| C | 5.77523900  | -0.16449700 | 0.03167200  |
| C | 5.47613200  | -2.05910900 | -1.57255100 |
| C | 7.19661400  | -0.36799800 | 0.02244900  |
| C | 7.48740100  | 1.52583200  | 1.63021700  |
| H | 5.72822700  | 2.39007500  | 2.15382900  |
| C | 7.73819100  | -1.40042900 | -0.77432200 |
| C | 8.05461100  | 0.44288600  | 0.79248500  |
| H | 7.23302500  | -2.92465500 | -2.09914900 |
| C | 9.12076400  | -1.60688900 | -0.79082600 |
| C | 9.43444600  | 0.22930300  | 0.77008700  |
| H | 9.54041300  | -2.40091200 | -1.40334600 |
| C | 9.95626900  | -0.79348100 | -0.02133000 |
| H | 10.07196900 | 0.86711900  | 1.37197400  |
| H | 11.02828300 | -0.96576500 | -0.04414200 |
| O | 8.14900100  | 2.27928000  | 2.33259700  |
| H | 2.90745100  | -1.39455000 | -1.32730400 |
| O | 4.80888000  | -2.80967300 | -2.27174000 |
| N | 6.10056900  | 1.64708400  | 1.57372200  |
| N | 6.86210600  | -2.17964200 | -1.52041400 |
| C | -1.70127300 | -1.52495300 | 0.15933800  |
| C | -1.43393000 | -2.67571700 | -0.59630800 |
| C | -2.87099400 | -1.47311900 | 0.93825100  |
| C | -2.31830800 | -3.75343700 | -0.57546700 |
| H | -0.55630900 | -2.74439700 | -1.22932900 |
| C | -3.76275400 | -2.54600700 | 0.96403900  |
| H | -3.07458800 | -0.59882600 | 1.55053900  |
| C | -3.49026400 | -3.70330100 | 0.20261800  |
| C | -2.02501800 | -4.96005600 | -1.38681300 |
| C | -4.41110700 | -4.80424900 | 0.23931900  |
| C | -5.86826900 | -3.54281100 | 1.83401000  |
| H | -5.13763400 | -1.70292000 | 2.28047900  |
| C | -4.13620700 | -5.95680400 | -0.52876600 |
| C | -5.57887700 | -4.75174100 | 1.02648300  |
| H | -2.76220400 | -6.79115900 | -1.85164500 |
| C | -5.02678500 | -7.03394800 | -0.50088200 |
| C | -6.46269200 | -5.83257200 | 1.04883300  |
| H | -4.81795300 | -7.92223700 | -1.09176200 |

|   |             |             |             |
|---|-------------|-------------|-------------|
| C | -6.17993300 | -6.96442600 | 0.28479900  |
| H | -7.35398500 | -5.76605100 | 1.66258200  |
| H | -6.86301000 | -7.80865700 | 0.29629000  |
| N | -4.92079900 | -2.52649900 | 1.73072300  |
| N | -2.97451100 | -5.97328300 | -1.29175500 |
| O | -6.85173900 | -3.40671300 | 2.54976000  |
| O | -1.03617300 | -5.09386900 | -2.09576500 |
| C | -0.88025300 | 3.41889400  | 0.18528100  |
| C | -0.22282400 | 4.56079200  | 0.61465500  |
| S | -2.48874600 | 3.79908200  | -0.37492300 |
| C | -1.00207900 | 5.72557800  | 0.50253000  |
| H | 0.78063100  | 4.54827300  | 1.02379100  |
| C | -2.27522500 | 5.50507600  | -0.01195100 |
| H | -0.66241200 | 6.71316900  | 0.79763300  |
| C | -3.24023200 | 6.54048600  | -0.20617500 |
| H | -2.88166300 | 7.53021600  | 0.06393300  |
| C | -4.52655200 | 6.48795200  | -0.66853700 |
| C | -5.36387000 | 7.70718800  | -0.79071700 |
| C | -5.16268100 | 5.27137600  | -1.05994500 |
| N | -5.65569400 | 4.26278100  | -1.36873300 |
| O | -6.50872800 | 7.71729200  | -1.18892600 |
| O | -4.71139400 | 8.83639000  | -0.40514500 |
| H | -5.35152500 | 9.56126800  | -0.52743300 |

#### H-4

|   |             |             |             |
|---|-------------|-------------|-------------|
| C | -0.99039900 | -2.81957000 | -0.62880000 |
| C | -0.49087200 | -3.96815100 | -1.22385700 |
| S | -2.61312500 | -3.07568900 | -0.04251300 |
| C | -1.40382800 | -5.03646900 | -1.21905900 |
| H | 0.49174600  | -4.01624600 | -1.67862400 |
| C | -2.62481900 | -4.73583200 | -0.62153300 |
| H | -1.19937200 | -6.01080900 | -1.65162700 |
| C | -3.70152300 | -5.66414800 | -0.51084800 |
| H | -3.48031300 | -6.64404100 | -0.92575000 |
| C | -4.95429600 | -5.52455400 | 0.02560100  |
| C | -5.41872500 | -4.30817900 | 0.61068900  |
| N | -5.77211600 | -3.30331300 | 1.08129500  |
| C | -5.92883300 | -6.64079100 | 0.03306300  |
| O | -7.05034200 | -6.57506300 | 0.49057500  |
| O | -5.43834700 | -7.77656500 | -0.53492700 |
| H | -6.16030900 | -8.42824600 | -0.47209600 |
| C | -1.20888200 | 2.14493400  | -0.15614300 |
| C | -0.84001800 | 3.45306500  | -0.42387500 |
| C | -3.03231000 | 3.43950600  | 0.19815000  |
| C | -1.97599300 | 4.28620300  | -0.20921500 |
| N | -2.55391100 | 2.14864100  | 0.19773900  |
| H | -3.03534600 | 1.36147400  | 0.60480300  |
| H | 0.13109700  | 3.76645700  | -0.78214900 |
| C | -4.32466300 | 3.93015400  | 0.52133200  |
| C | -2.21941600 | 5.69127600  | -0.32166500 |
| C | -3.50193500 | 6.19150900  | -0.00465100 |
| C | -4.53849300 | 5.32410100  | 0.41446800  |
| C | -1.42007000 | 6.81591900  | -0.70245800 |
| C | -5.56001400 | 3.34735600  | 0.95756500  |
| C | -6.46450700 | 4.36869600  | 1.10104300  |
| C | -2.20994700 | 7.93556800  | -0.61110100 |
| H | -1.98336500 | 8.97308900  | -0.81132000 |

|   |             |             |             |
|---|-------------|-------------|-------------|
| H | -7.49991900 | 4.34910900  | 1.40917200  |
| H | -0.38283200 | 6.79922500  | -1.00774000 |
| H | -5.76210700 | 2.30061500  | 1.14024400  |
| N | -3.47137200 | 7.56188200  | -0.18723100 |
| N | -5.85024400 | 5.56438900  | 0.77288500  |
| H | -6.30094400 | 6.46450300  | 0.80115200  |
| H | -4.24031900 | 8.19730600  | -0.05001400 |
| C | 3.19106600  | -0.16146600 | -0.13232100 |
| C | 4.06264900  | 0.86426700  | -0.45344800 |
| C | 5.39083400  | 0.41484300  | -0.19194400 |
| C | 5.28633400  | -0.90575100 | 0.29920900  |
| N | 3.95046300  | -1.24572900 | 0.29672300  |
| H | 3.56510800  | -2.04242700 | 0.78025000  |
| C | 6.68736400  | 1.00330600  | -0.32521800 |
| C | 6.41847500  | -1.66782100 | 0.69012600  |
| C | 7.68959100  | -1.06048100 | 0.56266400  |
| C | 7.82251400  | 0.25447600  | 0.05797900  |
| C | 6.63380800  | -2.98350700 | 1.21837800  |
| C | 7.16522700  | 2.27251900  | -0.78301200 |
| H | 9.89356100  | 0.78388900  | 0.00983700  |
| H | 6.56735000  | 3.09471300  | -1.15148400 |
| C | 8.53376000  | 2.26461700  | -0.67103000 |
| H | 9.26219800  | 3.02599500  | -0.91090800 |
| C | 7.98585800  | -3.13790700 | 1.39386400  |
| H | 8.55273800  | -3.97814200 | 1.76820700  |
| H | 5.88371800  | -3.73040100 | 1.44091900  |
| N | 8.93609700  | 1.04451200  | -0.16109600 |
| N | 8.62636800  | -1.97795100 | 0.99710500  |
| H | 9.62240100  | -1.83411200 | 1.03469200  |
| C | -0.32563900 | -1.52356200 | -0.45788700 |
| C | 1.07429700  | -1.46219800 | -0.37966800 |
| C | 1.73474200  | -0.23109100 | -0.22819600 |
| C | 0.96414200  | 0.93905200  | -0.14398800 |
| C | -0.43663200 | 0.90918000  | -0.23530000 |
| C | -1.06968400 | -0.33580100 | -0.39460200 |
| H | 1.65128300  | -2.37929400 | -0.44525400 |
| H | 1.46208500  | 1.88560000  | 0.03741100  |
| H | -2.14579400 | -0.37698500 | -0.53392700 |
| H | 3.77487400  | 1.81615300  | -0.87857700 |

### **H-5**

|   |             |             |             |
|---|-------------|-------------|-------------|
| C | -0.74515300 | 1.33562300  | 0.11842100  |
| C | 0.41660600  | 0.56319200  | 0.23970700  |
| C | 0.35331200  | -0.83776200 | 0.27890100  |
| C | -0.89951600 | -1.46585500 | 0.19631600  |
| C | -2.07618000 | -0.71685500 | 0.08302700  |
| C | -1.98268600 | 0.68204200  | 0.03252300  |
| H | 1.36781600  | 1.07925500  | 0.30799400  |
| H | -0.97819500 | -2.54614900 | 0.18631000  |
| H | -2.87967400 | 1.26745800  | -0.13709100 |
| C | 1.56755900  | -1.65122800 | 0.41076000  |
| C | 1.66994500  | -2.95399600 | 0.87482900  |
| S | 3.13223400  | -1.02447100 | -0.04122500 |
| C | 2.98750200  | -3.44076700 | 0.87378400  |
| H | 0.81843500  | -3.52428500 | 1.22668900  |
| C | 3.92789800  | -2.52484200 | 0.41107700  |
| H | 3.26746800  | -4.43390200 | 1.21049500  |

|   |             |             |             |
|---|-------------|-------------|-------------|
| C | 5.32451400  | -2.80467500 | 0.32924200  |
| H | 5.58834100  | -3.80872800 | 0.65088500  |
| C | 6.37461300  | -2.02771800 | -0.08144200 |
| C | 6.22041100  | -0.68287500 | -0.53437500 |
| N | 6.07207700  | 0.41289300  | -0.89925100 |
| C | 7.76681900  | -2.53688300 | -0.08094800 |
| O | 8.73624600  | -1.89665700 | -0.42941900 |
| O | 7.86131300  | -3.82211800 | 0.35794600  |
| H | 8.81015700  | -4.04010300 | 0.31289800  |
| C | -0.63290000 | 2.81945700  | 0.06936300  |
| C | -1.73616000 | 3.63710600  | 0.42875300  |
| C | 0.73084800  | 4.60539900  | -0.37410900 |
| C | -1.59291100 | 5.02409600  | 0.35976300  |
| H | -2.65726100 | 3.19149500  | 0.78240400  |
| C | -3.38542000 | -1.42029700 | -0.00988200 |
| C | -4.46634200 | -3.37164200 | -0.53253300 |
| C | -5.79447500 | -1.43809100 | 0.24685800  |
| H | -4.55173400 | 0.25847000  | 0.74172200  |
| N | -0.34785700 | 5.39517400  | -0.07418900 |
| N | 0.58798500  | 3.29220100  | -0.30966600 |
| C | 1.77431900  | 5.54559400  | -0.68407300 |
| C | -0.12101200 | 6.72904500  | -0.12861800 |
| C | -2.25570700 | 6.26946800  | 0.59363000  |
| C | -1.35418500 | 7.30382400  | 0.29459200  |
| C | -7.20493500 | -1.33892600 | 0.46381400  |
| C | -6.75700900 | -3.45340800 | -0.32217100 |
| C | -4.90380100 | -4.69312700 | -0.89361500 |
| C | -7.78524500 | -2.56865300 | 0.11560200  |
| C | 1.25298200  | 6.83069700  | -0.53125700 |
| C | -6.29287700 | -4.73722700 | -0.76191300 |
| H | 2.77965000  | 5.28318400  | -0.98076700 |
| H | 1.79893600  | 7.75188400  | -0.68746700 |
| H | -1.56750200 | 8.36159900  | 0.37880200  |
| H | -3.27428800 | 6.38997000  | 0.93522200  |
| H | -7.72934000 | -0.46595400 | 0.82652700  |
| H | -8.84072800 | -2.80036900 | 0.17647500  |
| H | -6.91481700 | -5.60099100 | -0.95739500 |
| H | -4.25711700 | -5.49833100 | -1.21140000 |
| C | -4.58409800 | -0.75212800 | 0.35512700  |
| N | -5.62728700 | -2.71243000 | -0.22644900 |
| N | -3.32158300 | -2.71559300 | -0.43013900 |

### **H-6**

|   |             |             |             |
|---|-------------|-------------|-------------|
| C | 1.20677800  | 0.75869700  | -0.24722700 |
| C | 0.36595700  | 1.88113100  | -0.25246700 |
| C | -1.02322900 | 1.69411300  | -0.17892800 |
| C | -1.57269700 | 0.40889500  | -0.09313200 |
| C | -0.70895900 | -0.69683300 | -0.10207400 |
| C | 0.68228100  | -0.53901600 | -0.18278000 |
| H | 2.28294000  | 0.87099400  | -0.31460700 |
| H | -1.69554700 | 2.54310900  | -0.15845200 |
| H | -1.12837300 | -1.69516600 | -0.04543500 |
| C | 0.91756900  | 3.23847600  | -0.33281200 |
| C | 0.28340600  | 4.39121300  | -0.77083000 |
| S | 2.55761300  | 3.57530800  | 0.15786700  |
| C | 1.10605600  | 5.52898600  | -0.72036200 |
| H | -0.73511000 | 4.40010000  | -1.14080600 |

|   |             |             |             |
|---|-------------|-------------|-------------|
| C | 2.38971800  | 5.27767000  | -0.24407400 |
| H | 0.79079100  | 6.51977200  | -1.03191700 |
| C | 3.39419400  | 6.28219500  | -0.11380300 |
| H | 3.06151300  | 7.27458200  | -0.40653600 |
| C | 4.69317000  | 6.20289700  | 0.31286600  |
| C | 5.30399900  | 4.98237100  | 0.73135000  |
| N | 5.78175300  | 3.97478800  | 1.06673300  |
| C | 5.56994400  | 7.39684200  | 0.36664200  |
| O | 6.72663600  | 7.38789500  | 0.73160000  |
| O | 4.94278700  | 8.53398600  | -0.04149400 |
| H | 5.61114000  | 9.23894200  | 0.03728200  |
| C | 1.61093500  | -1.69838300 | -0.20602800 |
| C | 1.16584300  | -2.99225300 | -0.57962900 |
| C | 2.07576800  | -4.04522200 | -0.57694300 |
| H | 0.14189400  | -3.15501900 | -0.89180800 |
| C | 3.76503700  | -2.40929400 | 0.13219300  |
| C | -3.04568800 | 0.25010000  | 0.01563000  |
| C | -5.09960500 | 1.18427200  | -0.39170800 |
| C | -4.99533700 | -1.02047200 | 0.68515400  |
| H | -2.97407100 | -1.67762900 | 1.02718900  |
| N | 2.90143600  | -1.41591000 | 0.13164600  |
| N | 3.34067100  | -3.67462000 | -0.19736100 |
| N | -5.66083700 | 0.05390300  | 0.15188800  |
| C | 5.49774300  | -3.97346400 | 0.20123700  |
| C | 5.17611900  | -2.57764900 | 0.40391300  |
| C | 4.28660200  | -4.64872700 | -0.18940200 |
| C | 3.58728300  | -5.82711400 | -0.60424000 |
| C | 2.20436700  | -5.45554500 | -0.84908300 |
| C | -6.24157300 | 1.99552600  | -0.75299600 |
| C | -7.01772800 | 0.02002800  | 0.20767300  |
| C | -6.05664200 | -1.88040000 | 1.14871200  |
| C | -7.31741500 | -1.22627700 | 0.84672500  |
| C | -7.43418100 | 1.26748400  | -0.37603100 |
| C | -3.61114000 | -0.90812400 | 0.60966600  |
| N | -3.78760000 | 1.28825500  | -0.46457500 |
| C | 6.81938700  | -4.40585700 | 0.39762600  |
| C | 6.15965000  | -1.66016300 | 0.79162200  |
| C | 3.98345200  | -7.16418100 | -0.79860700 |
| C | 1.27445200  | -6.41805300 | -1.27205500 |
| H | 0.23963800  | -6.14072100 | -1.45549800 |
| H | 5.90451300  | -0.61493900 | 0.93963000  |
| H | 5.01204600  | -7.46508000 | -0.62233200 |
| C | 3.04191400  | -8.08970000 | -1.21804800 |
| C | 1.69644000  | -7.72514400 | -1.45432000 |
| H | 3.34281000  | -9.12288200 | -1.36989500 |
| H | 0.98887700  | -8.48073600 | -1.78278000 |
| C | 7.77778300  | -3.47702600 | 0.78182300  |
| C | 7.45717500  | -2.11708700 | 0.97838200  |
| H | 7.08905100  | -5.44792300 | 0.25194300  |
| H | 8.80239400  | -3.80544400 | 0.93518300  |
| H | 8.23556900  | -1.42198600 | 1.27845200  |
| C | -6.03930300 | -3.13213900 | 1.78305200  |
| C | -8.52255200 | -1.86211600 | 1.19993000  |
| C | -6.33027900 | 3.25692000  | -1.35350800 |
| C | -8.69258700 | 1.84406800  | -0.61745400 |
| H | -9.47763200 | -1.39193700 | 0.98463900  |



|   |             |             |             |
|---|-------------|-------------|-------------|
| H | -5.09589000 | -3.62198400 | 2.00944800  |
| C | -7.24291700 | -3.73152600 | 2.11813400  |
| C | -8.47185100 | -3.09684700 | 1.82656100  |
| H | -7.24597700 | -4.69928400 | 2.61083400  |
| H | -9.39935500 | -3.59182500 | 2.10173700  |
| C | -8.75342000 | 3.09652000  | -1.21296000 |
| C | -7.58671300 | 3.80092500  | -1.58024300 |
| H | -5.42679400 | 3.79083100  | -1.63318000 |
| H | -7.67732800 | 4.77823600  | -2.04514600 |
| H | -9.72406600 | 3.54721000  | -1.40222800 |
| H | -9.60344800 | 1.31957900  | -0.34363700 |

**H-7**

|   |             |             |             |
|---|-------------|-------------|-------------|
| C | 1.24997200  | 1.68233900  | -0.21749600 |
| C | 0.21492700  | 2.62736300  | -0.18127300 |
| C | -1.11428700 | 2.18183000  | -0.11334100 |
| C | -1.41252900 | 0.81345300  | -0.07313700 |
| C | -0.35705800 | -0.11057900 | -0.12061800 |
| C | 0.97996900  | 0.30725800  | -0.19556600 |
| H | 2.28550000  | 1.99575200  | -0.28256800 |
| H | -1.93377500 | 2.88820100  | -0.06192700 |
| H | -0.58333100 | -1.17080600 | -0.10030500 |
| C | 0.50888300  | 4.06458700  | -0.20882900 |
| C | -0.33342000 | 5.10413000  | -0.57347300 |
| S | 2.07843200  | 4.66735700  | 0.25761800  |
| C | 0.27582900  | 6.36724800  | -0.48652200 |
| H | -1.34937500 | 4.94821400  | -0.91673800 |
| C | 1.59898300  | 6.32807900  | -0.05542700 |
| H | -0.22029800 | 7.29865600  | -0.74043600 |
| C | 2.41617800  | 7.48692700  | 0.09888100  |
| H | 1.90466000  | 8.41795400  | -0.13074900 |
| C | 3.72478900  | 7.61752700  | 0.48205500  |
| C | 4.55660000  | 6.50567100  | 0.81407200  |
| N | 5.21829500  | 5.58453700  | 1.07815600  |
| C | 4.38105100  | 8.94340300  | 0.57430600  |
| O | 5.53498000  | 9.12086500  | 0.90332700  |
| O | 3.54957100  | 9.97040900  | 0.24773500  |
| H | 4.08705500  | 10.77765100 | 0.34444000  |
| C | 2.11232400  | -0.65001700 | -0.25325200 |
| C | 1.92497200  | -2.00868200 | -0.61527200 |
| C | 3.02531600  | -2.85842300 | -0.64230100 |
| H | 0.94578900  | -2.37760500 | -0.89381500 |
| C | 4.37485400  | -0.92463900 | 0.01753600  |
| C | -2.82727200 | 0.37804800  | 0.03098000  |
| C | -5.02543100 | 0.92728200  | -0.32785500 |
| C | -4.50325800 | -1.25832300 | 0.64526200  |
| H | -2.39541300 | -1.54823800 | 0.95373300  |
| N | 3.33459300  | -0.12261000 | 0.04622000  |
| N | 4.20657800  | -2.25049600 | -0.30401300 |
| N | -5.36792900 | -0.30837300 | 0.16621300  |
| C | 6.39681300  | -2.12165400 | 0.03459500  |
| C | 5.80147900  | -0.80363600 | 0.25046600  |
| C | 5.32700100  | -3.01948200 | -0.32335400 |
| C | 4.86665600  | -4.31889200 | -0.71694500 |
| C | 3.41674400  | -4.22375900 | -0.92132300 |
| C | -6.30308400 | 1.53268400  | -0.65417600 |
| C | -6.69540900 | -0.59771100 | 0.22194200  |

|   |              |             |             |
|---|--------------|-------------|-------------|
| C | -5.37906400  | -2.32803800 | 1.07485500  |
| C | -6.75756900  | -1.90694100 | 0.80407500  |
| C | -7.34910800  | 0.57156400  | -0.30487400 |
| C | -3.16575400  | -0.88973400 | 0.57254600  |
| N | -3.75836600  | 1.27717800  | -0.39918100 |
| C | 7.76499700   | -2.28128100 | 0.19127300  |
| C | 6.57465300   | 0.28338100  | 0.60665200  |
| C | 5.50461000   | -5.53715300 | -0.92001300 |
| C | 2.68422500   | -5.33203900 | -1.31175800 |
| H | 1.60951200   | -5.26383200 | -1.46455500 |
| H | 6.11914000   | 1.25773300  | 0.76305100  |
| H | 6.57740200   | -5.63292300 | -0.77507600 |
| C | 4.76198200   | -6.66607900 | -1.31845600 |
| C | 3.33207300   | -6.56625400 | -1.51834800 |
| C | 8.56700000   | -1.17610900 | 0.55554700  |
| C | 7.96837400   | 0.12294000  | 0.76622800  |
| H | 8.23620400   | -3.24853800 | 0.03734000  |
| C | -5.11563400  | -3.56231400 | 1.64391200  |
| C | -7.80605500  | -2.76029000 | 1.12593200  |
| C | -6.61685700  | 2.76523100  | -1.19200600 |
| C | -8.67821500  | 0.90821500  | -0.51557300 |
| H | -8.83619800  | -2.47125200 | 0.93536100  |
| H | -4.09406900  | -3.87609700 | 1.84590000  |
| C | -6.17942000  | -4.42695900 | 1.97100700  |
| C | -7.54171900  | -4.01673100 | 1.70683200  |
| C | -9.00931900  | 2.16683400  | -1.06356000 |
| C | -7.96853300  | 3.10964100  | -1.40831000 |
| H | -5.82979900  | 3.46920200  | -1.44936900 |
| H | -9.47614800  | 0.21431500  | -0.26460000 |
| C | -10.36521400 | 2.54590900  | -1.29364100 |
| C | -8.33834000  | 4.37027100  | -1.96092700 |
| C | -5.94838200  | -5.70529200 | 2.56042600  |
| C | -8.59541400  | -4.91705300 | 2.05045300  |
| C | 2.61192600   | -7.72954000 | -1.92267500 |
| C | 5.38626700   | -7.93200000 | -1.53619800 |
| C | 9.97716900   | -1.30308100 | 0.72523400  |
| C | 8.80496200   | 1.21735700  | 1.13145500  |
| C | 4.65698900   | -9.02711400 | -1.92456500 |
| H | 5.15250700   | -9.98086000 | -2.08490000 |
| C | 3.25119400   | -8.92694200 | -2.12119000 |
| H | 2.68821200   | -9.80345600 | -2.42937800 |
| C | -6.99040300  | -6.54016100 | 2.87544800  |
| H | -6.79778400  | -7.51049300 | 3.32427200  |
| C | -8.33050100  | -6.13865400 | 2.61602500  |
| H | -9.14771000  | -6.80836000 | 2.86996800  |
| C | -10.68038400 | 3.77087700  | -1.82792500 |
| H | -11.72014800 | 4.03907800  | -1.99486000 |
| C | -9.65600700  | 4.69625600  | -2.16673000 |
| H | -9.92159200  | 5.66135200  | -2.58887400 |
| C | 10.15960600  | 1.05205900  | 1.28439000  |
| H | 10.78492500  | 1.89554700  | 1.56278000  |
| C | 10.75007400  | -0.22402300 | 1.07858500  |
| H | 11.82321800  | -0.34303200 | 1.20249800  |
| H | 1.53769800   | -7.64673200 | -2.07191300 |
| H | 6.46049800   | -8.01086900 | -1.38693400 |
| H | 10.43261000  | -2.27806900 | 0.56812800  |

|   |              |             |             |
|---|--------------|-------------|-------------|
| H | 8.34547800   | 2.19058000  | 1.28621100  |
| H | -9.62053600  | -4.61243900 | 1.85355600  |
| H | -4.92188300  | -6.00634900 | 2.75692300  |
| H | -11.15113300 | 1.83999800  | -1.03565500 |
| H | -7.54953800  | 5.07344700  | -2.21805400 |

## Cartesian coordinates of the best dyes interacted to the TiO<sub>2</sub> cluster

### NS-3-TiO<sub>2</sub>

|   |             |             |             |
|---|-------------|-------------|-------------|
| C | 7.33806700  | -0.49132700 | -0.32889900 |
| C | 7.51240900  | 0.89943500  | -0.24144000 |
| C | 8.78964400  | 1.46563600  | -0.12183300 |
| C | 9.89727500  | 0.60224000  | -0.09570600 |
| C | 9.75855700  | -0.79361400 | -0.16752100 |
| C | 8.46727700  | -1.32691600 | -0.28172000 |
| H | 6.64488900  | 1.55214600  | -0.26336100 |
| H | 10.89494600 | 1.02909500  | -0.06658300 |
| H | 8.33730000  | -2.40404500 | -0.28069100 |
| C | 6.00196400  | -1.08197200 | -0.44742000 |
| C | 5.66592900  | -2.32467700 | -0.97178000 |
| S | 4.58107800  | -0.23149500 | 0.09798200  |
| C | 4.28834300  | -2.58452500 | -0.94432600 |
| H | 6.39888800  | -3.00544800 | -1.38779500 |
| C | 3.52839600  | -1.54920700 | -0.39963700 |
| H | 3.83333900  | -3.49553500 | -1.32005300 |
| C | 2.11385200  | -1.59156700 | -0.27987800 |
| H | 1.66059800  | -2.51395700 | -0.63633000 |
| C | 1.22117500  | -0.66749500 | 0.20800800  |
| C | -0.21274200 | -0.97534000 | 0.21474100  |
| O | -1.08338100 | -0.19237000 | 0.64982600  |
| O | -0.60878200 | -2.14563300 | -0.26466800 |
| C | 1.60064100  | 0.60873700  | 0.72089000  |
| C | 8.96508500  | 2.93519800  | -0.04600600 |
| C | 8.13246400  | 3.81603900  | -0.75573000 |
| C | 9.97425000  | 3.51549900  | 0.73959600  |
| C | 8.28867300  | 5.19473400  | -0.68702500 |
| H | 7.35877200  | 3.41594900  | -1.40563500 |
| C | 10.14470800 | 4.89190500  | 0.82258500  |
| H | 10.63106300 | 2.87653800  | 1.32404800  |
| C | 9.29618100  | 5.77685900  | 0.11711300  |
| H | 7.62548700  | 5.81925300  | -1.27333500 |
| H | 10.93701400 | 5.27788400  | 1.45285000  |
| N | 9.44085600  | 7.15278200  | 0.21616700  |
| C | 10.60716700 | 7.70336600  | 0.88424400  |
| C | 8.65719500  | 8.01982600  | -0.64657000 |
| H | 10.54744400 | 8.79332300  | 0.86768500  |
| H | 10.64608100 | 7.39077600  | 1.93525200  |
| H | 11.55325000 | 7.40333900  | 0.40589800  |
| H | 8.87571200  | 9.06087600  | -0.40065500 |
| H | 8.87227700  | 7.86647900  | -1.71637600 |
| H | 7.58296500  | 7.86221600  | -0.49157700 |
| N | 1.92433200  | 1.64825900  | 1.13430600  |
| C | 10.94508700 | -1.68105400 | -0.12730200 |
| C | 11.00986300 | -2.86014400 | -0.88730900 |
| C | 12.06221700 | -1.38214200 | 0.66948300  |
| C | 12.11785200 | -3.69830200 | -0.85673500 |
| H | 10.18550100 | -3.11555500 | -1.54816100 |
| C | 13.17832300 | -2.20858900 | 0.71480700  |
| H | 12.05208200 | -0.49041500 | 1.29069500  |
| C | 13.23548900 | -3.40199000 | -0.04219700 |
| H | 12.11470900 | -4.58224900 | -1.48319400 |

|    |             |             |             |
|----|-------------|-------------|-------------|
| H  | 14.00550600 | -1.92531700 | 1.35465100  |
| N  | 14.33477100 | -4.24723500 | 0.01820500  |
| C  | 14.43069700 | -5.36177700 | -0.90856600 |
| C  | 15.54221100 | -3.80063300 | 0.69181200  |
| H  | 15.34952500 | -3.59317300 | 1.75154900  |
| H  | 16.29198400 | -4.59276400 | 0.64366900  |
| H  | 15.97163600 | -2.89185900 | 0.24043100  |
| H  | 14.46763500 | -5.04124800 | -1.96233500 |
| H  | 15.33815700 | -5.92911400 | -0.69247700 |
| H  | 13.57983200 | -6.04388500 | -0.79220300 |
| Ti | -6.13647800 | 2.15322200  | -1.07727200 |
| Ti | -8.22584700 | 2.72172200  | 0.82750300  |
| Ti | -6.33568500 | 0.64273500  | 1.82957200  |
| Ti | -8.88907600 | 1.30037100  | -1.50985400 |
| Ti | -4.29966400 | -1.71040600 | 2.18480300  |
| Ti | -4.09468900 | 0.35454900  | -0.90427100 |
| Ti | -2.50648800 | -1.96232600 | -0.00359700 |
| Ti | -7.20404000 | -1.10569700 | -0.88562600 |
| Ti | -5.25676600 | -3.76135500 | -0.11293100 |
| O  | -6.95232900 | 3.56433300  | -0.05441000 |
| O  | -4.47088400 | 2.10733000  | -1.64260600 |
| O  | -7.55422100 | 1.94842800  | 2.34829100  |
| O  | -8.77129000 | -0.51520200 | -1.69195400 |
| O  | -9.68075400 | 2.46672800  | -0.28994500 |
| O  | -7.59041300 | 2.10407100  | -2.37505900 |
| O  | -2.65476000 | -2.28905300 | 1.92002500  |
| O  | -5.26042800 | 1.43278800  | 0.61769600  |
| O  | -2.81643000 | -0.62254500 | -1.50700700 |
| O  | -4.12191600 | -0.87237300 | 0.55235900  |
| O  | -3.44344300 | -3.31934700 | -0.59446100 |
| O  | -5.28974000 | -0.23908800 | 2.96016700  |
| O  | -7.15648100 | -1.02321300 | 1.07949700  |
| O  | -5.42363200 | -2.99576300 | 1.67872800  |
| O  | -5.83028500 | -0.05147000 | -1.52561900 |
| O  | -5.54693100 | -5.35157100 | -0.14395500 |
| O  | -6.67849300 | -2.74271600 | -1.03306500 |
| O  | -7.64189900 | 1.13209800  | -0.07238500 |
| H  | -6.81898400 | -1.87061100 | 1.47663000  |

#### NS-4-TiO<sub>2</sub>

|    |              |             |             |
|----|--------------|-------------|-------------|
| Ti | -7.93377400  | -1.33455900 | -2.33699300 |
| Ti | -10.28214900 | 0.09168900  | -1.61025900 |
| Ti | -7.89993900  | 1.39847600  | -0.36773900 |
| Ti | -9.64033800  | -2.28250400 | -0.19259900 |
| Ti | -5.48028200  | 2.18279900  | 1.00942500  |
| Ti | -5.55060000  | -0.67111200 | -1.12725300 |
| Ti | -2.88478400  | 0.54055900  | 0.39202800  |
| Ti | -7.26722100  | -1.07772400 | 1.39463000  |
| Ti | -4.82584700  | 0.11937800  | 3.22320400  |
| O  | -9.46191400  | -0.47038700 | -3.08705100 |
| O  | -6.23489700  | -1.64299400 | -2.67010100 |
| O  | -9.62456900  | 1.67690100  | -1.06170600 |
| O  | -8.75336800  | -2.27826700 | 1.35499100  |
| O  | -11.12844100 | -1.27938300 | -0.71145700 |
| O  | -8.77811100  | -2.88925800 | -1.64353700 |
| O  | -3.85739700  | 2.15153000  | 0.28984100  |

|   |             |             |             |
|---|-------------|-------------|-------------|
| O | -7.01852700 | 0.49307800  | -1.80130200 |
| O | -3.81137800 | -0.33314600 | -0.98620800 |
| O | -6.12475100 | 0.50152700  | 0.46337700  |
| O | -3.42517300 | -0.11740400 | 1.91017400  |
| O | -7.03821400 | 2.86005900  | 0.14024200  |
| O | -8.42103300 | 0.63079500  | 1.44321900  |
| O | -5.47280000 | 1.88107500  | 2.73785200  |
| O | -6.28726500 | -1.87228000 | 0.01700200  |
| O | -4.30381200 | 0.01300200  | 4.75054100  |
| O | -6.35209000 | -1.06027200 | 2.85357000  |
| O | -8.75655300 | -0.66540100 | -0.65820200 |
| H | -8.28759500 | 1.20165300  | 2.22067900  |
| C | 6.99415000  | -0.52879800 | -0.36496400 |
| C | 7.45566400  | 0.79773200  | -0.39593900 |
| C | 8.82436400  | 1.08676300  | -0.32459000 |
| C | 9.73003800  | 0.01941900  | -0.22853600 |
| C | 9.30344300  | -1.31902500 | -0.18709400 |
| C | 7.92642800  | -1.57449400 | -0.25269800 |
| H | 6.74494500  | 1.61505600  | -0.47298800 |
| H | 10.79446900 | 0.23224800  | -0.23236300 |
| H | 7.57453100  | -2.59680100 | -0.16258200 |
| C | 5.56248700  | -0.83465900 | -0.42722200 |
| C | 4.96416600  | -2.02084000 | -0.83969300 |
| S | 4.36362400  | 0.33727700  | 0.04725400  |
| C | 3.56484900  | -1.98396700 | -0.78388700 |
| H | 5.53029200  | -2.87257800 | -1.19694900 |
| C | 3.04901200  | -0.76906000 | -0.32855400 |
| H | 2.92200300  | -2.80836800 | -1.07559600 |
| C | 1.66257500  | -0.50456400 | -0.19669900 |
| H | 1.01516300  | -1.33697000 | -0.46583900 |
| C | 0.99446900  | 0.62644000  | 0.21428700  |
| C | 1.64182500  | 1.83542600  | 0.60631200  |
| N | 2.18925400  | 2.81492500  | 0.91741700  |
| C | -0.46403200 | 0.59982300  | 0.25282400  |
| O | -1.15691700 | 1.61218000  | 0.63159000  |
| O | -1.14046500 | -0.43843800 | -0.09241000 |
| C | 9.30681700  | 2.49144700  | -0.37019200 |
| C | 8.68842200  | 3.44564600  | -1.19633600 |
| C | 10.39401200 | 2.90771900  | 0.41518700  |
| C | 9.13850800  | 4.76326100  | -1.23371200 |
| H | 7.86176000  | 3.14654800  | -1.83510600 |
| C | 10.84384700 | 4.22644900  | 0.37712300  |
| H | 10.87444000 | 2.19878900  | 1.08392700  |
| C | 10.22445600 | 5.17342200  | -0.44556700 |
| H | 8.64457400  | 5.47702100  | -1.88774800 |
| H | 11.67730000 | 4.54716300  | 0.99463000  |
| C | 10.27888900 | -2.42786800 | -0.07723000 |
| C | 10.07746700 | -3.65727900 | -0.72538400 |
| C | 11.45395500 | -2.30510000 | 0.68212700  |
| C | 10.98506700 | -4.70391100 | -0.62487800 |
| H | 9.19594400  | -3.79712900 | -1.34594300 |
| C | 12.37462600 | -3.33910600 | 0.79167700  |
| H | 11.64848200 | -1.38197900 | 1.22187700  |
| C | 12.17065000 | -4.58015300 | 0.14014800  |
| H | 10.76152100 | -5.62739100 | -1.14541500 |
| H | 13.26353100 | -3.17162800 | 1.38788500  |

|   |             |             |             |
|---|-------------|-------------|-------------|
| N | 10.72160700 | 6.52780100  | -0.45273200 |
| N | 13.08281700 | -5.61790000 | 0.24534400  |
| C | 9.74057100  | 7.51148300  | 0.03510400  |
| C | 9.33818900  | 7.27468600  | 1.48989300  |
| C | 15.47288600 | -4.88637700 | 0.50290300  |
| H | 8.66128400  | 8.06825600  | 1.82576100  |
| H | 8.82181500  | 6.31790500  | 1.61678100  |
| H | 10.22197600 | 7.27370300  | 2.13690000  |
| H | 15.26349900 | -3.85722200 | 0.19423600  |
| H | 16.30669500 | -4.86987900 | 1.21487300  |
| H | 15.79580000 | -5.44255200 | -0.38446900 |
| C | 11.30990200 | 6.92362300  | -1.74263100 |
| C | 14.23667400 | -5.53910400 | 1.13687900  |
| C | 12.94076500 | -6.84704800 | -0.52989600 |
| C | 12.53118100 | 6.08651300  | -2.12026800 |
| H | 12.26955100 | 5.03451400  | -2.27262000 |
| H | 12.97014000 | 6.46230800  | -3.05150100 |
| H | 13.28998300 | 6.13807100  | -1.33206600 |
| C | 12.06802900 | -7.91445400 | 0.14489500  |
| H | 11.05029600 | -7.54723900 | 0.31130000  |
| H | 12.01206700 | -8.81536800 | -0.47774900 |
| H | 12.48355300 | -8.20014800 | 1.11785900  |
| H | 10.21519400 | 8.49657700  | -0.05015700 |
| H | 8.83458600  | 7.54630700  | -0.59978800 |
| H | 10.56925900 | 6.89063500  | -2.56488800 |
| H | 11.61245900 | 7.97295000  | -1.64144000 |
| H | 13.95187200 | -5.01040300 | 2.05288200  |
| H | 14.48188700 | -6.56115700 | 1.44854800  |
| H | 12.54983000 | -6.60566100 | -1.52424600 |
| H | 13.94699700 | -7.24904700 | -0.69647900 |

### NS-5-TiO<sub>2</sub>

|    |             |             |             |
|----|-------------|-------------|-------------|
| Ti | 7.95294200  | 2.55880000  | -0.90114300 |
| Ti | 10.28441100 | 1.02971500  | -1.45229200 |
| Ti | 7.89424100  | -0.76275200 | -1.46256100 |
| Ti | 9.69851400  | 1.69103600  | 1.24551900  |
| Ti | 5.47722300  | -2.28448600 | -1.00563500 |
| Ti | 5.57225000  | 1.24105000  | -0.47705500 |
| Ti | 2.90350300  | -0.68027100 | -0.22041300 |
| Ti | 7.32300000  | -0.27538500 | 1.54971500  |
| Ti | 4.88227500  | -2.40783700 | 2.02977200  |
| O  | 9.45771500  | 2.47904300  | -2.07321600 |
| O  | 6.25584100  | 3.01890200  | -0.88243700 |
| O  | 9.60615300  | -0.47150500 | -2.18197500 |
| O  | 8.82865800  | 0.59008900  | 2.34685200  |
| O  | 11.16351400 | 1.34942800  | 0.13790600  |
| O  | 8.83053500  | 3.15356500  | 0.67558900  |
| O  | 3.84752000  | -1.74377600 | -1.45732000 |
| O  | 7.01232600  | 0.89674500  | -1.80766400 |
| O  | 3.82896200  | 0.91048700  | -0.58435400 |
| O  | 6.14345700  | -0.71750300 | -0.20490400 |
| O  | 3.47179800  | -1.30152600 | 1.30312100  |
| O  | 7.01370500  | -2.14754700 | -2.12872200 |
| O  | 8.44852100  | -1.51433000 | 0.34532200  |
| O  | 5.49339800  | -3.30326700 | 0.42294600  |
| O  | 6.34158100  | 1.26732200  | 1.16677300  |

|   |              |             |             |
|---|--------------|-------------|-------------|
| O | 4.37781600   | -3.41763000 | 3.18857400  |
| O | 6.42384100   | -1.32246900 | 2.58004600  |
| O | 8.78231500   | 0.89046300  | -0.21477900 |
| H | 8.31587000   | -2.46839000 | 0.48768600  |
| C | -6.96379300  | 0.60175200  | 0.31541800  |
| C | -7.44974200  | -0.71127200 | 0.21832000  |
| C | -8.82860200  | -0.94821400 | 0.10545400  |
| C | -9.71422800  | 0.14141000  | 0.09644100  |
| C | -9.23431200  | 1.45731800  | 0.16523700  |
| C | -7.85513800  | 1.68561000  | 0.27119600  |
| H | -6.76671000  | -1.55228700 | 0.25413300  |
| H | -10.78158900 | -0.03610400 | 0.04367600  |
| H | -7.48248400  | 2.70249100  | 0.28555400  |
| C | -5.52615500  | 0.86419000  | 0.43357900  |
| C | -4.91376000  | 1.97815800  | 0.99740500  |
| S | -4.34451600  | -0.26644900 | -0.16467400 |
| C | -3.51435500  | 1.91663600  | 0.96016100  |
| H | -5.47165000  | 2.79024200  | 1.44830500  |
| C | -3.01528700  | 0.75621800  | 0.36521400  |
| H | -2.86026100  | 2.68289400  | 1.36387500  |
| C | -1.63195400  | 0.47757900  | 0.22721100  |
| H | -0.97325600  | 1.25004700  | 0.61950400  |
| C | -0.97886400  | -0.60481200 | -0.31673900 |
| C | -1.64188300  | -1.72965700 | -0.89086500 |
| N | -2.20098900  | -2.63719700 | -1.35949200 |
| C | 0.48048700   | -0.61544400 | -0.30771700 |
| O | 1.16034100   | -1.59569600 | -0.78226700 |
| O | 1.17036100   | 0.35650700  | 0.17600600  |
| N | -9.32376600  | -2.26910800 | 0.03668900  |
| N | -10.13794100 | 2.54691100  | 0.14205800  |
| C | -8.67520800  | -3.31944700 | 0.75385800  |
| C | -8.38115000  | -4.53314700 | 0.11517000  |
| C | -8.33425700  | -3.15440700 | 2.10500600  |
| C | -7.76014100  | -5.56324700 | 0.82021000  |
| H | -8.63978500  | -4.66091500 | -0.93127200 |
| C | -7.69714300  | -4.18317100 | 2.79762400  |
| H | -8.56994300  | -2.21972400 | 2.60458400  |
| C | -7.41021200  | -5.39322400 | 2.16164600  |
| H | -7.53476100  | -6.49687100 | 0.31208600  |
| H | -7.43611300  | -4.04125300 | 3.84295100  |
| H | -6.91746600  | -6.19424600 | 2.70498100  |
| C | -10.47083400 | -2.57509800 | -0.75082000 |
| C | -11.47052300 | -3.41953800 | -0.24335600 |
| C | -10.61007900 | -2.05278800 | -2.04640000 |
| C | -12.58282600 | -3.73681500 | -1.02140200 |
| H | -11.36779000 | -3.82440600 | 0.75844200  |
| C | -11.73494400 | -2.36068400 | -2.81000600 |
| H | -9.83251300  | -1.41183000 | -2.44989000 |
| C | -12.72526500 | -3.20660200 | -2.30567100 |
| H | -13.34767700 | -4.39289000 | -0.61438900 |
| H | -11.82788800 | -1.94883200 | -3.81138600 |
| H | -13.59642300 | -3.45085100 | -2.90669800 |
| C | -11.28766900 | 2.51035900  | -0.69873700 |
| C | -12.53493600 | 2.93013700  | -0.21080200 |
| C | -11.18740200 | 2.06476200  | -2.02604400 |
| C | -13.65561500 | 2.90951600  | -1.03959000 |



|   |              |            |             |
|---|--------------|------------|-------------|
| H | -12.61800600 | 3.27139100 | 0.81625500  |
| C | -12.31732100 | 2.03014100 | -2.84190300 |
| H | -10.22242200 | 1.75146800 | -2.41210200 |
| C | -13.55594600 | 2.45570400 | -2.35682100 |
| H | -14.61440200 | 3.23767200 | -0.64702700 |
| H | -12.22351300 | 1.68320600 | -3.86754100 |
| H | -14.43279000 | 2.43420900 | -2.99749400 |
| C | -9.89417800  | 3.69663200 | 0.94627300  |
| C | -10.06759500 | 4.98449700 | 0.41520900  |
| C | -9.48425300  | 3.55905900 | 2.28254200  |
| C | -9.84025100  | 6.10811000 | 1.20879400  |
| H | -10.38125000 | 5.09713200 | -0.61773400 |
| C | -9.24169200  | 4.68847800 | 3.06290000  |
| H | -9.36122500  | 2.56596300 | 2.70314800  |
| C | -9.42124200  | 5.96898900 | 2.53387400  |
| H | -9.97962600  | 7.09789400 | 0.78214600  |
| H | -8.92701000  | 4.56448400 | 4.09583200  |
| H | -9.23930300  | 6.84675500 | 3.14725000  |

**NS-6-TiO<sub>2</sub>**

|    |              |             |             |
|----|--------------|-------------|-------------|
| Ti | -8.38045000  | 1.84831500  | -0.98591300 |
| Ti | -10.45045500 | 2.34394900  | 0.95904300  |
| Ti | -8.53750100  | 0.24575500  | 1.87558600  |
| Ti | -11.13202000 | 0.99180800  | -1.41444200 |
| Ti | -6.48670400  | -2.10614100 | 2.13741300  |
| Ti | -6.32842900  | 0.05635800  | -0.88802200 |
| Ti | -4.71763700  | -2.27858300 | -0.07807900 |
| Ti | -9.42730600  | -1.42287100 | -0.88238500 |
| Ti | -7.45789800  | -4.08976200 | -0.21251400 |
| O  | -9.19119400  | 3.22114100  | 0.08969100  |
| O  | -6.72028600  | 1.82772000  | -1.56938900 |
| O  | -9.75740900  | 1.52732700  | 2.44710100  |
| O  | -11.00639900 | -0.81630600 | -1.65287700 |
| O  | -11.91595100 | 2.11445900  | -0.14933600 |
| O  | -9.84707600  | 1.82950000  | -2.26851100 |
| O  | -4.84083800  | -2.66452300 | 1.83606400  |
| O  | -7.47968600  | 1.07831200  | 0.67607200  |
| O  | -5.04528700  | -0.89169700 | -1.52906000 |
| O  | -6.33332900  | -1.21779400 | 0.52912700  |
| O  | -5.65193400  | -3.62190200 | -0.70098900 |
| O  | -7.47530600  | -0.66432600 | 2.96768300  |
| O  | -9.35887400  | -1.40018300 | 1.08392900  |
| O  | -7.60853200  | -3.38208500 | 1.60423500  |
| O  | -8.06567500  | -0.34330700 | -1.50604000 |
| O  | -7.73915000  | -5.67974300 | -0.29019500 |
| O  | -8.89548900  | -3.05190200 | -1.08477100 |
| O  | -9.86684500  | 0.78692400  | 0.00291300  |
| H  | -9.01417700  | -2.25764300 | 1.45182500  |
| C  | 5.12346200   | -0.78437100 | -0.42154900 |
| C  | 5.29700400   | 0.60795500  | -0.36370600 |
| C  | 6.57341600   | 1.17607900  | -0.24552000 |
| C  | 7.68202700   | 0.31624500  | -0.19036400 |
| C  | 7.54362700   | -1.07974100 | -0.25425000 |
| C  | 6.25413600   | -1.61647200 | -0.36742700 |
| H  | 4.43447500   | 1.26011400  | -0.46110500 |
| H  | 8.67008400   | 0.74039300  | -0.04176800 |

|   |             |             |             |
|---|-------------|-------------|-------------|
| H | 6.12869300  | -2.69330400 | -0.41209400 |
| C | 3.78927800  | -1.37705700 | -0.55951100 |
| C | 3.45458700  | -2.60468100 | -1.11616100 |
| S | 2.37075200  | -0.54384900 | 0.01537400  |
| C | 2.07616700  | -2.86707800 | -1.08972700 |
| H | 4.18656900  | -3.27186400 | -1.55570700 |
| C | 1.31817600  | -1.84898400 | -0.51266000 |
| H | 1.62065900  | -3.76766100 | -1.48908100 |
| C | -0.09701400 | -1.89601700 | -0.38369100 |
| H | -0.55336700 | -2.80632400 | -0.76623500 |
| C | -0.98335400 | -0.98846700 | 0.14184400  |
| C | -0.59590400 | 0.26839600  | 0.69531000  |
| N | -0.26234000 | 1.29079500  | 1.14213600  |
| C | -2.41967200 | -1.29430500 | 0.15190100  |
| O | -3.28209600 | -0.52378500 | 0.62137800  |
| O | -2.82009200 | -2.44712800 | -0.36227400 |
| C | 6.74542000  | 2.64708800  | -0.17723500 |
| C | 5.81171200  | 3.46256000  | 0.48594200  |
| C | 7.84772200  | 3.28258400  | -0.77467300 |
| C | 5.97129900  | 4.84156500  | 0.55786800  |
| H | 4.96436300  | 3.00755400  | 0.99135800  |
| C | 8.00922100  | 4.66229800  | -0.72284500 |
| H | 8.57214600  | 2.69119700  | -1.32802800 |
| C | 7.07343400  | 5.46824400  | -0.05034900 |
| H | 5.24533800  | 5.44065000  | 1.09737900  |
| H | 8.85726000  | 5.12570100  | -1.21607700 |
| C | 8.73096100  | -1.96582400 | -0.18133400 |
| C | 8.68801600  | -3.19493500 | 0.49933700  |
| C | 9.94571500  | -1.60894500 | -0.79187200 |
| C | 9.80088300  | -4.02488800 | 0.57510000  |
| H | 7.77951700  | -3.48896100 | 1.01791300  |
| C | 11.06039900 | -2.43794900 | -0.73605600 |
| H | 10.00897400 | -0.68282300 | -1.35662800 |
| C | 11.00881200 | -3.66208900 | -0.04630700 |
| H | 9.74370900  | -4.95574500 | 1.12961800  |
| H | 11.97677100 | -2.14560900 | -1.23810200 |
| N | 7.23571700  | 6.87251900  | 0.01089300  |
| N | 12.14277200 | -4.50624900 | 0.02139500  |
| C | 8.53451500  | 7.44112300  | 0.13898400  |
| C | 8.89839600  | 8.55981600  | -0.62766000 |
| C | 9.46686000  | 6.89822000  | 1.03802000  |
| C | 10.16570000 | 9.12390800  | -0.49015600 |
| H | 8.18348100  | 8.98146300  | -1.32704800 |
| C | 10.73795500 | 7.45824900  | 1.15557300  |
| H | 9.18843800  | 6.03980300  | 1.64115600  |
| C | 11.09490900 | 8.57560000  | 0.39698700  |
| H | 10.43086600 | 9.98973500  | -1.09125200 |
| H | 11.44710400 | 7.02607700  | 1.85677900  |
| H | 12.08377400 | 9.01391100  | 0.49679900  |
| C | 6.10010800  | 7.73014800  | -0.05619400 |
| C | 5.98841300  | 8.82795200  | 0.81166500  |
| C | 5.08159800  | 7.49420500  | -0.99337000 |
| C | 4.88262500  | 9.67338800  | 0.73570900  |
| H | 6.77034800  | 9.01197300  | 1.54162400  |
| C | 3.97053800  | 8.33421500  | -1.04936500 |
| H | 5.16605800  | 6.65179400  | -1.67259900 |

|   |             |             |             |
|---|-------------|-------------|-------------|
| C | 3.86527500  | 9.43034200  | -0.18996600 |
| H | 4.81099100  | 10.51850900 | 1.41532000  |
| H | 3.18990400  | 8.13637900  | -1.77911700 |
| H | 3.00096800  | 10.08626100 | -0.24069600 |
| C | 13.44681400 | -3.94837000 | 0.14719700  |
| C | 13.68804600 | -2.88980400 | 1.03782900  |
| C | 14.51201300 | -4.45551300 | -0.61407000 |
| C | 14.96644800 | -2.34601400 | 1.15269000  |
| H | 12.87096400 | -2.49957900 | 1.63639300  |
| C | 15.79078100 | -3.91723600 | -0.47905100 |
| H | 14.33060300 | -5.27058200 | -1.30749000 |
| C | 16.02615000 | -2.85741700 | 0.39984400  |
| H | 15.13609800 | -1.52731600 | 1.84711700  |
| H | 16.60418100 | -4.32164200 | -1.07576600 |
| H | 17.02253300 | -2.43604000 | 0.49750600  |
| C | 11.98844800 | -5.92081700 | -0.03284200 |
| C | 11.11767200 | -6.50872600 | -0.96450600 |
| C | 12.71168300 | -6.74791900 | 0.84127800  |
| C | 10.96828600 | -7.89395800 | -1.00955900 |
| H | 10.56315700 | -5.87510700 | -1.64954200 |
| C | 12.56922100 | -8.13312900 | 0.77675600  |
| H | 13.38267700 | -6.29886500 | 1.56666400  |
| C | 11.69467600 | -8.71508800 | -0.14388200 |
| H | 10.29061400 | -8.33301300 | -1.73708400 |
| H | 13.13639100 | -8.75895600 | 1.46076300  |
| H | 11.58118000 | -9.79450300 | -0.18674900 |

#### NS-8-TiO<sub>2</sub>

|    |              |             |             |
|----|--------------|-------------|-------------|
| Ti | -10.50264400 | -1.53204600 | -2.43012400 |
| Ti | -12.87479300 | -0.15171700 | -1.69208700 |
| Ti | -10.52415500 | 1.13238700  | -0.36870100 |
| Ti | -12.23326900 | -2.56739000 | -0.34636300 |
| Ti | -8.13337400  | 1.88957100  | 1.07246400  |
| Ti | -8.14452500  | -0.88954100 | -1.16136100 |
| Ti | -5.51306800  | 0.29296500  | 0.44022100  |
| Ti | -9.89581800  | -1.39729100 | 1.31792200  |
| Ti | -7.49344200  | -0.24286100 | 3.22420300  |
| O  | -12.02702200 | -0.65581200 | -3.17419900 |
| O  | -8.79631100  | -1.81392600 | -2.74736600 |
| O  | -12.24043000 | 1.41958400  | -1.07963400 |
| O  | -11.37041700 | -2.60849400 | 1.21416200  |
| O  | -13.72237600 | -1.55989500 | -0.85401800 |
| O  | -11.34321200 | -3.11681200 | -1.80334300 |
| O  | -6.49949700  | 1.89779300  | 0.37761500  |
| O  | -9.61263500  | 0.28437100  | -1.81825100 |
| O  | -6.41146600  | -0.54095100 | -0.98163300 |
| O  | -8.75388800  | 0.22270600  | 0.45919300  |
| O  | -6.07083600  | -0.42235400 | 1.92587000  |
| O  | -9.68373400  | 2.58311900  | 0.20240400  |
| O  | -11.06606700 | 0.29866800  | 1.40658000  |
| O  | -8.14920000  | 1.52889600  | 2.78948700  |
| O  | -8.88792100  | -2.13569200 | -0.07055800 |
| O  | -6.99412400  | -0.39712700 | 4.75504000  |
| O  | -9.00309000  | -1.42216000 | 2.79051900  |
| O  | -11.35728500 | -0.92777400 | -0.74269100 |
| H  | -10.95050300 | 0.84381400  | 2.20505600  |

|   |             |             |             |
|---|-------------|-------------|-------------|
| C | 4.82319600  | 0.69891000  | -0.24991700 |
| C | 6.18855400  | 1.01027500  | -0.18008000 |
| C | 7.10925900  | -0.04920300 | -0.13058100 |
| C | 6.70198900  | -1.39343000 | -0.15290100 |
| C | 5.32969300  | -1.67033600 | -0.21757400 |
| C | 4.38119100  | -0.63429900 | -0.26492800 |
| H | 4.10239900  | 1.50551100  | -0.34305800 |
| H | 8.16486800  | 0.17773700  | -0.01923400 |
| H | 4.99772600  | -2.70311000 | -0.22976800 |
| C | 2.95511400  | -0.95748300 | -0.35445300 |
| C | 2.37350300  | -2.13085500 | -0.82480100 |
| S | 1.73941900  | 0.17712300  | 0.16490500  |
| C | 0.97382400  | -2.11283700 | -0.77648900 |
| H | 2.95165400  | -2.95810200 | -1.21849500 |
| C | 0.44011800  | -0.92586800 | -0.26975300 |
| H | 0.34268500  | -2.93012700 | -1.11077000 |
| C | -0.94954300 | -0.68256400 | -0.13811000 |
| H | -1.58565000 | -1.50896500 | -0.44942900 |
| C | -1.63389100 | 0.42274400  | 0.31570800  |
| C | -1.00328200 | 1.62014700  | 0.76616600  |
| C | -3.09169100 | 0.38011500  | 0.33709200  |
| O | -3.79983600 | 1.36980400  | 0.74717600  |
| O | -3.75412800 | -0.65012100 | -0.05702300 |
| N | -0.46945500 | 2.59068800  | 1.12539500  |
| C | 6.64430000  | 2.41967900  | -0.15428300 |
| C | 5.90972000  | 3.41471100  | 0.51481000  |
| C | 7.82736000  | 2.82008700  | -0.79878100 |
| C | 6.33274700  | 4.73748700  | 0.54659700  |
| H | 5.00849400  | 3.14287200  | 1.05776100  |
| C | 8.25383800  | 4.14274400  | -0.78779600 |
| H | 8.40668700  | 2.08965200  | -1.35736700 |
| C | 7.51496100  | 5.13171900  | -0.10993400 |
| H | 5.75336600  | 5.47316700  | 1.09373600  |
| H | 9.15781700  | 4.42041000  | -1.31905600 |
| C | 7.69617600  | -2.49125500 | -0.08879700 |
| C | 7.43631400  | -3.67901500 | 0.61720500  |
| C | 8.94073800  | -2.38850200 | -0.73375700 |
| C | 8.36741200  | -4.70840000 | 0.68349900  |
| H | 6.50318300  | -3.78375700 | 1.16446100  |
| C | 9.87550600  | -3.41598300 | -0.68692400 |
| H | 9.16848200  | -1.50147300 | -1.31881100 |
| C | 9.60898400  | -4.59931700 | 0.02799300  |
| H | 8.14403900  | -5.59995500 | 1.25965200  |
| H | 10.81612100 | -3.31200400 | -1.21708700 |
| N | 7.94435100  | 6.47314000  | -0.08848000 |
| C | 6.99914700  | 7.54018800  | -0.01450800 |
| C | 5.88463600  | 7.57749800  | -0.85929000 |
| C | 7.17944200  | 8.58790100  | 0.90516200  |
| C | 4.95579300  | 8.61811500  | -0.78320800 |
| H | 5.73427900  | 6.77956600  | -1.58001100 |
| C | 6.27371200  | 9.63732800  | 0.97069500  |
| H | 8.03941600  | 8.57289400  | 1.56754300  |
| C | 5.14869400  | 9.65977400  | 0.13181000  |
| H | 4.10000600  | 8.60901200  | -1.44849800 |
| H | 6.40803800  | 10.44852900 | 1.67944400  |
| C | 9.33205200  | 6.79551300  | -0.15826100 |

|   |             |              |             |
|---|-------------|--------------|-------------|
| C | 10.26458700 | 6.15285900   | 0.67583600  |
| C | 9.79284100  | 7.77790200   | -1.04080000 |
| C | 11.61278100 | 6.47571300   | 0.61262900  |
| H | 9.92258200  | 5.39504600   | 1.37393400  |
| C | 11.14523000 | 8.12431000   | -1.09439200 |
| H | 9.08488500  | 8.28449100   | -1.68943800 |
| C | 12.06642200 | 7.46822300   | -0.27013500 |
| H | 12.33636000 | 5.98214900   | 1.25398000  |
| H | 11.46388200 | 8.89439000   | -1.78765800 |
| O | 4.31333300  | 10.72886700  | 0.28494100  |
| O | 13.40931200 | 7.71799200   | -0.24524200 |
| C | 3.14931400  | 10.78995300  | -0.52234600 |
| C | 13.92048400 | 8.71357900   | -1.11479500 |
| H | 14.99576500 | 8.75078100   | -0.93001400 |
| H | 13.74317300 | 8.46055700   | -2.16892700 |
| H | 13.48275800 | 9.69876800   | -0.90409100 |
| H | 2.49256100  | 9.92668500   | -0.35064300 |
| H | 2.62800700  | 11.70300900  | -0.22879700 |
| H | 3.39982300  | 10.84411300  | -1.59048900 |
| N | 10.55633700 | -5.64093800  | 0.08908500  |
| C | 10.13777400 | -7.00162400  | 0.18069500  |
| C | 10.71951400 | -7.86384300  | 1.12664300  |
| C | 9.15588000  | -7.51409700  | -0.67417200 |
| C | 10.33173400 | -9.19390200  | 1.20687200  |
| H | 11.48299700 | -7.48123500  | 1.79685900  |
| C | 8.74397100  | -8.84609200  | -0.58455700 |
| H | 8.70277200  | -6.86357200  | -1.41602100 |
| C | 9.33578000  | -9.69744700  | 0.35580200  |
| H | 10.77856000 | -9.86364600  | 1.93503300  |
| H | 7.97741100  | -9.20651000  | -1.26112900 |
| C | 11.95353700 | -5.35720300  | 0.04048700  |
| C | 12.79975600 | -6.07909900  | -0.80746700 |
| C | 12.51559300 | -4.36271700  | 0.86112100  |
| C | 14.17409300 | -5.83000300  | -0.83968900 |
| H | 12.38122200 | -6.85101500  | -1.44588200 |
| C | 13.87633200 | -4.09407800  | 0.81823000  |
| H | 11.87465900 | -3.79949600  | 1.53236100  |
| C | 14.72056100 | -4.82824600  | -0.02949400 |
| H | 14.79904000 | -6.41352900  | -1.50612100 |
| H | 14.31469700 | -3.32690900  | 1.44889500  |
| O | 9.02005200  | -11.01562300 | 0.52366300  |
| O | 16.04391400 | -4.49318000  | 0.01338400  |
| C | 8.02096900  | -11.57624300 | -0.31086900 |
| C | 16.94146400 | -5.20373700  | -0.82241500 |
| H | 17.92970300 | -4.78224600  | -0.62905700 |
| H | 16.95261500 | -6.27619300  | -0.58517200 |
| H | 16.69429400 | -5.07391300  | -1.88477600 |
| H | 8.30664500  | -11.53171200 | -1.37058900 |
| H | 7.92717300  | -12.62062900 | -0.00740300 |
| H | 7.05369800  | -11.07275000 | -0.17860400 |

**Cb-1-TiO<sub>2</sub>**

|    |             |             |             |
|----|-------------|-------------|-------------|
| Ti | 8.06164600  | 1.20660700  | -2.00216400 |
| Ti | 10.20296900 | -0.62459400 | -1.48765700 |
| Ti | 7.65010100  | -1.76058600 | -0.44861600 |
| Ti | 9.89383700  | 1.63778000  | 0.18390700  |

|    |              |             |             |
|----|--------------|-------------|-------------|
| Ti | 5.06750900   | -2.30463800 | 0.75714100  |
| Ti | 5.59064400   | 0.58716100  | -1.21843200 |
| Ti | 2.71286000   | -0.33675600 | 0.13740100  |
| Ti | 7.29255500   | 0.64263300  | 1.42988900  |
| Ti | 4.56985500   | -0.29016200 | 3.03998700  |
| O  | 9.48566400   | 0.25532100  | -2.85270900 |
| O  | 6.46621000   | 1.60967700  | -2.62536400 |
| O  | 9.33484700   | -2.18021000 | -1.13209600 |
| O  | 8.88874100   | 1.62604000  | 1.67078700  |
| O  | 11.23360200  | 0.49708800  | -0.44915700 |
| O  | 9.17299200   | 2.52947800  | -1.16968300 |
| O  | 3.48878400   | -2.04498500 | -0.02308500 |
| O  | 6.96651800   | -0.65562300 | -1.83239800 |
| O  | 3.81873500   | 0.49795200  | -1.13130900 |
| O  | 5.90979600   | -0.68137200 | 0.36214400  |
| O  | 3.25024600   | 0.18218000  | 1.70891900  |
| O  | 6.57154900   | -3.12128000 | -0.08432100 |
| O  | 8.11512300   | -1.22299000 | 1.47266300  |
| O  | 5.01778400   | -2.09857400 | 2.50192000  |
| O  | 6.65293000   | 1.59289300  | -0.09575000 |
| O  | 4.00683600   | -0.19752300 | 4.55385300  |
| O  | 6.22955600   | 0.72978300  | 2.78087400  |
| O  | 8.80377100   | 0.18716300  | -0.43869700 |
| H  | 7.79266500   | -1.80937600 | 2.18070600  |
| C  | -7.25068700  | -0.52159200 | 0.05434200  |
| C  | -7.56749000  | 0.84411200  | 0.02034700  |
| C  | -8.90449500  | 1.26108100  | -0.11141700 |
| C  | -9.90525200  | 0.27974300  | -0.24873000 |
| C  | -9.59617000  | -1.09078700 | -0.23871000 |
| C  | -8.26131200  | -1.48870900 | -0.06239600 |
| H  | -6.77878300  | 1.58140600  | 0.08550000  |
| H  | -10.93653500 | 0.58487400  | -0.36198200 |
| H  | -8.01747200  | -2.54106900 | -0.01041200 |
| C  | -5.85973400  | -0.95984800 | 0.21870300  |
| C  | -5.40550200  | -2.17675800 | 0.71647100  |
| S  | -4.52642700  | 0.07012800  | -0.22441000 |
| C  | -4.00837600  | -2.27446700 | 0.75057400  |
| H  | -6.07114900  | -2.95413600 | 1.07165100  |
| C  | -3.35033100  | -1.13641700 | 0.28031400  |
| H  | -3.46788100  | -3.14057200 | 1.11897400  |
| C  | -1.93935700  | -1.00827800 | 0.23438500  |
| H  | -1.39399700  | -1.88256300 | 0.58457000  |
| C  | -1.14025700  | 0.03595600  | -0.17288200 |
| C  | -1.64154500  | 1.27772000  | -0.66392200 |
| N  | -2.07003500  | 2.28343100  | -1.06479400 |
| C  | 0.30807100   | -0.11977100 | -0.09168100 |
| O  | 1.11778200   | 0.81802800  | -0.42433600 |
| O  | 0.85878400   | -1.20829300 | 0.32096700  |
| C  | -8.24896500  | 6.08275700  | -0.27058600 |
| C  | -6.78231400  | 5.01761500  | 1.33035900  |
| C  | -8.88646000  | 4.86678400  | -0.47778100 |
| H  | -8.57928800  | 6.97154800  | -0.80339200 |
| C  | -7.41612400  | 3.78598300  | 1.13233100  |
| H  | -5.96793600  | 5.07962000  | 2.04694900  |
| C  | -8.45590000  | 3.71330600  | 0.19894400  |
| H  | -7.11449200  | 2.92149500  | 1.71218900  |

|   |              |             |             |
|---|--------------|-------------|-------------|
| C | -9.72986500  | -5.09680100 | -2.34019500 |
| C | -11.95314100 | -5.23000800 | -1.40220800 |
| C | -9.53202200  | -3.83378500 | -1.76951200 |
| H | -8.93634600  | -5.52618200 | -2.94639600 |
| C | -11.77260000 | -3.97922800 | -0.82996200 |
| H | -12.89455500 | -5.75886600 | -1.27161000 |
| C | -10.55995500 | -3.28259100 | -0.99586500 |
| H | -8.61241200  | -3.29250000 | -1.95691300 |
| N | -10.62279700 | -2.03547400 | -0.35390900 |
| C | -12.71872800 | -3.15400800 | 0.00468400  |
| C | -11.99634300 | -1.77190000 | 0.12974000  |
| C | -12.08296600 | -1.36495400 | 1.62594100  |
| C | -12.94503700 | -3.61962900 | 1.46561500  |
| C | -13.14639100 | -2.30333400 | 2.23163400  |
| C | -10.07862200 | 4.54741100  | -1.35578200 |
| C | -10.42040700 | 3.07302700  | -0.94671100 |
| C | -11.34694600 | 5.36841000  | -1.03054800 |
| C | -11.75570200 | 3.15898900  | -0.14693700 |
| H | -12.57749900 | 2.81069500  | -0.78676700 |
| C | -11.95094000 | 4.65050500  | 0.18593700  |
| N | -9.25788600  | 2.61113900  | -0.15480400 |
| H | -10.52501700 | 2.41286800  | -1.81252300 |
| H | -9.81284100  | 4.62762000  | -2.41722000 |
| H | -11.73734500 | 2.52255700  | 0.74287500  |
| H | -12.99989000 | 4.91156500  | 0.36113000  |
| H | -11.38954600 | 4.91369100  | 1.09030800  |
| H | -12.04321100 | 5.32474400  | -1.87859700 |
| H | -11.12290300 | 6.42393100  | -0.84460200 |
| H | -12.47763600 | -1.02294900 | -0.51388100 |
| H | -13.69126700 | -3.03002800 | -0.48598900 |
| H | -12.32355900 | -0.30620500 | 1.76447400  |
| H | -11.11186400 | -1.54210100 | 2.10136800  |
| H | -14.15359000 | -1.90966700 | 2.03907300  |
| H | -13.04246900 | -2.41275300 | 3.31647800  |
| H | -13.78681400 | -4.31394200 | 1.55798200  |
| H | -12.04881400 | -4.13608500 | 1.83190000  |
| C | -7.18087000  | 6.15876900  | 0.63271600  |
| C | -10.92066600 | -5.80099600 | -2.15930400 |
| H | -6.67205600  | 7.10396900  | 0.79658400  |
| H | -11.05269800 | -6.77896700 | -2.61257500 |

### Cb-7-TiO<sub>2</sub>

|    |             |             |             |
|----|-------------|-------------|-------------|
| Ti | 8.04806800  | 0.36317300  | 2.52595200  |
| Ti | 10.20000100 | 2.13860400  | 1.79655500  |
| Ti | 8.43400800  | 1.51196300  | -0.52483200 |
| Ti | 10.80674600 | -0.55629900 | 2.33901300  |
| Ti | 6.50378100  | 0.22316600  | -2.62753300 |
| Ti | 6.08357800  | -0.68934700 | 0.95589700  |
| Ti | 4.62241900  | -1.55447200 | -1.45687900 |
| Ti | 9.24061200  | -1.68401500 | 0.03810700  |
| Ti | 7.42877100  | -2.86613500 | -2.56126800 |
| O  | 8.85769900  | 2.05917900  | 2.93760400  |
| O  | 6.36075700  | -0.07139900 | 2.77209500  |
| O  | 9.62679700  | 2.75847200  | 0.16900800  |
| O  | 10.74653800 | -1.90407000 | 1.10517400  |
| O  | 11.61040500 | 1.12297400  | 2.43606500  |

|   |              |             |             |
|---|--------------|-------------|-------------|
| O | 9.44119000   | -0.64943300 | 3.43817900  |
| O | 4.87058300   | -0.34453300 | -2.97503500 |
| O | 7.27627700   | 1.14958700  | 0.80906600  |
| O | 4.81025100   | -1.77321600 | 0.55784800  |
| O | 6.22104400   | -0.42698600 | -0.92581100 |
| O | 5.58074400   | -2.91025900 | -2.01411100 |
| O | 7.47416100   | 1.77401600  | -1.99421900 |
| O | 9.28004600   | -0.16715900 | -1.21444400 |
| O | 7.64927000   | -1.02379400 | -3.17887100 |
| O | 7.80075000   | -1.44272300 | 1.16831800  |
| O | 7.77345800   | -3.95562900 | -3.70483200 |
| O | 8.76979700   | -2.88318500 | -1.10991700 |
| O | 9.63281800   | 0.41207900  | 1.18339200  |
| H | 8.99306100   | -0.43484100 | -2.12854600 |
| C | -5.27682000  | -0.72878000 | -0.78545700 |
| C | -5.53618800  | 0.65056800  | -0.74231300 |
| C | -6.82776500  | 1.13960700  | -0.49779100 |
| C | -7.86149900  | 0.20946400  | -0.29957000 |
| C | -7.63908000  | -1.17679000 | -0.34839100 |
| C | -6.33542700  | -1.63169500 | -0.59045300 |
| H | -4.73483600  | 1.35254800  | -0.95134300 |
| H | -8.85363600  | 0.57228600  | -0.04992800 |
| H | -6.14189500  | -2.69884700 | -0.62439400 |
| C | -3.92773500  | -1.23549800 | -1.05304300 |
| C | -3.56798300  | -2.45285600 | -1.61821600 |
| S | -2.51798900  | -0.29396500 | -0.64891900 |
| C | -2.18011300  | -2.62058300 | -1.73481800 |
| H | -4.29445000  | -3.17847500 | -1.96432900 |
| C | -1.43769100  | -1.53841600 | -1.26186000 |
| H | -1.70737200  | -3.49819800 | -2.16431100 |
| C | -0.01825100  | -1.48639400 | -1.28467500 |
| H | 0.45763400   | -2.37291600 | -1.69808600 |
| C | 0.85452700   | -0.50783200 | -0.87365000 |
| C | 0.44239700   | 0.73441500  | -0.30531900 |
| N | 0.08965600   | 1.74361400  | 0.15670700  |
| C | 2.30005800   | -0.71615100 | -1.01424800 |
| O | 3.15367500   | 0.12832100  | -0.67145300 |
| O | 2.72355800   | -1.85923100 | -1.53331600 |
| C | -7.08969700  | 2.59747600  | -0.44418900 |
| C | -6.13202900  | 3.49038200  | 0.08403300  |
| C | -8.29000700  | 3.13961800  | -0.93220600 |
| C | -6.38719000  | 4.84905700  | 0.12757900  |
| H | -5.19340400  | 3.10661900  | 0.47650000  |
| C | -8.56314000  | 4.50824600  | -0.89589000 |
| H | -9.02262100  | 2.47919900  | -1.38804000 |
| C | -7.60606900  | 5.36990200  | -0.34499200 |
| H | -9.48661300  | 4.88584900  | -1.31835800 |
| C | -8.74968200  | -2.13391300 | -0.12453500 |
| C | -10.03839100 | -1.87670400 | -0.61996700 |
| C | -8.54513500  | -3.33882100 | 0.58160700  |
| C | -11.10558500 | -2.75603800 | -0.42639400 |
| H | -10.20917000 | -0.97826900 | -1.20676800 |
| C | -9.59153400  | -4.22105300 | 0.78331800  |
| H | -7.56270600  | -3.56523500 | 0.98889100  |
| C | -10.88263600 | -3.93534500 | 0.29523400  |
| H | -12.07239300 | -2.53459300 | -0.86217300 |



|   |              |             |             |
|---|--------------|-------------|-------------|
| N | -11.76248100 | -4.97642300 | 0.59699100  |
| C | -9.61102800  | -5.54496100 | 1.50540300  |
| C | -11.03136500 | -6.11959700 | 1.18705600  |
| C | -11.61380400 | -6.62478700 | 2.53455400  |
| C | -9.53894200  | -5.49334400 | 3.05307200  |
| C | -10.40514000 | -6.68466900 | 3.49029000  |
| C | -13.13760500 | -5.03409900 | 0.31521700  |
| C | -13.73834600 | -6.25648000 | -0.03917400 |
| C | -13.95479800 | -3.89231200 | 0.42092000  |
| C | -15.10599400 | -6.32537900 | -0.29876700 |
| H | -13.13242300 | -7.15275600 | -0.12169900 |
| C | -15.31854800 | -3.97065100 | 0.14551000  |
| H | -13.52393700 | -2.95297100 | 0.74869200  |
| C | -15.90600600 | -5.18422300 | -0.21819900 |
| H | -15.54547500 | -7.28062800 | -0.57427500 |
| H | -15.92856800 | -3.07541500 | 0.23515500  |
| H | -16.97044000 | -5.24127200 | -0.42602900 |
| C | -5.50346800  | 5.97015400  | 0.62542800  |
| C | -6.30862300  | 7.26339400  | 0.25058000  |
| C | -5.31272900  | 6.02741200  | 2.17094100  |
| C | -6.41478400  | 8.08006100  | 1.55454000  |
| H | -5.53549500  | 8.73336600  | 1.63384200  |
| C | -6.38030100  | 7.01874200  | 2.66570800  |
| N | -7.62334800  | 6.75842900  | -0.21862100 |
| C | -8.68780000  | 7.61915500  | -0.53854700 |
| C | -10.02202600 | 7.26099100  | -0.26665900 |
| C | -8.43688100  | 8.88255400  | -1.10588200 |
| C | -11.06680000 | 8.12576200  | -0.58700900 |
| H | -10.23365200 | 6.31597400  | 0.22108500  |
| C | -9.48880000  | 9.74576700  | -1.40785700 |
| H | -7.41756100  | 9.18577100  | -1.32109900 |
| C | -10.81127400 | 9.37297200  | -1.16075100 |
| H | -12.08836300 | 7.82611900  | -0.36726800 |
| H | -9.26905600  | 10.71461300 | -1.84898100 |
| H | -11.62824800 | 10.04630700 | -1.40309100 |
| H | -5.82223800  | 7.82988300  | -0.55263800 |
| H | -4.53083200  | 5.94563600  | 0.12301800  |
| H | -7.30199400  | 8.71966500  | 1.57733200  |
| H | -6.14995200  | 7.43847400  | 3.65060200  |
| H | -7.35618300  | 6.52269300  | 2.73901000  |
| H | -4.31230700  | 6.41440700  | 2.40181700  |
| H | -5.39434100  | 5.03681100  | 2.62948100  |
| H | -10.96619700 | -6.93393300 | 0.45326600  |
| H | -8.83457600  | -6.22325600 | 1.13268100  |
| H | -12.12940800 | -7.58539300 | 2.43958200  |
| H | -12.34674700 | -5.89750000 | 2.90111900  |
| H | -9.85174400  | -7.62221400 | 3.34423600  |
| H | -10.69891600 | -6.64182500 | 4.54457800  |
| H | -8.51028300  | -5.53875500 | 3.42589000  |
| H | -9.97947500  | -4.55490900 | 3.41257400  |

#### H-4-TiO<sub>2</sub>

|    |              |            |             |
|----|--------------|------------|-------------|
| Ti | -7.36975700  | 2.03000500 | -0.96665800 |
| Ti | -9.44188700  | 2.47329700 | 0.98900200  |
| Ti | -7.52709700  | 0.35468900 | 1.85276600  |
| Ti | -10.12053800 | 1.18224100 | -1.41886000 |

|    |              |             |             |
|----|--------------|-------------|-------------|
| Ti | -5.47234500  | -2.00030500 | 2.05366300  |
| Ti | -5.31468700  | 0.23938900  | -0.91440300 |
| Ti | -3.70137700  | -2.11386100 | -0.16457900 |
| Ti | -8.41268000  | -1.24259100 | -0.94834900 |
| Ti | -6.44024900  | -3.92386700 | -0.34740400 |
| O  | -8.18323100  | 3.37404700  | 0.14339000  |
| O  | -5.70908900  | 2.02785400  | -1.54872000 |
| O  | -8.74911700  | 1.62001700  | 2.45635500  |
| O  | -9.99219400  | -0.61903700 | -1.70413400 |
| O  | -10.90666500 | 2.27123600  | -0.12597000 |
| O  | -8.83622400  | 2.04326700  | -2.25003800 |
| O  | -3.82623500  | -2.54991700 | 1.73928200  |
| O  | -6.46999300  | 1.21940400  | 0.67626800  |
| O  | -4.03204800  | -0.69084500 | -1.58088100 |
| O  | -5.31829700  | -1.06991400 | 0.46952600  |
| O  | -4.63497700  | -3.44128500 | -0.82236500 |
| O  | -6.46358300  | -0.58191600 | 2.92102000  |
| O  | -8.34492900  | -1.27144900 | 1.01789100  |
| O  | -6.59273600  | -3.26301300 | 1.48682800  |
| O  | -7.05232900  | -0.14475300 | -1.54258100 |
| O  | -6.71983300  | -5.51171200 | -0.46584100 |
| O  | -7.87852200  | -2.86505500 | -1.19303600 |
| O  | -8.85640700  | 0.94193900  | -0.00619400 |
| H  | -7.99876500  | -2.13770000 | 1.36329800  |
| C  | 4.80214200   | -1.17923400 | -0.61601300 |
| C  | 4.47285400   | -2.38950300 | -1.21317500 |
| S  | 3.38016300   | -0.37162200 | -0.01497400 |
| C  | 3.09548900   | -2.65751900 | -1.19732800 |
| H  | 5.20835100   | -3.03681900 | -1.67608700 |
| C  | 2.33202600   | -1.66159100 | -0.58827700 |
| H  | 2.64374800   | -3.54548600 | -1.62812500 |
| C  | 0.91781700   | -1.71577300 | -0.46269700 |
| H  | 0.46333500   | -2.61524500 | -0.87219800 |
| C  | 0.02878200   | -0.82487400 | 0.08847800  |
| C  | 0.41419100   | 0.41679800  | 0.67657500  |
| N  | 0.74773700   | 1.42677400  | 1.15102200  |
| C  | -1.40589800  | -1.13329800 | 0.08984800  |
| O  | -2.27099800  | -0.37752600 | 0.57918300  |
| O  | -1.80477700  | -2.27327400 | -0.45426100 |
| C  | 7.72977400   | 2.83555500  | -0.13519200 |
| C  | 8.83336300   | 3.62971700  | -0.40266100 |
| C  | 7.11595200   | 4.98229900  | 0.24223800  |
| C  | 8.46749800   | 4.98786900  | -0.17351800 |
| N  | 6.68356400   | 3.67506700  | 0.23300600  |
| H  | 5.81781400   | 3.35774200  | 0.64115300  |
| H  | 9.78545900   | 3.27170100  | -0.76991600 |
| C  | 6.41492400   | 6.16970600  | 0.58027600  |
| C  | 9.15425000   | 6.23836700  | -0.27892300 |
| C  | 8.46668900   | 7.42728000  | 0.05284800  |
| C  | 7.11779200   | 7.39320300  | 0.47974000  |
| C  | 10.47882800  | 6.62093400  | -0.66429600 |
| C  | 5.08851800   | 6.48198600  | 1.02733700  |
| C  | 5.02067300   | 7.84361000  | 1.18293700  |
| C  | 10.56153600  | 7.98820700  | -0.56125500 |
| H  | 11.38530400  | 8.65864000  | -0.76067300 |
| H  | 4.20135200   | 8.47196000  | 1.50117000  |

|   |             |             |             |
|---|-------------|-------------|-------------|
| H | 11.27662600 | 5.96296600  | -0.98026600 |
| H | 4.27818600  | 5.78902700  | 1.20894400  |
| N | 9.34529800  | 8.48031600  | -0.12590500 |
| N | 6.24536400  | 8.39687300  | 0.85250600  |
| H | 6.45494000  | 9.38121100  | 0.88581100  |
| H | 9.14281200  | 9.45535500  | 0.02240700  |
| C | 9.73419400  | -1.71015100 | -0.18317000 |
| C | 11.05209900 | -1.44363400 | -0.51235800 |
| C | 11.81490500 | -2.62578200 | -0.27723300 |
| C | 10.91595900 | -3.60301400 | 0.20656800  |
| N | 9.65836300  | -3.03841100 | 0.22537900  |
| H | 8.86552600  | -3.43192500 | 0.70843000  |
| C | 13.19493000 | -2.96907900 | -0.42934400 |
| C | 11.33203400 | -4.91021900 | 0.57217100  |
| C | 12.70403000 | -5.22322100 | 0.42621900  |
| C | 13.62143900 | -4.26791300 | -0.07155200 |
| C | 10.68684600 | -6.08310000 | 1.08709100  |
| C | 14.35434200 | -2.26489100 | -0.88684900 |
| H | 15.57156300 | -5.14104600 | -0.15390700 |
| H | 14.39429000 | -1.24329100 | -1.23883300 |
| C | 15.42206400 | -3.12447000 | -0.79936000 |
| H | 16.46358200 | -2.97736400 | -1.04720500 |
| C | 11.65121300 | -7.04802500 | 1.23707200  |
| H | 11.57550600 | -8.06467500 | 1.59502900  |
| H | 9.63713800  | -6.20521400 | 1.31755300  |
| N | 14.98283000 | -4.33833500 | -0.30481100 |
| N | 12.87071500 | -6.53147200 | 0.83746200  |
| H | 13.73993300 | -7.03951500 | 0.85671200  |
| C | 6.13077600  | -0.58126700 | -0.45515700 |
| C | 7.26487400  | -1.40704400 | -0.39978300 |
| C | 8.55037700  | -0.85714900 | -0.25592800 |
| C | 8.67679400  | 0.53779300  | -0.15791800 |
| C | 7.56170100  | 1.38896200  | -0.22739900 |
| C | 6.28880600  | 0.81118800  | -0.37794800 |
| H | 7.14407200  | -2.48297100 | -0.47616400 |
| H | 9.65808200  | 0.96605000  | 0.01642700  |
| H | 5.41988900  | 1.45070100  | -0.50067400 |
| H | 11.41506500 | -0.51265000 | -0.92599800 |

### H-7-TiO<sub>2</sub>

|    |             |             |             |
|----|-------------|-------------|-------------|
| Ti | 10.78865700 | 0.92768300  | -2.05805700 |
| Ti | 12.90900500 | -0.97911300 | -1.80716500 |
| Ti | 10.37909700 | -2.15978400 | -0.76086000 |
| Ti | 12.71954800 | 1.12433300  | 0.07682000  |
| Ti | 7.84143300  | -2.76929600 | 0.50665200  |
| Ti | 8.34092900  | 0.28859800  | -1.20998700 |
| Ti | 5.50589000  | -0.70862000 | 0.18352200  |
| Ti | 10.15557400 | 0.06239300  | 1.34875200  |
| Ti | 7.48947800  | -0.97257200 | 2.99040000  |
| O  | 12.15278700 | 0.03442400  | -3.05445500 |
| O  | 9.17520200  | 1.42067200  | -2.55754800 |
| O  | 12.02316500 | -2.54438300 | -1.55649500 |
| O  | 11.78340400 | 0.99103900  | 1.60163600  |
| O  | 14.00644800 | 0.02364100  | -0.71733800 |
| O  | 11.95942000 | 2.14929700  | -1.15644200 |

|   |              |             |             |
|---|--------------|-------------|-------------|
| O | 6.23658400   | -2.40788900 | -0.17210800 |
| O | 9.65953300   | -0.91639300 | -2.00297000 |
| O | 6.57250000   | 0.22248900  | -1.05010900 |
| O | 8.70231500   | -1.13151200 | 0.22625500  |
| O | 6.12214500   | -0.35445000 | 1.77171100  |
| O | 9.28857300   | -3.52949100 | -0.47637300 |
| O | 10.94210600  | -1.81260700 | 1.17681800  |
| O | 7.87357000   | -2.72885300 | 2.26340900  |
| O | 9.46543300   | 1.16528300  | -0.04429600 |
| O | 6.99700500   | -1.01462100 | 4.53075000  |
| O | 9.15855500   | 0.03744200  | 2.75151900  |
| O | 11.57318100  | -0.24191400 | -0.62730400 |
| H | 10.64134800  | -2.45782100 | 1.84192400  |
| C | -4.73503700  | 0.63100400  | 0.33233000  |
| C | -4.45012800  | -0.74226100 | 0.31577400  |
| C | -5.50552700  | -1.65982200 | 0.19054100  |
| C | -6.82999700  | -1.21788300 | 0.07246500  |
| C | -7.08697100  | 0.16212500  | 0.10202800  |
| C | -6.05195000  | 1.10075700  | 0.23443500  |
| H | -3.94295500  | 1.36276400  | 0.44145400  |
| H | -5.31539500  | -2.72537700 | 0.15475900  |
| H | -8.11157000  | 0.50775000  | 0.02392700  |
| C | -3.06894300  | -1.22198100 | 0.42196400  |
| C | -2.62836600  | -2.48822800 | 0.79259800  |
| S | -1.72649000  | -0.17276600 | 0.06094400  |
| C | -1.23242700  | -2.60914800 | 0.79285600  |
| H | -3.30223000  | -3.28709100 | 1.07778000  |
| C | -0.56390700  | -1.43961300 | 0.42433400  |
| H | -0.70018200  | -3.51522800 | 1.06434600  |
| C | 0.84741500   | -1.32344100 | 0.36269400  |
| H | 1.38902200   | -2.23550900 | 0.60592500  |
| C | 1.65094400   | -0.24998800 | 0.04967000  |
| C | 1.15673600   | 1.04444200  | -0.29022300 |
| N | 0.73536800   | 2.09440000  | -0.56585800 |
| C | 3.09852900   | -0.43109500 | 0.07202700  |
| O | 3.91305800   | 0.52529800  | -0.18752900 |
| O | 3.64320800   | -1.56396100 | 0.35169500  |
| C | -6.29892200  | 2.56350400  | 0.27586200  |
| C | -7.58674100  | 3.09870300  | 0.53568200  |
| C | -7.75333500  | 4.47929800  | 0.55358800  |
| H | -8.42656400  | 2.44770700  | 0.74374200  |
| C | -5.35453900  | 4.64769300  | 0.08582000  |
| C | -7.91846700  | -2.21366600 | -0.08897600 |
| C | -8.57759800  | -4.38809400 | 0.23115700  |
| C | -10.14786300 | -2.82333600 | -0.81175300 |
| H | -9.31423500  | -0.85882000 | -1.07244300 |
| N | -5.19862400  | 3.34327900  | 0.06624800  |
| N | -6.60147000  | 5.18246600  | 0.30997300  |
| N | -9.79148100  | -4.05294500 | -0.32002600 |
| C | -5.34438200  | 6.99767200  | 0.07690300  |
| C | -4.50314100  | 5.81126200  | -0.07564900 |
| C | -6.68842800  | 6.53830900  | 0.32632700  |
| C | -8.06781700  | 6.80887500  | 0.60952500  |
| C | -8.74428300  | 5.51486000  | 0.75558500  |
| C | -8.72124200  | -5.79711900 | 0.54716600  |
| C | -10.71182300 | -5.04842600 | -0.42158000 |

|   |              |              |             |
|---|--------------|--------------|-------------|
| C | -11.49293100 | -3.03208900  | -1.30471300 |
| C | -11.84318900 | -4.43422700  | -1.05425400 |
| C | -10.06307600 | -6.20777200  | 0.13355600  |
| C | -9.15544400  | -1.85855300  | -0.68816100 |
| N | -7.63735400  | -3.47441200  | 0.34966900  |
| C | -4.76976700  | 8.25495100   | -0.02954900 |
| C | -3.14882100  | 5.91924800   | -0.32335600 |
| C | -8.80022100  | 7.98136800   | 0.75673300  |
| C | -10.09916500 | 5.45388700   | 1.03654400  |
| H | -10.60299300 | 4.49623300   | 1.14608500  |
| H | -2.53447200  | 5.02951300   | -0.43374600 |
| H | -8.32174400  | 8.95159800   | 0.65330500  |
| C | -10.17856500 | 7.92229300   | 1.04364300  |
| C | -10.84065800 | 6.64307100   | 1.18642900  |
| C | -3.38442200  | 8.37833100   | -0.28260200 |
| C | -2.56125400  | 7.19894700   | -0.43155100 |
| H | -5.36938400  | 9.15482500   | 0.07969600  |
| C | -12.39521000 | -2.17578200  | -1.91331800 |
| C | -13.09518000 | -4.90245600  | -1.43497700 |
| C | -7.84594800  | -6.69594800  | 1.12492000  |
| C | -10.45943100 | -7.52367800  | 0.32305600  |
| H | -13.37835100 | -5.93699300  | -1.26023800 |
| H | -12.13741400 | -1.13594800  | -2.10063500 |
| C | -13.66450900 | -2.65139100  | -2.30018600 |
| C | -14.01560000 | -4.03397500  | -2.05577900 |
| C | -9.57107800  | -8.45071900  | 0.91180800  |
| C | -8.24728400  | -8.03543600  | 1.31992400  |
| H | -6.85265800  | -6.37767800  | 1.43033800  |
| H | -11.44996900 | -7.85674200  | 0.02470600  |
| C | -9.94568500  | -9.81128300  | 1.12216000  |
| C | -7.37707500  | -8.99657900  | 1.91249300  |
| C | -14.62024300 | -1.80046700  | -2.93139900 |
| C | -15.30988300 | -4.48267400  | -2.45978700 |
| C | -12.23741300 | 6.62090200   | 1.47778400  |
| C | -10.96003500 | 9.10754700   | 1.20147400  |
| C | -2.75922400  | 9.65505300   | -0.39746500 |
| C | -1.16741400  | 7.35733400   | -0.68451000 |
| C | -12.30182700 | 9.04266200   | 1.48115000  |
| H | -12.87745700 | 9.95694900   | 1.59750800  |
| C | -12.95115000 | 7.78389200   | 1.62175400  |
| H | -14.01400500 | 7.74980600   | 1.84388400  |
| C | -15.85362800 | -2.27242000  | -3.30413100 |
| H | -16.57017400 | -1.61188600  | -3.78403600 |
| C | -16.20078100 | -3.63151900  | -3.06400700 |
| H | -17.18043800 | -3.99380000  | -3.36365100 |
| C | -9.07758600  | -10.70731500 | 1.69651300  |
| H | -9.38352300  | -11.73901600 | 1.84761800  |
| C | -7.77670300  | -10.29728100 | 2.09757500  |
| H | -7.10188200  | -11.01791300 | 2.55076400  |
| C | -0.60453500  | 8.60601700   | -0.78763200 |
| H | 0.45933000   | 8.71142600   | -0.97993700 |
| C | -1.41193200  | 9.76668400   | -0.64230300 |
| H | -0.95554300  | 10.74944100  | -0.72576000 |
| H | -12.72811100 | 5.65611800   | 1.58474700  |
| H | -10.46595700 | 10.07032500  | 1.09493900  |
| H | -3.37376400  | 10.54534000  | -0.28627100 |

|   |              |              |             |
|---|--------------|--------------|-------------|
| H | -0.55638500  | 6.46459600   | -0.79349400 |
| H | -15.57740100 | -5.52078600  | -2.27778200 |
| H | -14.34903400 | -0.76295400  | -3.11280500 |
| H | -10.94013500 | -10.12783800 | 0.81666200  |
| H | -6.38352100  | -8.67620600  | 2.21731100  |
